# Supplementary material
Source: HighWire-hosted journal article supplement (https://gh.bmj.com/content/8/4/e011211)
Supplement: inline-supplementary-material-1 [file inline-supplementary-material-1.pdf]

Wernli, Falcone et al. BMJ Global Health, version 21.03.2023

# Emergent patterns in global health diplomacy: A network analysis of the resolutions adopted by the World Health Assembly from 1948 to 2022

## Supplementary material

### Supplementary material 1 – WHO normative activities from soft to hard law

Adapted from Gostin LO, Sridhar D. Global health and the law. *New England Journal of Medicine* 2014;370(18):1732-40. doi: 10.1056/NEJMr1314094

| Type of law                          | Soft law                                                                                                                                                                                                                                              |                                                                                                                                                                                                                                                                                                                            | Hard Law                                                                                                                                                                                                                                                                                                                                                                                                                                                                                                                                                                                             |
|--------------------------------------|-------------------------------------------------------------------------------------------------------------------------------------------------------------------------------------------------------------------------------------------------------|----------------------------------------------------------------------------------------------------------------------------------------------------------------------------------------------------------------------------------------------------------------------------------------------------------------------------|------------------------------------------------------------------------------------------------------------------------------------------------------------------------------------------------------------------------------------------------------------------------------------------------------------------------------------------------------------------------------------------------------------------------------------------------------------------------------------------------------------------------------------------------------------------------------------------------------|
| Type of discourse                    | Technical                                                                                                                                                                                                                                             | Political                                                                                                                                                                                                                                                                                                                  | Normative                                                                                                                                                                                                                                                                                                                                                                                                                                                                                                                                                                                            |
| Main organs involved                 | Secretariat without formal endorsement from the WHA                                                                                                                                                                                                   | Secretariat, EB, and WHA                                                                                                                                                                                                                                                                                                   | Member states through the WHA                                                                                                                                                                                                                                                                                                                                                                                                                                                                                                                                                                        |
| Typical documents                    | Each year expert meeting reports, technical guidelines, and report from the Secretariat are published under the aegis of the WHO on current health issues.                                                                                            | Resolutions and decisions are formal expressions of the opinion or will of International Organization's organs. Other non-binding instruments include recommendations global strategies, and Global actions plans                                                                                                          | Convention and regulations are the main hard law instruments of the WHO. They differ by the way states can express reservations. Article 22 provide that regulations are binding on all member states unless a country chooses to 'opt out' (cf art. 20)                                                                                                                                                                                                                                                                                                                                             |
| Relevant article of WHO constitution | NA                                                                                                                                                                                                                                                    | <u>Recommendations</u> Article 23 grants authority to the WHA "to make recommendations to Members with respect to any matter within the competence of the Organization". <sup>1</sup>                                                                                                                                      | Article 19 grants WHA "the authority to adopt conventions or agreements with respect to any matter within the competence of the Organization" following a two-third vote requirement/rule. <sup>1</sup>                                                                                                                                                                                                                                                                                                                                                                                              |
| Examples                             | <u>Technical guidance:</u> Documents resulting from the work of technical working group of WHO Staff<br><u>Report by the Secretariat:</u> Report by the Secretariat are the document that the Secretariat to synthesize the work of the organization. | <u>Recommendations:</u> The International Code of Marketing of Breast-Milk Substitutes in 1981 and the Global Code of Practice on the International Recruitment of Health Personnel in 2010 have been the only two main instruments which were adopted by the WHA with formal reference to Article 23 of the Constitution. | <u>Convention:</u> The first convention that was negotiated under the auspices of WHO was the Framework convention on Tobacco control which was adopted in 2003 [Check].<br><u>Regulations:</u> WHO has adopted two sets of regulations. The first is the Nomenclature regulations or international classification of diseases which aim to provide a systematised method regarding how diseases are named. The second is the International Health Regulations (IHR) which were originally adopted in 1951 by WHO* as a legacy from the health multilateral cooperation of 19 <sup>th</sup> century. |

Abbreviation in the table: EB: Executive Board, WHA: World Health Assembly, WHO: World Health Organization. \* The IHR was called "the International Sanitary Regulations".

Wernli, Falcone et al. BMJ Global Health, version 21.03.2023

**Supplementary material 2 – Summary of errors found in the dataset of WHA resolutions 1948-2022**

| Type of error                                                                                                                                                   | Frequency of occurrence                              | Examples of WHA resolutions affected                                                                                                           |
|-----------------------------------------------------------------------------------------------------------------------------------------------------------------|------------------------------------------------------|------------------------------------------------------------------------------------------------------------------------------------------------|
| <i>Errors from the database or from the document</i>                                                                                                            |                                                      |                                                                                                                                                |
| The document available from the IRIS database corresponds to another entry                                                                                      | Very rare with only 1 occurrence found <0.1%         | WHA 59.26 has the text of 59.27 in the IRIS entry.                                                                                             |
| A wrong citation is attributed to a resolution because the PDF of the document contains text from different resolutions or annexes associated with a resolution | Rare <1%                                             | Resolution WHA28.38 had also the text of WHA28.39. Resolution WHA41.18 had an annexe which leads to identification of wrong citations.         |
| There is a typo in the text of the resolution itself.                                                                                                           | Very rare with only 1 occurrence found <0.1%         | Resolutions WHA35.23 is cited as WHA35.23 in resolution 38.21.                                                                                 |
| Resolutions that are cited but are not in the dataset of documents                                                                                              | Rare < 1%                                            | Nine resolutions from the first WHA: WHA1.15, WHA1.22, WHA1.43, WHA1.80, WHA1.91, WHA1.92, WHA1.130, WHA1.133, and 1.139.                      |
| <i>Errors from Optical character recognition</i>                                                                                                                |                                                      |                                                                                                                                                |
| Because a character is not recognized which result in the overall regular expression not being recognized                                                       | Frequent with more than 100 occurrences found (3,1%) | WHA37.16 is OCR as "WHA37•16". WHA31.45 appears as "WHA31, 45;" in resolution WHA38.24. WHA35.18 appears as "WHA35/18" in resolution WHA40.22. |
| A wrong number is assigned to the resolution because of error in the recognition of character                                                                   | Rare <1%                                             | WHA49.25 was coded WHA49.3820. In resolution WHA47.9, text on the 2 <sup>nd</sup> page was interpreted as WHA47.57.                            |
| <i>Other types of errors detected in the dataset</i>                                                                                                            |                                                      |                                                                                                                                                |
| Missing title in the PDF of the resolution                                                                                                                      | Very rare <0.1%                                      | WHA 32.3 of 1979                                                                                                                               |

Abbreviation in the table: IRIS: Institutional Repository for Information Sharing, PDF: Portable Document Format WHA: World Health Assembly.

**Supplementary material 3 – List of resolutions in the dataset with identifier, title, year, cited resolutions and cited by other resolutions**

- WHA1.1 (1948) Resolution 1: regarding adoption of the International statistical classification of diseases, injuries and causes of death.
- WHA1.2 (1948) Resolution 2: regarding the use of the International statistical classification of diseases, injuries and causes of death.
- WHA1.3 (1948) Resolution 3: regarding the use of lists of selected causes for special purposes.
- WHA1.4 (1948) Resolution 4: regarding the preparation of a list adapted to the problems of foeto-infantile morbidity and mortality.
- WHA1.5 (1948) Resolution 5: regarding age-grouping to be used in the tabulation of health statistics.
- WHA1.6 (1948) Resolution 6: regarding the problem of multiple causes of death.
- WHA1.7 (1948) Resolution 7: regarding the Spanish version of the International statistical classification of diseases, injuries and causes of death.
- WHA1.8 (1948) Resolution 8: regarding methods of international cooperation in the field of vital and health statistics.
- WHA1.9 (1948) Resolution 9: regarding national committees on vital and health statistics.
- WHA1.10 (1948) Regarding the instruction in statistics in medical schools.
- WHA1.15 (1948) This resolution is not available from the IRIS database. Cited by: WHA28.59.
- WHA1.22 (1948) This resolution is not available from the IRIS database. Cited by: WHA11.49.
- WHA1.43 (1948) This resolution is not available from the IRIS database. Cited by: WHA28.40.
- WHA1.80 (1948) This resolution is not available from the IRIS database. Cited by: WHA27.9.
- WHA1.91 (1948) This resolution is not available from the IRIS database. Cited by: WHA28.38.

Wernli, Falcone et al. BMJ Global Health, version 21.03.2023

- WHA1.92 (1948) This resolution is not available from the IRIS database. Cited by: WHA12.6, WHA22.8.
- WHA1.130 (1948) This resolution is not available from the IRIS database. Cited by: WHA40.25.
- WHA1.133 (1948) This resolution is not available from the IRIS database. Cited by: WHA9.23.
- WHA1.139 (1948) This resolution is not available from the IRIS database. Cited by: WHA28.38.
- WHA2.1 (1949) Procedure for the examination of the programme and budget for 1950.
- WHA2.2 (1949) Expert Committee on Maternal and Child Health: report on the first session.
- WHA2.3 (1949) Expert Committee on Venereal Diseases: report on the second session.
- WHA2.4 (1949) Activities with the United Nations and specialized agencies and non-governmental organizations on venereal-disease control.
- WHA2.5 (1949) Co-ordination of international congresses of medical sciences: proposed collaboration with the permanent council. Cited by: WHA9.34.
- WHA2.6 (1949) Co-operation with UNESCO in the co-ordination of international congresses of medical sciences.
- WHA2.7 (1949) Technical training of medical and auxiliary personnel.
- WHA2.8 (1949) Publications: International digest of health legislation.
- WHA2.9 (1949) Expert Committee on Biological Standardization: report on the third session and report of the Sub-Committee on Fat-Soluble Vitamins.
- WHA2.10 (1949) Expert Committee on the Unification of Pharmacopoeias: reports on the third and fourth sessions.
- WHA2.11 (1949) Expert Committee on Habit-forming Drugs: report on the first session.
- WHA2.12 (1949) Co-operation with FAO on nutrition problems.
- WHA2.13 (1949) National nutrition committees.
- WHA2.14 (1949) Production of synthetic vitamins.
- WHA2.15 (1949) Expert Committee on International Epidemiology and Quarantine: report on the first session and principles to govern WHO sanitary regulations.
- WHA2.16 (1949) Section on quarantine of the Expert Committee on International Epidemiology and Quarantine: report on the first session.
- WHA2.17 (1949) Reports on international epidemic control.
- WHA2.18 (1949) Expert Committee on Insecticides: report on the first session.
- WHA2.19 (1949) Co-ordination of research. Cited by: WHA7.52, WHA12.17, WHA12.25.
- WHA2.20 (1949) Proposal to widen the terms of reference of the Expert Committee on Malaria.
- WHA2.21 (1949) Activities with ECOSOC and with specialized agencies on malaria control.
- WHA2.22 (1949) Expert Committee on Tuberculosis: report on the third session.
- WHA2.23 (1949) Activities with UNICEF and the International Union against Tuberculosis.
- WHA2.24 (1949) Joint committee on health policy, UNICEF/WHO.
- WHA2.25 (1949) Nuclear expert committee on mental health.
- WHA2.26 (1949) Activities with the United Nations, specialized agencies, and non-governmental organizations on matters connected with mental health.
- WHA2.27 (1949) Insulin.
- WHA2.28 (1949) Co-operation with the Economic Commission for Europe.
- WHA2.29 (1949) Physical training.
- WHA2.30 (1949) Activities with the United Nations, specialized agencies and non-governmental organizations on public-health administration.
- WHA2.31 (1949) General co-ordination with the United Nations and specialized agencies.
- WHA2.32 (1949) International research laboratories.
- WHA2.33 (1949) Health situation of displaced persons.
- WHA2.34 (1949) Co-operation with the United Nations on the United Nations Library, Geneva.
- WHA2.35 (1949) World Health Day.
- WHA2.36 (1949) Bejel and other treponematoses.
- WHA2.37 (1949) International health yearbook.
- WHA2.38 (1949) Expert Committee on Health Statistics: report on the first session.

Wernli, Falcone et al. BMJ Global Health, version 21.03.2023

- WHA2.39 (1949) Health statistics: registration, compilation and transmission.
- WHA2.40 (1949) Use of statistical methods.
- WHA2.41 (1949) Joint programme of FAO/WHO to increase world food production and raise standards of health.
- WHA2.42 (1949) Tuberculosis programme: staff.
- WHA2.43 (1949) Leprosy.
- WHA2.44 (1949) Availability of technical knowledge of production processes of antibiotics.
- WHA2.45 (1949) Administrative and financial relations between the United Nations and specialized agencies.
- WHA2.46 (1949) Transportation and/or per diem allowances for delegates to the third and subsequent health assemblies. Cited by: WHA10.43, WHA28.38.
- WHA2.47 (1949) Insurance against travel accidents of delegates to the Health Assembly and of members of the Executive Board.
- WHA2.48 (1949) Approval of additions to the provisional staff regulations.
- WHA2.49 (1949) Staff pension committee.
- WHA2.50 (1949) Financial report and accounts of the Interim Commission for the financial period 1 January to 31 August 1948, and the report of the external auditor.
- WHA2.51 (1949) Financial report and accounts of the World Health Organization for the financial period 1 September to 31 December 1948, and report of the external auditor.
- WHA2.52 (1949) Feasibility of using the United Nations board of auditors.
- WHA2.53 (1949) Appointment of the external auditor for 1950. Cited by: WHA3.87.
- WHA2.54 (1949) State of contributions to the budget for 1948.
- WHA2.55 (1949) Status of contributions to the budget for 1949.
- WHA2.56 (1949) Policy to be followed concerning contributions to arrears.
- WHA2.57 (1949) Establishment of the working capital fund as a single fund and assessment of new members. Cited by: WHA3.105.
- WHA2.58 (1949) Currency of contributions. Cited by: WHA27.13, WHA28.23.
- WHA2.59 (1949) Notification to governments of vacancies for professional and senior staff.
- WHA2.60 (1949) Budget estimates for the proposed 1950 programme.
- WHA2.61 (1949) Headquarters office accommodation.
- WHA2.62 (1949) Financial responsibilities of the Executive Board.
- WHA2.63 (1949) Reimbursement by governments for materials, supplies and equipment.
- WHA2.64 (1949) Appointment of members and alternates to the Staff Pension Committee. Cited by: WHA4.63.
- WHA2.65 (1949) Currency of contributions.
- WHA2.66 (1949) Working capital fund for 1950. Cited by: WHA3.105.
- WHA2.67 (1949) Scale of assessments: contribution of Israel to the budgets of 1949 and 1950. Cited by: WHA3.85.
- WHA2.68 (1949) Scale of assessments: determination of the maximum contribution to the regular expenses of the Organization. Cited by: WHA3.91.
- WHA2.69 (1949) Scale of assessments: contribution of the state of South Korea to the budgets of 1949 and 1950.
- WHA2.70 (1949) Scale of assessments: financial obligations of associate members.
- WHA2.71 (1949) Appropriation resolution. Cited by: WHA4.68.
- WHA2.72 (1949) Contributions to the regular operating budget.
- WHA2.73 (1949) Programme medical supply services.
- WHA2.74 (1949) Establishment of a regional organization for the European area.
- WHA2.75 (1949) Supplemental operating programme of advisory and technical services budget.
- WHA2.76 (1949) United Nations project for the relief of Palestine refugees.
- WHA2.77 (1949) Establishment of an expert committee on nursing.
- WHA2.78 (1949) Adoption of the programme and budget for 1950.



Wernli, Falcone et al. BMJ Global Health, version 21.03.2023

- WHA2.79 (1949) Supplemental operating programme of advisory and technical services: priority items.
- WHA2.80 (1949) Procedure for nomination and election of members entitled to designate a person to serve on the Executive Board.
- WHA2.81 (1949) Approval of the agreement with the government of India.
- WHA2.82 (1949) Negotiations for an agreement with the government of Egypt.
- WHA2.83 (1949) Situation with regard to the Office international d'Hygiène publique.
- WHA2.84 (1949) Amendments to regulations and rules of procedure for expert committees and their sub-committees.
- WHA2.85 (1949) Policy on invitations to appoint members to governing bodies of health organizations: London School of Hygiene and Tropical Medicine.
- WHA2.86 (1949) Hygiene of housing.
- WHA2.87 (1949) Relations with the specialized agencies of the United Nations.
- WHA2.88 (1949) Relations with the International Trade Organization.
- WHA2.89 (1949) Relations with the Intergovernmental Maritime Consultative Organization.
- WHA2.90 (1949) Action taken by certain countries with regard to membership of WHO.
- WHA2.91 (1949) Approval of agreement with the Pan American Sanitary Organization.
- WHA2.92 (1949) Recommendations on accessions to Convention on Privileges and Immunities.
- WHA2.93 (1949) WHO regulations on nomenclature, 1948: proposed amendment to article 20.
- WHA2.94 (1949) Adoption of amendments to the rules of procedure of the World Health Assembly.
- WHA2.95 (1949) Proposed amendments to the rules of procedure of the World Health Assembly.
- WHA2.96 (1949) Assignment of Greece to the European regional area.
- WHA2.97 (1949) Regional organization: Western Pacific area.
- WHA2.98 (1949) Application for membership of WHO: San Marino.
- WHA2.99 (1949) Admission of Korea (South).
- WHA2.100 (1949) Inter-organization agreements: correction of the French texts.
- WHA2.101 (1949) Agreement with ILO: article VII.
- WHA2.102 (1949) Amendment to the rules of procedure of the World Health Assembly concerning the status of associate members.
- WHA2.103 (1949) Rights and obligations of associate members and other territories in regional organizations. Cited by: WHA6.38, WHA7.28, WHA19.31.
- WHA2.104 (1949) Regional organization: African area.
- WHA2.105 (1949) Convention on Privilege and Immunities: extension to representatives of associate members and other territories.
- WHA3.1 (1950) General programme of work covering a specific period.
- WHA3.2 (1950) Expert Committee on Professional and Technical Education of Medical and Auxiliary Personnel: report on the first session.
- WHA3.3 (1950) Expert Committee on International Epidemiology and Quarantine: report on the second session.
- WHA3.4 (1950) Section on quarantine of the Expert Committee on International Epidemiology and Quarantine: report on the second session.
- WHA3.5 (1950) International certificates of vaccination.
- WHA3.6 (1950) Expert Committee on Health Statistics: report on the second session.
- WHA3.7 (1950) Population problems.
- WHA3.8 (1950) International biological standards. Cited by: WHA18.7, WHA26.32, WHA37.27.
- WHA3.9 (1950) Expert Committee on the Unification of Pharmacopoeias: report on the fifth session.
- WHA3.10 (1950) Pharmacopoea Internationalis.
- WHA3.11 (1950) Non-Proprietary names for drugs.
- WHA3.12 (1950) Expert Committee on Drugs Liable to Produce Addiction: report on the second session.
- WHA3.13 (1950) Expert Committee on Antibiotics: report on the first session.

Wernli, Falcone et al. BMJ Global Health, version 21.03.2023

- WHA3.14 (1950) Languages of publication of the Bulletin of the World Health Organization.
- WHA3.15 (1950) International Digest of Health Legislation and publication of health legislation considered to be of international importance.
- WHA3.16 (1950) International Health Yearbook.
- WHA3.17 (1950) Salmonellae.
- WHA3.18 (1950) Smallpox. Cited by: WHA11.54.
- WHA3.19 (1950) Yellow-fever panel: report on the first session.
- WHA3.20 (1950) Rabies.
- WHA3.21 (1950) Poliomyelitis.
- WHA3.22 (1950) Trachoma.
- WHA3.23 (1950) Hydatidosis.
- WHA3.24 (1950) Typhus and other rickettsioses.
- WHA3.25 (1950) Q fever.
- WHA3.26 (1950) Bilharziasis. Cited by: WHA54.19, WHA65.21.
- WHA3.27 (1950) Prevention of importation of anophelines.
- WHA3.28 (1950) Bovine tuberculosis.
- WHA3.29 (1950) Rheumatic diseases. Cited by: WHA28.59.
- WHA3.30 (1950) Epidemic and serum hepatitis.
- WHA3.31 (1950) Joint ILO/WHO Committee on the Hygiene of Seafarers: report on the first session.
- WHA3.32 (1950) Physical training.
- WHA3.33 (1950) Dental hygiene. Cited by: WHA4.5.
- WHA3.34 (1950) Rehabilitation of the disabled, including the blind. Cited by: WHA4.18.
- WHA3.35 (1950) Expert Committee on Environmental Sanitation: report on first session.
- WHA3.36 (1950) Pestilential diseases.
- WHA3.37 (1950) Expert Committee on Venereal Diseases: report on the third session.
- WHA3.38 (1950) Expert Committee on Nursing: report on the first session.
- WHA3.39 (1950) Expert Group on Prematurity: report on session.
- WHA3.40 (1950) Nutrition.
- WHA3.41 (1950) Expert Committee on Mental Health: report on first session.
- WHA3.42 (1950) Supplies for governmental programmes.
- WHA3.43 (1950) Labelling and distribution of insecticides.
- WHA3.44 (1950) Freer flow of medical supplies.
- WHA3.45 (1950) Production of synthetic vitamins in under-developed countries.
- WHA3.46 (1950) Joint activities of WHO and UNICEF.
- WHA3.47 (1950) Regulations for expert advisory panels and committees.
- WHA3.48 (1950) Problem of proliferation and overlapping of programmes of the United Nations and of specialized agencies.
- WHA3.49 (1950) Establishment of national WHO committees.
- WHA3.50 (1950) Continuing needs of children.
- WHA3.51 (1950) National nutrition committees.
- WHA3.52 (1950) Léon Bernard Foundation: amendment of statutes.
- WHA3.53 (1950) Programme of epidemiological work to be carried out with OIHP funds.
- WHA3.54 (1950) Western Pacific regional organization.
- WHA3.55 (1950) Administrative office for Africa.
- WHA3.56 (1950) Emergency sanitary measures in connection with the Mecca pilgrimage.
- WHA3.57 (1950) Technical assistance programme.
- WHA3.58 (1950) Expert Committee on Plague: report on the first session.
- WHA3.59 (1950) Joint OIHP/WHO study-group on Cholera: report on the third session.
- WHA3.60 (1950) Expert Committee on Malaria: report on the third session.
- WHA3.61 (1950) Expert Committee on Tuberculosis: report on the fourth session.
- WHA3.62 (1950) Therapeutic substances.

Wernli, Falcone et al. BMJ Global Health, version 21.03.2023

- WHA3.63 (1950) Programme of publications. Cited by: WHA4.4, WHA5.24.
- WHA3.64 (1950) Stimulation of campaigns against communicable diseases.
- WHA3.65 (1950) Organization of public-health services.
- WHA3.66 (1950) Health education of the public.
- WHA3.67 (1950) Nursing.
- WHA3.68 (1950) General promotion of health.
- WHA3.69 (1950) Professional and technical education.
- WHA3.70 (1950) Medical supplies.
- WHA3.71 (1950) Adjustment of operating programme for 1951.
- WHA3.72 (1950) Financial report and accounts of the World Health Organization (1 January-31 December 1949) and report of the external auditor.
- WHA3.73 (1950) Status of contributions to the budget for 1948.
- WHA3.74 (1950) Status of contributions to the budget for 1949.
- WHA3.75 (1950) Admission of the United States of Indonesia to membership of WHO.
- WHA3.76 (1950) Admission of Viet Nam, Cambodia and Laos to membership of WHO.
- WHA3.77 (1950) Admission of Southern Rhodesia as an associate member of WHO.
- WHA3.78 (1950) Report on absentee members of the Executive Board.
- WHA3.79 (1950) Use of UNRRA special fund during 1951.
- WHA3.80 (1950) Level of expenditure for 1950.
- WHA3.81 (1950) Level of expenditure for 1951.
- WHA3.82 (1950) Amendments to the rules of procedure of the World Health Assembly.
- WHA3.83 (1950) Agreement with the government of Egypt.
- WHA3.84 (1950) Action taken by certain countries with respect to membership of WHO.
- WHA3.85 (1950) Scale of assessments for 1950: Israel. Cites: WHA2.67.
- WHA3.86 (1950) Provisional scale of assessments for associate members. Cited by: WHA5.55.
- WHA3.87 (1950) Appointment of the external auditor for 1951. Cites: WHA2.53.
- WHA3.88 (1950) Report on financial rules.
- WHA3.89 (1950) Organizational structure of the Secretariat.
- WHA3.90 (1950) Action taken by China with respect to membership of WHO.
- WHA3.91 (1950) Scale of assessments for 1951. Cites: WHA2.68.
- WHA3.92 (1950) World Health Defence Fund.
- WHA3.93 (1950) Provisional staff regulations.
- WHA3.94 (1950) Staff rules.
- WHA3.95 (1950) Currency of contributions.
- WHA3.96 (1950) Proposed amendments to the constitution of the World Health Organization. Cited by: WHA4.55, WHA6.57, WHA32.26.
- WHA3.97 (1950) Issue of special world health stamps by member states to raise funds for promoting international health work by WHO.
- WHA3.98 (1950) Office international d'Hygiène publique.
- WHA3.99 (1950) Place of fourth World Health Assembly.
- WHA3.100 (1950) International Civil Service Advisory Board.
- WHA3.101 (1950) Arrangements for accommodation for headquarters office. Cites: WHA3.105. Cited by: WHA3.105.
- WHA3.102 (1950) Convention on Privileges and Immunities of the Specialized Agencies: amendments to annex VII concerning associate members and persons serving on expert advisory panels.
- WHA3.103 (1950) Appointment of member and alternate to the Staff Pension Committee.
- WHA3.104 (1950) Confidential report on the composition of the Secretariat.
- WHA3.105 (1950) Working capital fund. Cites: WHA2.57, WHA2.66, WHA3.101. Cited by: WHA3.101, WHA4.37, WHA4.40.
- WHA3.106 (1950) Procedure for consideration of the programme budget at the fourth World Health Assembly.

Wernli, Falcone et al. BMJ Global Health, version 21.03.2023

- WHA3.107 (1950) Form of presentation of programme and budget estimates. Cited by: WHA7.36.
- WHA3.108 (1950) Reimbursement of WHO by UNICEF in respect of certain services.
- WHA3.109 (1950) Appropriation resolution for the financial year 1951. Cited by: WHA4.37, WHA4.38, WHA4.69.
- WHA3.110 (1950) Appropriation resolution for the financial year 1950: amendment concerning publications.
- WHA3.111 (1950) Provisional financial regulations: extension for a further year.
- WHA3.112 (1950) Suspension of financial regulations 13 and 16(e).
- WHA3.113 (1950) Principles governing admission of non-governmental organizations into official relations with WHO. Cited by: WHA40.25.
- WHA3.114 (1950) Principles to govern relations between WHO and regional and national non-governmental organizations.
- WHA3.115 (1950) Budget level for 1951.
- WHA3.116 (1950) Technical assistance programme. Cited by: WHA4.22, WHA5.59.
- WHA3.117 (1950) Programme and budget for 1951.
- WHA3.118 (1950) Assignment of the Republic of the United States of Indonesia to the South-East Asia region.
- WHA3.119 (1950) Temporary assignment of the state of Viet Nam and the kingdoms of Cambodia and Laos to the South-East Asia region.
- WHA3.120 (1950) Election of members entitled to designate a person to serve on the Executive Board.
- WHA3.121 (1950) Award of Count Bernadotte Memorial Medal to WHO.
- WHA3.122 (1950) Reports of the Executive Board and of the Director-General.
- WHA3.123 (1950) Action taken by Hungary with respect to membership of WHO.
- WHA4.1 (1951) Annual report of the Director-General for 1950.
- WHA4.2 (1951) General programme of work covering a specific period.
- WHA4.3 (1951) Health statistics.
- WHA4.4 (1951) Publications. Cites: WHA3.63.
- WHA4.5 (1951) Dental hygiene. Cites: WHA3.33.
- WHA4.6 (1951) First Inter-American Sanitary Congress.
- WHA4.7 (1951) Tuberculosis Research Office, Copenhagen.
- WHA4.8 (1951) Prevention and treatment of severe malnutrition in times of disaster.
- WHA4.9 (1951) Technical discussions at World Health Assemblies. Cited by: WHA5.7, WHA5.77.
- WHA4.10 (1951) Concentration of effort and resources of the United Nations and specialized agencies. Cited by: WHA7.36.
- WHA4.11 (1951) Schedule of work of the Economic and Social Council.
- WHA4.12 (1951) Active support by member states for the work of specialized agencies.
- WHA4.13 (1951) Permanent secretariat for the International Pharmacopeia.
- WHA4.14 (1951) Adoption of regulations for expert advisory panels and committees. Cited by: WHA12.17, WHA35.10.
- WHA4.15 (1951) Relations with the United Nations Relief and Works Agency for Palestine refugees in the Near East. Cited by: WHA5.72.
- WHA4.16 (1951) Long-range activities for children and relations with UNICEF.
- WHA4.17 (1951) Development of arid land, and international co-operation on water control and utilization.
- WHA4.18 (1951) Rehabilitation of physically handicapped. Cites: WHA3.34. Cited by: WHA7.36.
- WHA4.19 (1951) Improvement of environmental hygiene and sanitation.
- WHA4.20 (1951) Role of hospitals in world health.
- WHA4.21 (1951) Resettlement of refugee physicians.
- WHA4.22 (1951) Technical assistance programme. Cites: WHA3.116.
- WHA4.23 (1951) Co-ordination of technical assistance programmes.

Wernli, Falcone et al. BMJ Global Health, version 21.03.2023

- WHA4.24 (1951) Projects for technical assistance.
- WHA4.25 (1951) Medical supplies for member governments.
- WHA4.26 (1951) Scientific research in the field of health.
- WHA4.27 (1951) Development of national health programmes. Cited by: WHA8.42.
- WHA4.28 (1951) Utilization of short-term consultants.
- WHA4.29 (1951) Trachoma.
- WHA4.30 (1951) Supply of insecticides.
- WHA4.31 (1951) Toxic hazards of certain insecticides and similar products.
- WHA4.32 (1951) Control of venereal disease among the Rhine boatmen.
- WHA4.33 (1951) Regular programme for 1952.
- WHA4.34 (1951) Financial report and accounts of the World Health Organization for 1950 and the report of the external auditor.
- WHA4.35 (1951) Arrears of contributions.
- WHA4.36 (1951) Working capital fund.
- WHA4.37 (1951) Supplemental budget for 1951: obligations to the United Nations. Cites: WHA3.105, WHA3.109.
- WHA4.38 (1951) Supplemental budget for 1951: assistance to refugees in Turkey. Cites: WHA3.109.
- WHA4.39 (1951) Scale of assessments: Israel, Korea and Viet Nam.
- WHA4.40 (1951) Measures for improving the financial position of the World Health Organization. Cites: WHA3.105. Cited by: WHA7.49.
- WHA4.41 (1951) Additional funds for the budget of the World Health Organization.
- WHA4.42 (1951) Admission to membership of the World Health Organization: Japan.
- WHA4.43 (1951) Admission to membership of the World Health Organization: Federal Republic of Germany.
- WHA4.44 (1951) Admission to membership of the World Health Organization: Spain.
- WHA4.45 (1951) Action taken by Poland with respect to membership of the World Health Organization.
- WHA4.46 (1951) Amendments to the rules of procedure of the World Health Assembly.
- WHA4.47 (1951) Scale of assessments.
- WHA4.48 (1951) WHO seals. Cited by: WHA5.50.
- WHA4.49 (1951) Co-ordination of administrative and financial questions in the United Nations specialized agencies.
- WHA4.50 (1951) Adoption of financial regulations of the World Health Organization.
- WHA4.51 (1951) Adoption of the staff regulations of the World Health Organization. Cited by: WHA55.24.
- WHA4.52 (1951) Amendments to the staff rules: general.
- WHA4.53 (1951) Staff rules: salary differential.
- WHA4.54 (1951) Appointment of external auditor for the financial years 1952 to 1954.
- WHA4.55 (1951) Organizational structure and administrative efficiency of the World Health Organization. Cites: WHA3.96.
- WHA4.56 (1951) Form of presentation of the programme and budget estimates. Cited by: WHA7.36.
- WHA4.57 (1951) Use of Spanish at WHO meetings.
- WHA4.58 (1951) Transfer of the assets of the Office International d'Hygiène publique.
- WHA4.59 (1951) Agreement with the government of Egypt.
- WHA4.60 (1951) Costs to be borne by recipient governments in connection with field projects. Cited by: WHA5.59, WHA22.27.
- WHA4.61 (1951) Admission of non-governmental organizations to relationship with the World Health Organization.
- WHA4.62 (1951) Salary of the Director-General.
- WHA4.63 (1951) Appointment of representatives to the WHO Staff Pension Committee. Cites: WHA2.64.

Wernli, Falcone et al. BMJ Global Health, version 21.03.2023

- WHA4.64 (1951) Working capital fund for 1952.
- WHA4.65 (1951) Place of the fifth World Health Assembly.
- WHA4.66 (1951) Place of the sixth World Health Assembly and of future health assemblies.
- WHA4.67 (1951) Assignment to regions: Morocco, Tunisia and Algeria.
- WHA4.68 (1951) Appropriation resolution for the financial year 1950: amendment. Cites: WHA2.71.
- WHA4.69 (1951) Appropriation resolution for the financial year 1951: amendment. Cites: WHA3.109.
- WHA4.70 (1951) Emergency action to assist in the maintenance of international peace and security.
- WHA4.71 (1951) Budget level for 1952.
- WHA4.72 (1951) Effective working budget for 1952.
- WHA4.73 (1951) Appropriation resolution for the financial year 1952. Cited by: WHA5.36.
- WHA4.74 (1951) Co-ordination of planning of UNICEF/WHO programmes. Cited by: WHA7.36.
- WHA4.75 (1951) Adaption of the International Sanitary Regulations (WHO regulations no. 2).
- WHA4.76 (1951) Explanatory memorandum on the International Sanitary Regulations (WHO regulations no.2).
- WHA4.77 (1951) Terms of reference of committees to deal with the application of the International Sanitary Regulations.
- WHA4.78 (1951) Epidemic diseases not covered by the International Sanitary Regulations (WHO regulations no. 2). Cited by: WHA6.20.
- WHA4.79 (1951) Special measures for the protection of isolated communities. Cited by: WHA6.20.
- WHA4.80 (1951) Additional national health and sanitary measures to prevent the spread of the six quarantinable diseases. Cited by: WHA6.20.
- WHA4.81 (1951) Sanitary protection in the case of mass movements of populations. Cited by: WHA6.20.
- WHA4.82 (1951) Hygiene and sanitation of airports. Cited by: WHA6.20, WHA7.56.
- WHA4.83 (1951) Criteria for determining the limits of yellow-fever endemic zones. Cited by: WHA6.20.
- WHA4.84 (1951) Kamaran quarantine station.
- WHA4.85 (1951) Léon Bernard Foundation prize.
- WHA4.86 (1951) Inclusion of Cambodia, Laos and Viet Nam in the Western Pacific Region.
- WHA4.87 (1951) Regional Committee for the Western Pacific: date of first meeting.
- WHA4.88 (1951) Earthquake in El Salvador.
- WHA4.89 (1951) Election of members entitled to designate a person to serve on the Executive Board.
- WHA4.90 (1951) Approval of reports of the Executive Board.
- WHA5.1 (1952) Establishment of the main committees of the fifth World Health Assembly.
- WHA5.2 (1952) Admission to membership of the World Health Organization: United Kingdom of Libya.
- WHA5.3 (1952) Sovereign and Military Order of Malta.
- WHA5.4 (1952) Reports of the Executive Board on its eighth and ninth sessions.
- WHA5.5 (1952) Annual report of the Director-General for 1951.
- WHA5.6 (1952) Award of the Léon Bernard Foundation Medal and Prize.
- WHA5.7 (1952) Topics for the technical discussions at the fifth World Health Assembly. Cites: WHA4.9.
- WHA5.8 (1952) Budget level for 1953.
- WHA5.9 (1952) Effective working budget for 1953.
- WHA5.10 (1952) Supplemental budget for 1952.
- WHA5.11 (1952) Amendments to staff rules.
- WHA5.12 (1952) Revised financial rules.
- WHA5.13 (1952) Arrears of contributions and advances to the working capital fund.
- WHA5.14 (1952) Chronicle of the World Health Organization: Russian edition.
- WHA5.15 (1952) Admission of Tunisia as an associate member of the World Health Organization.



Wernli, Falcone et al. BMJ Global Health, version 21.03.2023

- WHA5.16 (1952) Admission of Morocco as an associate member of the World Health Organization. Cited by: WHA6.37.
- WHA5.17 (1952) Accident insurance for members of the Executive Board.
- WHA5.18 (1952) Working capital fund for 1953.
- WHA5.19 (1952) Status of the Assembly suspense account as at 31 December 1951.
- WHA5.20 (1952) Currency of contributions: proposed use of sterling.
- WHA5.21 (1952) Reimbursement by governments for materials, supplies and equipment.
- WHA5.22 (1952) Frequency of sessions of the Health Assembly. Cited by: WHA32.26.
- WHA5.23 (1952) Publications revolving fund.
- WHA5.24 (1952) Publications programme. Cites: WHA3.63.
- WHA5.25 (1952) General programme of work for a specific period.
- WHA5.26 (1952) Vital and health statistics.
- WHA5.27 (1952) Fellowships: under-developed countries.
- WHA5.28 (1952) Leprosy. Cited by: WHA28.56.
- WHA5.29 (1952) Supply and requirements of insecticides: world position.
- WHA5.30 (1952) Production of insecticides and antibiotics.
- WHA5.31 (1952) Recording and transmission of epidemiological information.
- WHA5.32 (1952) Reservations and proposed amendments to the International Sanitary Regulations (WHO regulations no.2).
- WHA5.33 (1952) Election of members entitled to designate a person to serve on the Executive Board.
- WHA5.34 (1952) Co-operation with the Council for Co-ordination of International Congresses of Medical Sciences.
- WHA5.35 (1952) Financial report and accounts of the World Health Organization for 1951 and report of the external auditor.
- WHA5.36 (1952) Amendment to the 1952 appropriation resolution. Cites: WHA4.73.
- WHA5.37 (1952) Appropriation resolution for the financial year 1953.
- WHA5.38 (1952) Amendments to the rules of procedure of the World Health Assembly.
- WHA5.39 (1952) Annual reports from member states.
- WHA5.40 (1952) Office international d'Hygiène publique: denunciation of Rome agreement by the Federal Republic of Germany, Japan and Spain.
- WHA5.41 (1952) Host agreement with the government of the Philippines.
- WHA5.42 (1952) Rights and obligations of associate members.
- WHA5.43 (1952) Assignment to regions.
- WHA5.44 (1952) Assignment of United Kingdom of Libya to the Eastern Mediterranean region.
- WHA5.45 (1952) Regional Committee for the Eastern Mediterranean.
- WHA5.46 (1952) Temporary admission of Turkey to the European region.
- WHA5.47 (1952) Place of the sixth World Health Assembly.
- WHA5.48 (1952) Health assemblies away from Headquarters. Cited by: WHA20.39.
- WHA5.49 (1952) Duration of sessions of the Health Assembly.
- WHA5.50 (1952) WHO seals. Cites: WHA4.48.
- WHA5.51 (1952) Appointments to the WHO Staff Pension Committee.
- WHA5.52 (1952) Renewal of the contract of the Director-General.
- WHA5.53 (1952) Salary differential.
- WHA5.54 (1952) Accommodation for the Headquarters office.
- WHA5.55 (1952) Scale of assessments for 1953. Cites: WHA3.86.
- WHA5.56 (1952) Proposals from the Republic of China regarding financial contributions to WHO.
- WHA5.57 (1952) Study of scale of assessments.
- WHA5.58 (1952) Exceptional contribution from the Kingdom of Laos.
- WHA5.59 (1952) Participation of member states in certain costs incurred in the operation of field projects. Cites: WHA3.116, WHA4.60. Cited by: WHA6.51, WHA7.42.
- WHA5.60 (1952) Approval of the regular programme for 1953.

Wernli, Falcone et al. BMJ Global Health, version 21.03.2023

- WHA5.61 (1952) Technical assistance program: third and fourth periods. Cited by: WHA8.21.
- WHA5.62 (1952) Review of programme and budget estimates by the Executive Board.
- WHA5.63 (1952) Future organizational studies by the Executive Board. Cited by: WHA6.21.
- WHA5.64 (1952) Procedure for determining the necessity for further meetings of expert committees.
- WHA5.65 (1952) Reports of the Administrative Committee on Co-ordination.
- WHA5.66 (1952) Co-ordination of work of the United Nations and the specialized agencies.
- WHA5.67 (1952) Representation at meetings of other organizations.
- WHA5.68 (1952) Long-range activities for children: report of the technical working group.
- WHA5.69 (1952) Rehabilitation of the physically handicapped: report of the technical working group.
- WHA5.70 (1952) Community welfare centers.
- WHA5.71 (1952) UNICEF/WHO health programmes.
- WHA5.72 (1952) Extension of agreement with the United Nations Relief and Works Agency for Palestine refugees in the Near East. Cites: WHA4.15. Cited by: WHA6.25.
- WHA5.73 (1952) Medical care in relation to public health.
- WHA5.74 (1952) Agreement with the World Meteorological Organization.
- WHA5.75 (1952) International Committee of Military Medicine and Pharmacy.
- WHA5.76 (1952) Publicity given to wonder or miracle drugs.
- WHA5.77 (1952) Organization of technical discussions at future Health Assemblies. Cites: WHA4.9.
- WHA5.78 (1952) Topics for technical discussions at the sixth World Health Assembly.
- WHA6.1 (1953) Establishment of main committees of the sixth World Health Assembly.
- WHA6.2 (1953) Election and appointment of the Director-General. Cited by: WHA10.31.
- WHA6.3 (1953) Contract of the Director-General.
- WHA6.4 (1953) Award of the Léon Bernard Foundation medal and prize.
- WHA6.5 (1953) Admission of Nepal to membership of the World Health Organization.
- WHA6.6 (1953) Assessment of China. Cited by: WHA7.17.
- WHA6.7 (1953) Budget level for 1954.
- WHA6.8 (1953) Effective working budget for 1954.
- WHA6.9 (1953) Expanded Programme of Technical Assistance in 1953. Cited by: WHA7.39, WHA7.40.
- WHA6.10 (1953) Study on scale of assessments.
- WHA6.11 (1953) Financial report and accounts of the World Health Organization for 1952 and report of the external auditor.
- WHA6.12 (1953) Election of members entitled to designate a person to serve on the Executive Board.
- WHA6.13 (1953) Annual report of the Director-General for 1952.
- WHA6.14 (1953) Medical use of diacetylmorphine (heroin).
- WHA6.15 (1953) Selection of non-proprietary names for drugs. Cited by: WHA7.8.
- WHA6.16 (1953) Standardization of laboratory tests of foods.
- WHA6.17 (1953) Programme in dentistry.
- WHA6.18 (1953) Study on campaign against smallpox. Cited by: WHA7.5, WHA11.54.
- WHA6.19 (1953) Expert Committee on Leprosy: first report.
- WHA6.20 (1953) Terms of reference of the Committee on International Quarantine. Cites: WHA4.78, WHA4.79, WHA4.80, WHA4.81, WHA4.82, WHA4.83.
- WHA6.21 (1953) Organizational study on education and training. Cites: WHA5.63.
- WHA6.22 (1953) Organizational study on programme analysis and evaluation.
- WHA6.23 (1953) Decisions of the United Nations General Assembly and of the Economic and Social Council.
- WHA6.24 (1953) Development and concentration of efforts in the social field.
- WHA6.25 (1953) Extension of agreement with the United Nations Relief and Works Agency for Palestine refugees in the Near East. Cites: WHA5.72. Cited by: WHA7.11.
- WHA6.26 (1953) Approval of the regular programme for 1954.
- WHA6.27 (1953) Technical Assistance Programme for 1954.
- WHA6.28 (1953) Appropriation resolution for the financial year 1954.

Wernli, Falcone et al. BMJ Global Health, version 21.03.2023

- WHA6.29 (1953) Working capital fund for 1954.
- WHA6.30 (1953) Scale of assessments for 1954.
- WHA6.31 (1953) Arrears of contributions to the World Health Organization. Cited by: WHA7.19.
- WHA6.32 (1953) Arrears of contributions due in respect of the Office international d'Hygiène publique. Cited by: WHA8.15.
- WHA6.33 (1953) Sale and distribution of WHO publications: use of revolving fund.
- WHA6.34 (1953) World health seals.
- WHA6.35 (1953) Maintenance and travel costs of national candidates attending national training courses organized with the help of WHO.
- WHA6.36 (1953) Headquarters accommodation.
- WHA6.37 (1953) Request by the government of Spain concerning the Spanish protectorate zone in Morocco. Cites: WHA5.16. Cited by: WHA8.29.
- WHA6.38 (1953) Rights and obligations of associate members. Cites: WHA2.103. Cited by: WHA7.28.
- WHA6.39 (1953) Approval of the host agreement with the government of France.
- WHA6.40 (1953) Preparatory study on international medical law.
- WHA6.41 (1953) Place of the seventh World Health Assembly.
- WHA6.42 (1953) Place of the eighth World Health Assembly: invitation from the government of Mexico.
- WHA6.43 (1953) Reservations to the International Sanitary Regulations (WHO regulations no. 2) in respect of overseas and outlying territories.
- WHA6.44 (1953) Regionalization.
- WHA6.45 (1953) Assignment to regions. Cited by: WHA6.46.
- WHA6.46 (1953) Provisional assignment of specific territories to regions. Cites: WHA6.45.
- WHA6.47 (1953) Eastern Mediterranean region. Cited by: WHA7.33, WHA22.28.
- WHA6.48 (1953) Assignment of Nepal to the South-East Asia region.
- WHA6.49 (1953) Relations with non-governmental organizations.
- WHA6.50 (1953) Amendments to the rules of procedure of the World Health Assembly.
- WHA6.51 (1953) Participation of member states in certain costs incurred by WHO. Cites: WHA5.59.
- WHA6.52 (1953) Amendments to staff rules.
- WHA6.53 (1953) Cost-of-living adjustments.
- WHA6.54 (1953) Appointment of members to WHO Staff Pension Committee.
- WHA6.55 (1953) Annual report of the United Nations Joint Staff Pension Board for 1951 and report on the second actuarial valuation of the fund.
- WHA6.56 (1953) Special benefit for retiring Director-General.
- WHA6.57 (1953) Frequency of Health Assembly sessions. Cites: WHA3.96. Cited by: WHA11.25, WHA32.26.
- WHA6.58 (1953) Duration of Health Assembly sessions.
- WHA6.59 (1953) Reports of the Executive Board on its tenth and eleventh sessions.
- WHA6.60 (1953) Technical discussions at future Health Assemblies. Cited by: WHA7.31.
- WHA6.61 (1953) Co-ordination with the United Nations and specialized agencies on administration and financial matters.
- WHA7.1 (1954) Establishment of main committees.
- WHA7.2 (1954) Terms of reference of the main committees.
- WHA7.3 (1954) Award of the Léon Bernard Foundation medal and prize.
- WHA7.4 (1954) Budget level and effective working budget for 1955.
- WHA7.5 (1954) Campaigns against smallpox. Cites: WHA6.18. Cited by: WHA8.38, WHA11.54.
- WHA7.6 (1954) Functions of the World Health Organization in respect of conventions on addiction-producing drugs. Cited by: WHA12.24, WHA18.46, WHA30.18.
- WHA7.7 (1954) 1931 Convention on Narcotic Drugs: interpretation of convertible substances.
- WHA7.8 (1954) Procedure for selection of recommended international non-proprietary names for drugs. Cites: WHA6.15.

Wernli, Falcone et al. BMJ Global Health, version 21.03.2023

- WHA7.9 (1954) General programme of work for a specific period.
- WHA7.10 (1954) Organizational study on programme analysis and evaluation.
- WHA7.11 (1954) Extension of agreement with the United Nations Relief and Works Agency for Palestine Refugees in the Near East. Cites: WHA6.25. Cited by: WHA8.46.
- WHA7.12 (1954) Election of members entitled to designate a person to serve on the Executive Board.
- WHA7.13 (1954) Admission of the Federation of Rhodesia and Nyasaland as an associate member of the World Health Organization.
- WHA7.14 (1954) Host agreement with the government of Egypt.
- WHA7.15 (1954) Scales of assessment for 1955, 1956, 1957 and 1958. Cited by: WHA8.5.
- WHA7.16 (1954) Future scales of assessment. Cited by: WHA8.5.
- WHA7.17 (1954) Assessment of China. Cites: WHA6.6.
- WHA7.18 (1954) Request concerning the contribution of the Spanish Protectorate Zone in Morocco.
- WHA7.19 (1954) Status of collection of annual contributions and of advances to the working capital fund. Cites: WHA6.31.
- WHA7.20 (1954) Arrears of contributions in respect of the Office international d'Hygiène publique.
- WHA7.21 (1954) Working capital fund for 1955.
- WHA7.22 (1954) Publications revolving fund.
- WHA7.23 (1954) Special fund for World Health seals.
- WHA7.24 (1954) Establishment of Executive Board special fund. Cited by: WHA11.5, WHA24.11, WHA29.29.
- WHA7.25 (1954) Financial report and accounts for 1953 and report of the external auditor.
- WHA7.26 (1954) Sessions of regional committees at regional headquarters. Cited by: WHA9.20.
- WHA7.27 (1954) Payment of travel expenses of representatives in sessions of regional committees.
- WHA7.28 (1954) Rights and obligations of associate members in regional committees. Cites: WHA2.103, WHA6.38.
- WHA7.29 (1954) Place of eighth World Health Assembly.
- WHA7.30 (1954) Revision of rules of procedure of the World Health Assembly.
- WHA7.31 (1954) Technical discussions at future Health Assemblies. Cites: WHA6.60.
- WHA7.32 (1954) Additional use of the Spanish language.
- WHA7.33 (1954) Regional Committee for the Eastern Mediterranean. Cites: WHA6.47. Cited by: WHA8.23, WHA9.53, WHA10.52, WHA11.21, WHA22.28, WHA23.30.
- WHA7.34 (1954) Appropriation resolution for the financial year 1955.
- WHA7.35 (1954) Programme and budget for 1955. Cited by: WHA8.12.
- WHA7.36 (1954) Form of presentation of annual programme and budget estimates. Cites: WHA3.107, WHA4.10, WHA4.18, WHA4.56, WHA4.74. Cited by: WHA22.27.
- WHA7.37 (1954) Procedure for the consideration by the Executive Board of the 1956 programme and budget estimates.
- WHA7.38 (1954) Procedure for the consideration by the eighth World Health Assembly of the 1956 programme and budget estimates.
- WHA7.39 (1954) Legislative developments in the Technical Assistance Programme. Cites: WHA6.9.
- WHA7.40 (1954) Modifications in the Technical Assistance Programme for 1954. Cites: WHA6.9.
- WHA7.41 (1954) Technical Assistance Programme for 1955. Cited by: WHA9.55.
- WHA7.42 (1954) Local costs in respect of international project personnel under the regular budget. Cites: WHA5.59.
- WHA7.43 (1954) Local costs in respect of international project personnel under the Technical Assistance Programme.
- WHA7.44 (1954) Appointment of the external auditor for the years 1955-1957.
- WHA7.45 (1954) Cost-of-living adjustments.
- WHA7.46 (1954) Appointment of representatives on WHO Staff Pension Committee.
- WHA7.47 (1954) Annual report of the United Nations Joint Staff Pension Board.
- WHA7.48 (1954) Amendments to staff rules.

Wernli, Falcone et al. BMJ Global Health, version 21.03.2023

- WHA7.49 (1954) Accommodation for Headquarters office. Cites: WHA4.40.
- WHA7.50 (1954) Relations with UNICEF. Cited by: WHA8.12.
- WHA7.51 (1954) Decisions of the United Nations General Assembly and Economic and Social Council.
- WHA7.52 (1954) Research. Cites: WHA2.19. Cited by: WHA25.60.
- WHA7.53 (1954) Environmental sanitation.
- WHA7.54 (1954) Annual report of the Director-General for 1953.
- WHA7.55 (1954) Reports of the Executive Board on its twelfth and thirteenth sessions.
- WHA7.56 (1954) International Sanitary Regulations: first report of the Committee on International Quarantine. Cites: WHA4.82. Cited by: WHA12.20.
- WHA7.57 (1954) Reservations to the International Sanitary Regulations (WHO regulations no.2) in respect of overseas and outlying territories.
- WHA8.1 (1955) Establishment of main committees.
- WHA8.2 (1955) Terms of reference of the main committees.
- WHA8.3 (1955) Award of the Léon Bernard Foundation medal and prize. Cited by: WHA9.61.
- WHA8.4 (1955) Election of members entitled to designate a person to serve on the Executive Board.
- WHA8.5 (1955) Scales of assessment. Cites: WHA7.15, WHA7.16. Cited by: WHA9.14, WHA9.17, WHA10.9, WHA10.10, WHA12.7, WHA15.13, WHA16.10, WHA22.6, WHA24.12, WHA24.13, WHA25.10, WHA26.21, WHA29.15, WHA30.5, WHA30.6, WHA31.15, WHA32.6, WHA32.7, WHA33.9, WHA33.10, WHA33.11, WHA33.14, WHA34.6, WHA35.6, WHA35.7, WHA35.8, WHA36.7, WHA36.8, WHA37.8, WHA37.9, WHA38.5, WHA38.6, WHA39.9, WHA43.22, WHA44.18, WHA45.11, WHA45.13, WHA45.14, WHA45.15, WHA46.12, WHA47.22, WHA50.9, WHA54.9.
- WHA8.6 (1955) Financial report of WHO for 1954 and report of the external auditor.
- WHA8.7 (1955) Publications revolving fund.
- WHA8.8 (1955) Admission of the Sudan as an associate member.
- WHA8.9 (1955) Annual report of the Director-General for 1954.
- WHA8.10 (1955) Second general programme of working covering a specific period.
- WHA8.11 (1955) Effective working budget and budget level for 1956.
- WHA8.12 (1955) Relations with UNICEF. Cites: WHA7.35, WHA7.50. Cited by: WHA9.35.
- WHA8.13 (1955) Status of collection of annual contributions and of advances to the working capital fund. Cited by: WHA9.18, WHA10.30, WHA11.11, WHA12.11, WHA13.47, WHA14.3, WHA15.9, WHA16.20, WHA18.21, WHA19.29, WHA20.31, WHA21.6, WHA22.14, WHA24.9, WHA28.18, WHA33.7, WHA37.6, WHA39.16, WHA41.7, WHA54.6.
- WHA8.14 (1955) WHO seals.
- WHA8.15 (1955) Arrears of contributions due in respect of the Office international d'Hygiène publique. Cites: WHA6.32.
- WHA8.16 (1955) Appointment of representatives to the WHO Staff Pension Committee.
- WHA8.17 (1955) Annual report of the United Nations Joint Staff Pension Board.
- WHA8.18 (1955) Accession to the Convention on the Privileges and Immunities of the Specialized Agencies.
- WHA8.19 (1955) Working capital fund for 1956.
- WHA8.20 (1955) Public information activities.
- WHA8.21 (1955) Special fund for improving national health services. Cites: WHA5.61. Cited by: WHA9.24.
- WHA8.22 (1955) Methods of recruitment for posts in WHO.
- WHA8.23 (1955) Implementation of WHA7.33. Cites: WHA7.33. Cited by: WHA9.53.
- WHA8.24 (1955) Establishment of the Regional Office for Europe in Copenhagen: host agreement with the government of Denmark.
- WHA8.25 (1955) Place of the ninth World Health Assembly.
- WHA8.26 (1955) Amendments to the rules of procedure of the World Health Assembly.
- WHA8.27 (1955) Interpretation of certain rules of procedure of the World Health Assembly.
- WHA8.28 (1955) Procedural problems related to constitutional amendments.

Wernli, Falcone et al. BMJ Global Health, version 21.03.2023

- WHA8.29 (1955) Confirmation of resolution WHA6.37 and admission of the Spanish protectorate zone in Morocco as associate member (item proposed by Spain and the Spanish protectorate zone in Morocco): contribution of the Spanish protectorate zone in Morocco. Cites: WHA6.37.
- WHA8.30 (1955) Malaria eradication. Cited by: WHA10.20, WHA10.32, WHA11.17, WHA11.42, WHA12.15, WHA15.34, WHA17.25, WHA17.26, WHA74.9.
- WHA8.31 (1955) Approved 1955 Technical Assistance Programme and the financial situation for 1955.
- WHA8.32 (1955) Planning for the 1956 Technical Assistance Programme.
- WHA8.33 (1955) Legislative developments in the United Nations Expanded Programme of Technical Assistance.
- WHA8.34 (1955) Atomic energy.
- WHA8.35 (1955) Second report of the Committee on International Quarantine.
- WHA8.36 (1955) Additional regulations of 26 May 1955 amending the International Sanitary Regulations.
- WHA8.37 (1955) Appropriation resolution for the financial year 1956.
- WHA8.38 (1955) Campaigns against smallpox. Cites: WHA7.5. Cited by: WHA11.54.
- WHA8.39 (1955) Selection of recommended international non-proprietary names for pharmaceutical preparations.
- WHA8.40 (1955) Reports on the world health situation. Cited by: WHA9.27.
- WHA8.41 (1955) Organizational study on programme analysis and evaluation.
- WHA8.42 (1955) Future organizational study: programme planning. Cites: WHA4.27.
- WHA8.43 (1955) Technical discussions at future World Health Assemblies.
- WHA8.44 (1955) Co-ordination with the United Nations and specialized agencies on administrative and budgetary questions.
- WHA8.45 (1955) Decisions of United Nations organs and specialized agencies.
- WHA8.46 (1955) Extension of the agreement with the United Nations Relief and Works Agency for Palestine Refugees in the Near East. Cites: WHA7.11. Cited by: WHA13.62.
- WHA8.47 (1955) Reports of the Executive Board on its fourteenth and fifteenth sessions.
- WHA9.1 (1956) Establishment of main committees.
- WHA9.2 (1956) Terms of reference of the main committees.
- WHA9.3 (1956) Admission of Morocco as a member.
- WHA9.4 (1956) Admission of Sudan as a member.
- WHA9.5 (1956) Admission of Tunisia as a member.
- WHA9.6 (1956) Admission of the Gold Coast as an associate member.
- WHA9.7 (1956) Admission of the Federation of Nigeria as an associate member.
- WHA9.8 (1956) Admission of Sierra Leone as an associate member.
- WHA9.9 (1956) Resumption by certain members of active participation in the World Health Organization. Cited by: WHA45.23.
- WHA9.10 (1956) Report of the Léon Bernard Foundation Committee.
- WHA9.11 (1956) Election of members entitled to designate a person to serve on the Executive Board.
- WHA9.12 (1956) Financial report of WHO for 1955 and report of the external auditor.
- WHA9.13 (1956) Publications revolving fund.
- WHA9.14 (1956) Assessments of Austria, Burma and Ceylon. Cites: WHA8.5.
- WHA9.15 (1956) Assessment of Korea.
- WHA9.16 (1956) Assessments of Morocco, Sudan, Tunisia; Gold Coast, Federation of Nigeria, and Sierra Leone.
- WHA9.17 (1956) Scale of assessment for 1957. Cites: WHA8.5.
- WHA9.18 (1956) Status of collection of annual contributions and of advances to the working capital fund. Cites: WHA8.13.
- WHA9.19 (1956) Working capital fund for 1957.
- WHA9.20 (1956) Sessions of regional committees away from regional headquarters. Cites: WHA7.26.



Wernli, Falcone et al. BMJ Global Health, version 21.03.2023

- WHA9.21 (1956) Co-ordination with the United Nations and specialized agencies on administrative and financial questions.
- WHA9.22 (1956) Decisions of United Nations organs and specialized agencies.
- WHA9.23 (1956) Correction of the French and Spanish texts of resolution WHA1.133. Cites: WHA1.133.
- WHA9.24 (1956) Special fund for improving national health services. Cites: WHA8.21.
- WHA9.25 (1956) Use of Arabic in the Regional Committee for the Eastern Mediterranean.
- WHA9.26 (1956) Annual report of the Director-General for 1955.
- WHA9.27 (1956) Reports on the world health situation. Cites: WHA8.40. Cited by: WHA11.38.
- WHA9.28 (1956) Special report to celebrate the tenth anniversary of the World Health Organization.
- WHA9.29 (1956) Seventh revision of the International Lists of Disease and Causes of Death.
- WHA9.30 (1956) Future organizational studies by the Executive Board. Cited by: WHA10.35, WHA28.32.
- WHA9.31 (1956) Cardiovascular diseases and hypertension.
- WHA9.32 (1956) Effective working budget and budget level for 1957.
- WHA9.33 (1956) Fixation of minimum educational standards on an international basis for doctors.
- WHA9.34 (1956) Future policy on financial support to the Council for International Organizations of Medical Sciences (CIOMS). Cites: WHA2.5.
- WHA9.35 (1956) Relations with UNICEF. Cites: WHA8.12.
- WHA9.36 (1956) Place of meeting of the tenth World Health Assembly.
- WHA9.37 (1956) Approval of host agreement with the government of Denmark concerning the Regional Office for Europe.
- WHA9.38 (1956) Relations between the International Bureau for the Protection of Industrial Property and the World Health Organization.
- WHA9.39 (1956) Spanish text of the rules of procedure of the World Health Assembly.
- WHA9.40 (1956) Appointment of representatives to the WHO Pension Committee.
- WHA9.41 (1956) Annual report of the United Nations Joint Staff Pension Board.
- WHA9.42 (1956) Assignment of Tunisia to the Eastern Mediterranean Region.
- WHA9.43 (1956) Provisional assignment of Morocco to the European Region.
- WHA9.44 (1956) Procedural problems relating to constitutional amendments.
- WHA9.45 (1956) Inter-regional conference on leprosy control, 1958.
- WHA9.46 (1956) Third report of the Committee on International Quarantine.
- WHA9.47 (1956) Reservations to the International Sanitary Regulations.
- WHA9.48 (1956) Additional regulations of 23 May 1956 amending the International Sanitary Regulations with respect to the sanitary control of pilgrim traffic.
- WHA9.49 (1956) Additional regulations of 23 May 1956 amending the International Sanitary Regulations with respect to the form of the International Certificate of Vaccination or Revaccination against Smallpox. Cited by: WHA11.54.
- WHA9.50 (1956) Technical discussions at future Health Assemblies.
- WHA9.51 (1956) Proposed amendment to the Constitution to increase the number of members entitled to designate a person to serve on the Executive Board (articles 24 and 25).
- WHA9.52 (1956) Rights and obligations of associate members and other territories in the World Health Assembly and Executive Board, and in the regional organizations.
- WHA9.53 (1956) Implementation of resolution WHA7.33. Cites: WHA7.33, WHA8.23.
- WHA9.54 (1956) Peaceful uses of atomic energy. Cited by: WHA11.50.
- WHA9.55 (1956) Approved 1956 Technical Assistance Programme and the financial situation for 1956. Cites: WHA7.41.
- WHA9.56 (1956) Local costs arrangements: Expanded Programme of Technical Assistance.
- WHA9.57 (1956) Legislative developments in the United Nations Expanded Programme of Technical Assistance.
- WHA9.58 (1956) Planning for the 1957 Technical Assistance Programme.

Wernli, Falcone et al. BMJ Global Health, version 21.03.2023

- WHA9.59 (1956) Appropriation resolution for the financial year 1957. Cited by: WHA10.7.
- WHA9.60 (1956) Progress and evaluation of production of typhoid, smallpox and triple diphtheria-pertussis-tetanus vaccines.
- WHA9.61 (1956) Malaria eradication. Cites: WHA8.3. Cited by: WHA10.32.
- WHA9.62 (1956) Fixing of target dates for starting inter-regional co-ordinated programmes for malaria control leading to eradication.
- WHA9.63 (1956) Reports of the Executive Board on its sixteenth and seventeenth sessions.
- WHA10.1 (1957) Establishment of the main committees.
- WHA10.2 (1957) Terms of reference of the main committees.
- WHA10.3 (1957) Award of the Léon Bernard Foundation medal and prize. Cited by: WHA10.38.
- WHA10.4 (1957) Use of the Russian language at World Health Assemblies.
- WHA10.5 (1957) Election of members entitled to designate a person to serve on the Executive Board.
- WHA10.6 (1957) Financial report of WHO for 1956 and report of the external auditor.
- WHA10.7 (1957) Reimbursement of the working capital fund (supplementary estimates for 1957). Cites: WHA9.59.
- WHA10.8 (1957) Singapore fund.
- WHA10.9 (1957) Assessment of Ghana. Cites: WHA8.5. Cited by: WHA11.7.
- WHA10.10 (1957) Scale of assessment for 1958. Cites: WHA8.5.
- WHA10.11 (1957) Working capital fund for 1958.
- WHA10.12 (1957) Special fund for improving national health services.
- WHA10.13 (1957) Appointment of external auditor for the years 1958-60.
- WHA10.14 (1957) Annual report of the Director-General for 1956.
- WHA10.15 (1957) Effective working budget and budget level for 1958.
- WHA10.16 (1957) Fourth report of the Committee on International Quarantine and reservations to the additional regulations of 23 May 1956 amending the International Sanitary Regulations.
- WHA10.17 (1957) Health and vital statistics. Cited by: WHA11.41.
- WHA10.18 (1957) Epidemiology of cancer.
- WHA10.19 (1957) WHO participation in the Expanded Programme of Technical Assistance.
- WHA10.20 (1957) Relations with UNICEF. Cites: WHA8.30.
- WHA10.21 (1957) Peaceful uses of atomic energy.
- WHA10.22 (1957) Resumption by certain members of active participation in the World Health Organization.
- WHA10.23 (1957) Publication of the Russian edition of the Chronicle.
- WHA10.24 (1957) Rights and obligations of associate members and other territories in the World Health Assembly and the Executive Board and in the regional organizations.
- WHA10.25 (1957) Review of World Health Organization agreements with other specialized agencies.
- WHA10.26 (1957) Amendment of Annex VII to the Convention on Privileges and Immunities of the Specialized Agencies.
- WHA10.27 (1957) Assembly procedure for examining the programme, budget and ancillary administrative, financial and personnel matters. Cited by: WHA11.20.
- WHA10.28 (1957) Accommodation for the Regional Office for the Western Pacific.
- WHA10.29 (1957) Criteria for provision of regional office accommodation.
- WHA10.30 (1957) Status of collection of annual contributions and of advances to the working capital fund. Cites: WHA8.13.
- WHA10.31 (1957) Renewal of the contract of the Director-General. Cites: WHA6.2. Cited by: WHA11.10, WHA12.47.
- WHA10.32 (1957) Malaria eradication. Cites: WHA8.30, WHA9.61. Cited by: WHA17.22.
- WHA10.33 (1957) Procedure for technical discussions at future World Health Assemblies.
- WHA10.34 (1957) Technical discussions at the twelfth World Health Assembly. Cites: WHA10.42.
- WHA10.35 (1957) Organizational study on regionalization by the Executive Board. Cites: WHA9.30.
- WHA10.36 (1957) Future organizational studies by the Executive Board. Cited by: WHA35.11.

Wernli, Falcone et al. BMJ Global Health, version 21.03.2023

- WHA10.37 (1957) Progress in the evaluation and production of typhoid, smallpox and triple diphtheria-pertussis-tetanus vaccines.
- WHA10.38 (1957) Appropriation resolution for the financial year 1958. Cites: WHA10.3.
- WHA10.39 (1957) Participation by WHO in broad programmes of the United Nations and the specialized agencies in the social and economic fields.
- WHA10.40 (1957) Decisions of United Nations organs and specialized agencies affecting WHO's activities.
- WHA10.41 (1957) Convention of the International Labour Organisation relating to the protection and integration of indigenous and other tribal and semi-tribal populations in independent countries.
- WHA10.42 (1957) Celebration of the tenth anniversary of WHO. Cited by: WHA10.34.
- WHA10.43 (1957) Reimbursement of travel expenses of delegates attending the celebration of the tenth anniversary of WHO. Cites: WHA2.46.
- WHA10.44 (1957) Amendments to the rules of procedure of the Health Assembly.
- WHA10.45 (1957) Amendment to the rules of procedure for expert committees and their sub-committees.
- WHA10.46 (1957) Appointment of representatives to the WHO Staff Pension Committee.
- WHA10.47 (1957) Annual report of the United Nations Joint Staff Pension Fund.
- WHA10.48 (1957) Review of salaries, allowances and benefits.
- WHA10.49 (1957) Review of salaries, allowances and benefits: region of the Americas.
- WHA10.50 (1957) Co-ordination with and decisions of the United Nations and specialized agencies on administrative, financial and legal questions.
- WHA10.51 (1957) Place of the eleventh World Health Assembly.
- WHA10.52 (1957) Implementation of resolution WHA7.33. Cites: WHA7.33.
- WHA10.53 (1957) Reports of the Executive Board on its eighteenth and nineteenth sessions.
- WHA11.1 (1958) Establishment of main committees.
- WHA11.2 (1958) Terms of reference of the main committees.
- WHA11.3 (1958) Award of the Léon Bernard Foundation medal and prize.
- WHA11.4 (1958) Election of a member state to fill a vacancy on the Executive Board resulting from the establishment of the United Arab Republic.
- WHA11.5 (1958) Reimbursement of the Executive Board special fund. Cites: WHA7.24.
- WHA11.6 (1958) Status of the publications revolving fund.
- WHA11.7 (1958) Assessment of Ghana. Cites: WHA10.9.
- WHA11.8 (1958) Assessment of the Federation of Malaya.
- WHA11.9 (1958) Financial report of WHO for 1957 and report of the external auditor.
- WHA11.10 (1958) Renewal of the contract of the Director-General. Cites: WHA10.31.
- WHA11.11 (1958) Status of collection of annual contributions and of advances to the working capital fund. Cites: WHA8.13.
- WHA11.12 (1958) Working capital fund for 1959.
- WHA11.13 (1958) Amendments to staff rules.
- WHA11.14 (1958) Amendment to working principles governing the admission of non-governmental organizations into official relations with WHO. Cited by: WHA40.25.
- WHA11.15 (1958) Place of meeting of the twelfth World Health Assembly.
- WHA11.16 (1958) Malaria eradication special account.
- WHA11.17 (1958) Report of the Committee on Malaria Eradication. Cites: WHA8.30.
- WHA11.18 (1958) Co-ordination with and decisions of the United Nations and specialized agencies on administrative and financial questions.
- WHA11.19 (1958) Co-ordination with and decisions of the United Nations and specialized agencies on administrative and financial questions (post-adjustment--Geneva).
- WHA11.20 (1958) Assembly procedures for examining the programme, budget, and ancillary administrative, financial and personnel matters. Cites: WHA10.27.
- WHA11.21 (1958) Implementation of resolution WHA7.33. Cites: WHA7.33.

Wernli, Falcone et al. BMJ Global Health, version 21.03.2023

- WHA11.22 (1958) Annual report of the United Nations Joint Staff Pension Board for 1956.
- WHA11.23 (1958) Headquarters accommodation.
- WHA11.24 (1958) Amendments to the rules of procedure of the World Health Assembly: rules 92 and 99.
- WHA11.25 (1958) Frequency of World Health Assemblies. Cites: WHA6.57. Cited by: WHA32.26.
- WHA11.26 (1958) Annual report of the Director-General for 1957.
- WHA11.27 (1958) Environmental sanitation.
- WHA11.28 (1958) Effective working budget and budget level for 1959.
- WHA11.29 (1958) Election of members entitled to designate a person to serve on the Executive Board.
- WHA11.30 (1958) Revision of annex VII to the Convention on the Privileges and Immunities of Specialized Agencies.
- WHA11.31 (1958) Possibility of action being taken under the aegis of WHO regarding the application of the 1949 Geneva Humanitarian Conventions (proposal of the government of Morocco). Cited by: WHA20.54.
- WHA11.32 (1958) Accommodation for the Regional Office for the Western Pacific.
- WHA11.33 (1958) Scale of assessment for 1959.
- WHA11.34 (1958) Appointment of representatives to the WHO Staff Pension Committee.
- WHA11.35 (1958) Plan for an intensified research programme. Cited by: WHA12.17, WHA25.60.
- WHA11.36 (1958) Amendments to the rules of procedure of the World Health Assembly: rule 67.
- WHA11.37 (1958) Review and appraisal of WHO fellowships.
- WHA11.38 (1958) First report on the world health situation. Cites: WHA9.27. Cited by: WHA15.43.
- WHA11.39 (1958) Report on the first ten years of the World Health Organization.
- WHA11.40 (1958) Developments in activities assisted jointly with UNICEF.
- WHA11.41 (1958) Health and vital statistics. Cites: WHA10.17.
- WHA11.42 (1958) Malaria eradication programme. Cites: WHA8.30.
- WHA11.43 (1958) Co-operation with United Nations and specialized agencies.
- WHA11.44 (1958) Fifth report of the Committee on International Quarantine. Cited by: WHA15.38.
- WHA11.45 (1958) Position of states and territories under the International Sanitary Regulations.
- WHA11.46 (1958) Periodicity of meetings of the Committee on International Quarantine.
- WHA11.47 (1958) Appropriation resolution for the financial year 1959. Cited by: WHA12.44.
- WHA11.48 (1958) WHO participation in the Expanded Programme of Technical Assistance.
- WHA11.49 (1958) International agreement of Brussels, 1924, respecting facilities to be given to merchant seamen for the treatment of venereal diseases. Cites: WHA1.22. Cited by: WHA12.23.
- WHA11.50 (1958) Peaceful uses of atomic energy. Cites: WHA9.54. Cited by: WHA13.56, WHA17.47.
- WHA11.51 (1958) Sports medicine.
- WHA11.52 (1958) Future organizational study by the Executive Board.
- WHA11.53 (1958) Special fund for improving national health services (report on resolution 1219 (XII) of the General Assembly of the United Nations on the financing of economic development).
- WHA11.54 (1958) Smallpox eradication. Cites: WHA3.18, WHA6.18, WHA7.5, WHA8.38, WHA9.49. Cited by: WHA28.52, WHA33.4.
- WHA11.55 (1958) Reports of the Executive Board on its twentieth and twenty-first sessions.
- WHA11.56 (1958) Resolution of thanks.
- WHA12.1 (1959) Establishment of main committees.
- WHA12.2 (1959) Terms of reference of the main committees.
- WHA12.3 (1959) Fourth centenary of the University of Geneva.
- WHA12.4 (1959) Election of members entitled to designate a person to serve on the Executive Board.
- WHA12.5 (1959) Financial report of WHO for 1958 and report of the external auditor.
- WHA12.6 (1959) Revolving sales fund. Cites: WHA1.92. Cited by: WHA22.8.
- WHA12.7 (1959) Scale of assessment, 1961 and future years. Cites: WHA8.5.
- WHA12.8 (1959) Working capital fund for 1960.

Wernli, Falcone et al. BMJ Global Health, version 21.03.2023

- WHA12.9 (1959) Annual report of the United Nations Joint Staff Pension Board for 1957.
- WHA12.10 (1959) Appointment of representatives to the WHO Staff Pension Committee.
- WHA12.11 (1959) Status of collection of annual contributions and of advances to the working capital fund. Cites: WHA8.13.
- WHA12.12 (1959) Headquarters accommodation. Cited by: WHA13.46.
- WHA12.13 (1959) Assessment of the Republic of Guinea. Cited by: WHA13.17.
- WHA12.14 (1959) Scale of assessment for 1960.
- WHA12.15 (1959) Malaria eradication special account. Cites: WHA8.30.
- WHA12.16 (1959) Annual report of the Director-General for 1958.
- WHA12.17 (1959) Intensified WHO medical research programme. Cites: WHA2.19, WHA4.14, WHA11.35. Cited by: WHA25.60.
- WHA12.18 (1959) Expert Committee on Hygiene and Sanitation in Aviation: first report.
- WHA12.19 (1959) Periodicity of meetings of the Committee on International Quarantine.
- WHA12.20 (1959) Position of states and territories under the International Sanitary Regulations. Cites: WHA7.56.
- WHA12.21 (1959) Committee on International Quarantine: sixth report.
- WHA12.22 (1959) WHO participation in the Expanded Programme of Technical Assistance: programme aspects.
- WHA12.23 (1959) Study of the nature and extent of the health problems of seafarers and of the health services available to them. Cites: WHA11.49.
- WHA12.24 (1959) Action in respect of international conventions on narcotic drugs: the Single Convention on Narcotic Drugs (third draft). Cites: WHA7.6.
- WHA12.25 (1959) Method of financing control pilot projects of an experimental scientific research nature. Cites: WHA2.19.
- WHA12.26 (1959) Development in activities assisted jointly with UNICEF.
- WHA12.27 (1959) General programme of work covering a specific period.
- WHA12.28 (1959) International Health and Medical Research Year.
- WHA12.29 (1959) Effective working budget and budget level for 1960.
- WHA12.30 (1959) Assembly procedures for examining the programme, budget, and ancillary administrative, financial and personnel matters.
- WHA12.31 (1959) WHO participation in the Expanded Programme of Technical Assistance: administrative and financial aspects. Cited by: WHA27.33.
- WHA12.32 (1959) Amendments to staff rules.
- WHA12.33 (1959) Amendments to staff regulations.
- WHA12.34 (1959) Accommodation for the Regional Office for South-East Asia.
- WHA12.35 (1959) Accommodation for the Regional Office for the Western Pacific.
- WHA12.36 (1959) Criteria for provision of regional office accommodation.
- WHA12.37 (1959) Co-ordination with and decisions of the United Nations and specialized agencies on administrative and financial questions.
- WHA12.38 (1959) Frequency of World Health Assemblies. Cited by: WHA32.26, WHA34.28.
- WHA12.39 (1959) Amendments to the rules of procedure of the World Health Assembly.
- WHA12.40 (1959) Agreement between the World Health Organization and the International Atomic Energy Agency.
- WHA12.41 (1959) Convention on the privileges and immunities of the specialized agencies: specification of categories of officials under section 18 of article VI of the Convention.
- WHA12.42 (1959) Convention on the privileges and immunities of the specialized agencies: status of accessions to the Convention and to its annex VII.
- WHA12.43 (1959) Amendment to articles 24 and 25 of the Constitution: increase in the number of members entitled to designate a person to serve on the Executive Board. Cited by: WHA13.32.
- WHA12.44 (1959) Supplementary budget estimates for 1959. Cites: WHA11.47.
- WHA12.45 (1959) Place of meeting of the thirteenth World Health Assembly.

Wernli, Falcone et al. BMJ Global Health, version 21.03.2023

- WHA12.46 (1959) Consideration of amalgamation of special accounts into a single fund.
- WHA12.47 (1959) Renewal of the contract of the Director-General. Cites: WHA10.31. Cited by: WHA13.39.
- WHA12.48 (1959) Environmental sanitation.
- WHA12.49 (1959) Malaria eradication programme.
- WHA12.50 (1959) Appropriation resolution for the financial year 1960.
- WHA12.51 (1959) Report on the establishment of the special fund by the General Assembly of the United Nations (resolutions 1219 (XII) and 1240 (XIII)).
- WHA12.52 (1959) Co-operation with the United Nations and specialized agencies.
- WHA12.53 (1959) Resolution 680 B II (XXVI) of the Economic and Social Council: ritual operations.
- WHA12.54 (1959) Smallpox eradication.
- WHA12.55 (1959) Organizational study on publications.
- WHA12.56 (1959) Report of the Executive Board on its twenty-second and twenty-third sessions.
- WHA13.1 (1960) Terms of reference of the main committees. Cited by: WHA14.51.
- WHA13.2 (1960) Admission of new members: Cameroun.
- WHA13.3 (1960) Admission of new members: Republic of Togo.
- WHA13.4 (1960) Admission of new associate members: Cyprus.
- WHA13.5 (1960) Admission of new associate members: Central African Republic.
- WHA13.6 (1960) Admission of new associate members: Republic of the Congo.
- WHA13.7 (1960) Admission of new associate members: Republic of the Ivory Coast.
- WHA13.8 (1960) Admission of new associate members: Gabon Republic.
- WHA13.9 (1960) Admission of new associate members: Republic of the Upper Volta.
- WHA13.10 (1960) Admission of new associate members: Republic of the Niger.
- WHA13.11 (1960) Admission of new members: Kuwait.
- WHA13.12 (1960) Admission of new associate members: Mali Federation.
- WHA13.13 (1960) Financial report of WHO for 1959 and report of the external auditor.
- WHA13.14 (1960) Place of meeting of the fourteenth World Health Assembly.
- WHA13.15 (1960) Publications in Russian.
- WHA13.16 (1960) Assessment for 1960 and 1961 of new members (Cameroun, Kuwait, the Republic of Togo) and associate members. Cited by: WHA21.9, WHA25.53, WHA26.21, WHA27.39.
- WHA13.17 (1960) Assessment of the Republic of Guinea for 1960. Cites: WHA12.13.
- WHA13.18 (1960) Scale of assessment for 1961.
- WHA13.19 (1960) Amendments to the financial regulations.
- WHA13.20 (1960) Amendments to the financial rules.
- WHA13.21 (1960) Amendments to the staff rules.
- WHA13.22 (1960) Special account for medical research; special account for community water supply programme.
- WHA13.23 (1960) Special account for smallpox eradication.
- WHA13.24 (1960) Amalgamation of special accounts into a single fund. Cited by: WHA15.22, WHA17.25, WHA26.24, WHA29.31.
- WHA13.25 (1960) Accommodation for the Regional Office for South-East Asia.
- WHA13.26 (1960) Adoption of a WHO flag.
- WHA13.27 (1960) Election of members entitled to designate a person to serve on the Executive Board.
- WHA13.28 (1960) Effective working budget and budget level for 1961.
- WHA13.29 (1960) Assistance to new members and associate members in 1961.
- WHA13.30 (1960) Appointment of the external auditor.
- WHA13.31 (1960) Special fund of the United Nations.
- WHA13.32 (1960) Amendments to the Constitution: increase in the membership of the Executive Board. Cites: WHA12.43.
- WHA13.33 (1960) Annual report of the United Nations Joint Staff Pension Board for 1958.



Wernli, Falcone et al. BMJ Global Health, version 21.03.2023

- WHA13.34 (1960) Appointment of representatives to the WHO Staff Pension Committee.
- WHA13.35 (1960) Assembly procedures for examining the programme, budget and ancillary administrative, financial and personnel matters.
- WHA13.36 (1960) Establishment of national public health cadres.
- WHA13.37 (1960) Annual report of the Director-General for 1959.
- WHA13.38 (1960) Appropriation resolution for the financial year 1961. Cited by: WHA14.13.
- WHA13.39 (1960) Renewal of the contract of the Director-General. Cites: WHA12.47.
- WHA13.40 (1960) Possibilities of reducing the length of World Health Assemblies. Cited by: WHA14.51.
- WHA13.41 (1960) Scale of assessment for and amount of the working capital fund. Cited by: WHA14.22, WHA15.14, WHA15.30, WHA16.9, WHA17.23.
- WHA13.42 (1960) Headquarters accommodation: reimbursement by the United Nations.
- WHA13.43 (1960) Amendments to the rules of procedure of the Health Assembly, and adoption of transitional provisions connected with the increase in the membership of the Executive Board.
- WHA13.44 (1960) Decisions of the United Nations, specialized agencies and the International Atomic Energy Agency affecting WHO's activities on administrative and financial questions.
- WHA13.45 (1960) Malaria eradication special account. Cited by: WHA14.15.
- WHA13.46 (1960) Headquarters accommodation. Cites: WHA12.12. Cited by: WHA16.22.
- WHA13.47 (1960) Status of collection of annual contributions and of advances to the working capital fund. Cites: WHA8.13.
- WHA13.48 (1960) Relations with the League of Arab States.
- WHA13.49 (1960) Procedure for the review by the Executive Board of report of expert committees. Cited by: WHA35.10.
- WHA13.50 (1960) Action in respect of international conventions on narcotic drugs: The Single Convention on Narcotic Drugs (third draft).
- WHA13.51 (1960) Study of the nature and extent of health problems of seafarers and the health services available to them. Cited by: WHA15.21.
- WHA13.52 (1960) Venereal disease treatment of seafarers (Brussels agreement of 1924).
- WHA13.53 (1960) Smallpox eradication.
- WHA13.54 (1960) Vector-borne diseases and malaria eradication.
- WHA13.55 (1960) Malaria eradication programme. Cited by: WHA17.22.
- WHA13.56 (1960) Radiation health including protection of mankind from ionizing radiation hazards, whatever their source. Cites: WHA11.50. Cited by: WHA14.56, WHA17.47, WHA19.39, WHA34.38, WHA39.19.
- WHA13.57 (1960) Third general programme of work covering a specific period: 1962-1965 inclusive.
- WHA13.58 (1960) Committee on International Quarantine: seventh report.
- WHA13.59 (1960) Additional regulations of 19 May 1960 amending the International Sanitary Regulations with respect to the health part of the Aircraft General Declaration.
- WHA13.60 (1960) Organizational study on publications.
- WHA13.61 (1960) Future organizational study to be made by the Executive Board.
- WHA13.62 (1960) Extension of the agreement with the United Nations Relief and Works Agency for Palestine refugees in the Near East. Cites: WHA8.46. Cited by: WHA16.41.
- WHA13.63 (1960) UNICEF/WHO jointly assisted activities.
- WHA13.64 (1960) Intensified programme of medical research. Cited by: WHA25.60.
- WHA13.65 (1960) World Health Year.
- WHA13.66 (1960) Decisions of the United Nations, specialized agencies and the International Atomic Energy Agency affecting WHO's activities.
- WHA13.67 (1960) WHO's activities in promotion of health in connexion with the resolution concerning general and complete disarmament adopted by the United Nations General Assembly at its fourteenth session. Cited by: WHA34.38, WHA39.19.

Wernli, Falcone et al. BMJ Global Health, version 21.03.2023

- WHA13.68 (1960) International encouragement of scientific research into the control of cancerous diseases (resolution 1398 (XIV) of the United Nations General Assembly). Cited by: WHA14.54.
- WHA13.69 (1960) Reports of the Executive Board on its twenty-fourth and twenty-fifth sessions.
- WHA14.1 (1961) Increase in the membership of the Executive Board.
- WHA14.2 (1961) Development of the malaria eradication programme.
- WHA14.3 (1961) Status of collection of annual contributions and of advances to the working capital fund. Cites: WHA8.13.
- WHA14.4 (1961) Amendments to the staff rules.
- WHA14.5 (1961) Travel expenses and allowances for members of the Executive Board.
- WHA14.6 (1961) Assessment for 1960 and 1961 of new members.
- WHA14.7 (1961) Assessment for 1961 of new members.
- WHA14.8 (1961) Scale of assessment for 1962.
- WHA14.9 (1961) Headquarters accommodation: progress report.
- WHA14.10 (1961) Headquarters accommodation: status of the building fund.
- WHA14.11 (1961) Headquarters accommodation: reimbursement by the United Nations.
- WHA14.12 (1961) Use of Russian as a working language in the Regional Organization for Europe.
- WHA14.13 (1961) Supplementary budget estimates for 1961. Cites: WHA13.38.
- WHA14.14 (1961) Malaria eradication programme: administrative and operational costs.
- WHA14.15 (1961) Financing of the malaria eradication programme. Cites: WHA13.45. Cited by: WHA14.43, WHA14.44, WHA15.34, WHA15.35, WHA16.17, WHA17.26.
- WHA14.16 (1961) Election of members entitled to designate a person to serve on the Executive Board.
- WHA14.17 (1961) Effective working budget and budget level for 1962.
- WHA14.18 (1961) Admission of new associate members: Ruanda-Urundi.
- WHA14.19 (1961) Admission of new associate members: Tanganyika.
- WHA14.20 (1961) Admission of new members: Islamic Republic of Mauritania.
- WHA14.21 (1961) Amendments to the financial rules.
- WHA14.22 (1961) Provision of emergency supplies to member states. Cites: WHA13.41.
- WHA14.23 (1961) Voluntary fund for health promotion: report on contributions received.
- WHA14.24 (1961) Adoption of a WHO flag.
- WHA14.25 (1961) Accommodation for the Regional Office for South-East Asia.
- WHA14.26 (1961) Report on assistance to the Republic of the Congo (Leopoldville).
- WHA14.27 (1961) Malaria eradication special account.
- WHA14.28 (1961) Decisions of the United Nations, specialized agencies and IAEA affecting WHO's activities on administrative and financial questions.
- WHA14.29 (1961) Prior consultation with the United Nations and its agencies on matters of mutual concern.
- WHA14.30 (1961) Annual report of the United Nations Joint Staff Pension Board for 1959.
- WHA14.31 (1961) Appointment of representatives to the WHO Staff Pension Committee.
- WHA14.32 (1961) Currency of payment of contributions.
- WHA14.33 (1961) Place of meeting of the fifteenth World Health Assembly.
- WHA14.34 (1961) Annual report of the Director-General for 1960: administrative and financial aspects.
- WHA14.35 (1961) Universality of WHO membership.
- WHA14.36 (1961) Annual report of the Director-General for 1960: programme aspects.
- WHA14.37 (1961) Continued assistance to newly independent states. Cited by: WHA28.75.
- WHA14.38 (1961) Malaria eradication programme.
- WHA14.39 (1961) Priorities in programme.
- WHA14.40 (1961) Smallpox eradication programme.
- WHA14.41 (1961) Committee on International Quarantine: eighth report.
- WHA14.42 (1961) Activities jointly assisted by UNICEF and WHO.

Wernli, Falcone et al. BMJ Global Health, version 21.03.2023

- WHA14.43 (1961) Appropriation resolution for the financial year 1962. Cites: WHA14.15. Cited by: WHA15.10, WHA15.12, WHA15.46.
- WHA14.44 (1961) Interpretation of criteria to determine eligibility for credits towards the payment of contributions for financing malaria programmes. Cites: WHA14.15.
- WHA14.45 (1961) Rights and obligations of associate members having attained independence.
- WHA14.46 (1961) Amendments to the rules of procedure of the World Health Assembly.
- WHA14.47 (1961) Relations with the League of Arab States.
- WHA14.48 (1961) Assessment for 1961 and 1962 of the Islamic Republic of Mauritania.
- WHA14.49 (1961) Appropriation resolution for the financial year: Islamic Republic of Mauritania, Ruanda-Urundi and Tanganyika.
- WHA14.50 (1961) Agreement with the International Office of Epizootics.
- WHA14.51 (1961) Possibilities of reducing the length of World Health Assemblies. Cites: WHA13.1, WHA13.40.
- WHA14.52 (1961) Development of education in Africa: co-operation with UNESCO.
- WHA14.53 (1961) Decisions of the United Nations, specialized agencies and IAEA affecting WHO's activities on program matters.
- WHA14.54 (1961) International encouragement of scientific research into the control of cancerous diseases. Cites: WHA13.68.
- WHA14.55 (1961) Programme appraisals.
- WHA14.56 (1961) Radiation health, including protection of mankind from ionizing radiation hazards, whatsoever their source. Cites: WHA13.56.
- WHA14.57 (1961) Reports of the Executive Board on its twenty-sixth and twenty-seventh sessions.
- WHA14.58 (1961) Declaration concerning the granting of independence in colonial countries and peoples and the tasks of the World Health Organization. Cited by: WHA22.51, WHA28.75.
- WHA14.59 (1961) Resolution of thanks.
- WHA15.1 (1962) Terms of reference of the main committees.
- WHA15.2 (1962) Award of the Léon Barnard Foundation medal and prize.
- WHA15.3 (1962) United Nations prizes for the international encouragement of scientific research into the control of cancerous diseases.
- WHA15.4 (1962) Contract of the Director-General: salary and allowances.
- WHA15.5 (1962) Salaries of the Deputy-General, Assistant Directors-General and Regional Directors.
- WHA15.6 (1962) Election of members entitled to designate a person to serve on the Executive Board.
- WHA15.7 (1962) Financial report on the accounts of WHO for the year 1960 and report of the external auditor.
- WHA15.8 (1962) Financial report on the accounts of WHO for the year 1961 and report of the external auditor.
- WHA15.9 (1962) Status of collection of annual contributions and of advances to the working capital fund. Cites: WHA8.13.
- WHA15.10 (1962) Supplementary budget estimates for 1962. Cites: WHA14.43.
- WHA15.11 (1962) Assessment of new members for 1961 and 1962.
- WHA15.12 (1962) Addition to schedule A to the appropriation resolution for the financial year 1962. Cites: WHA14.43.
- WHA15.13 (1962) Scale of assessment for 1963. Cites: WHA8.5. Cited by: WHA17.11.
- WHA15.14 (1962) Accommodation for the Regional Office for Africa. Cites: WHA13.41. Cited by: WHA16.9.
- WHA15.15 (1962) Housing of staff of the Regional Office for Africa. Cited by: WHA23.14.
- WHA15.16 (1962) Admission of new members: Western Samoa.
- WHA15.17 (1962) Annual report of the Director-General for 1961: programme aspects.
- WHA15.18 (1962) Report on assistance to the Republic of the Congo (Leopoldville).
- WHA15.19 (1962) Report on development of the malaria eradication programme.

Wernli, Falcone et al. BMJ Global Health, version 21.03.2023

- WHA15.20 (1962) Development of the malaria eradication programme: acceleration of the programme from continued voluntary contributions. Cited by: WHA15.34.
- WHA15.21 (1962) Health problems of seafarers. Cites: WHA13.51. Cited by: WHA19.48.
- WHA15.22 (1962) Continued assistance to newly independent states. Cites: WHA13.24. Cited by: WHA16.31, WHA28.75.
- WHA15.23 (1962) Effective working budget and budget level for 1963.
- WHA15.24 (1962) Application for admission to membership: Sultanate of Muscat and Oman.
- WHA15.25 (1962) Admission of new associate members: Jamaica.
- WHA15.26 (1962) Admission of new associate members: Uganda.
- WHA15.27 (1962) Communication from the government of Argentina concerning the holding of a World Health Assembly in Argentina.
- WHA15.28 (1962) Selection of the country in which the sixteenth World Health Assembly will be held.
- WHA15.29 (1962) Headquarters accommodation: progress report.
- WHA15.30 (1962) Advances from the working capital fund for provision of emergency supplies to member states. Cites: WHA13.41.
- WHA15.31 (1962) Amendments to staff rules.
- WHA15.32 (1962) Annual report of the United Nations Joint Staff Pension Board for 1960.
- WHA15.33 (1962) Appointment of representatives to the WHO Staff Pension Committee.
- WHA15.34 (1962) Malaria eradication special account. Cites: WHA8.30, WHA14.15, WHA15.20. Cited by: WHA17.25.
- WHA15.35 (1962) Criteria for determining eligibility of credits towards the payment of contributions for financing malaria programmes. Cites: WHA14.15.
- WHA15.36 (1962) Periodicity of meetings of the Committee on International Quarantine. Cited by: WHA15.37.
- WHA15.37 (1962) Committee on International Quarantine: ninth report. Cites: WHA15.36.
- WHA15.38 (1962) Committee on International Quarantine: tenth report. Cites: WHA11.44.
- WHA15.39 (1962) Priorities in programme.
- WHA15.40 (1962) Organizational study on co-ordination with the United Nations and the specialized agencies. Cited by: WHA20.49, WHA21.45, WHA22.52.
- WHA15.41 (1962) Clinical and pharmacological evaluation of drugs. Cited by: WHA18.42, WHA19.35, WHA23.13, WHA23.48.
- WHA15.42 (1962) Appropriation resolution for the financial year 1963. Cited by: WHA15.46, WHA16.6.
- WHA15.43 (1962) Second report on the world health situation. Cites: WHA11.38. Cited by: WHA17.35, WHA19.52.
- WHA15.44 (1962) Communication from the International Fertility Association.
- WHA15.45 (1962) Assessment for 1962 and 1963 of Western Samoa.
- WHA15.46 (1962) Appropriation resolutions for the financial years 1962 and 1963: Jamaica and Uganda. Cites: WHA14.43, WHA15.42.
- WHA15.47 (1962) Malaria eradication postage stamps.
- WHA15.48 (1962) Assignment of Mongolian People's Republic to a region.
- WHA15.49 (1962) Decisions of the United Nations, specialized agencies and IAEA affecting WHO's activities: administrative and financial matters.
- WHA15.50 (1962) Amendments to the rules of procedure of the World Health Assembly.
- WHA15.51 (1962) Role of the physician in the preservation and promotion of peace. Cited by: WHA20.54, WHA32.24, WHA34.38, WHA39.19.
- WHA15.52 (1962) Medical research programme for 1958-1961. Cited by: WHA25.60.
- WHA15.53 (1962) Smallpox eradication programme.
- WHA15.54 (1962) Developments in activities assisted jointly with UNICEF.
- WHA15.55 (1962) Decisions of the United Nations, specialized agencies and IAEA affecting WHO's activities: programme matters.

Wernli, Falcone et al. BMJ Global Health, version 21.03.2023

- WHA15.56 (1962) World Food Programme.
- WHA15.57 (1962) United Nations Development Decade. Cited by: WHA16.40.
- WHA15.58 (1962) Organizational study: methods of planning and execution of projects. Cited by: WHA15.59.
- WHA15.59 (1962) Future organizational studies by the Executive Board. Cites: WHA15.58.
- WHA15.60 (1962) Reports of the Executive Board on its twenty-eighth and twenty-ninth sessions.
- WHA16.1 (1963) Appointment of the Director-General.
- WHA16.2 (1963) Contract of the Director-General.
- WHA16.3 (1963) Admission of new associate members: Mauritius.
- WHA16.4 (1963) Admission of new associate members: Kenya.
- WHA16.5 (1963) Financial report on the accounts of WHO for the year 1962 and report of the external auditor.
- WHA16.6 (1963) Supplementary budget estimates for 1963. Cites: WHA15.42.
- WHA16.7 (1963) Assessments of new members for 1962 and 1963.
- WHA16.8 (1963) Addition to schedule A to the appropriation resolutions for the financial years 1962 and 1963.
- WHA16.9 (1963) Accommodation for the Regional Office for Africa. Cites: WHA13.41, WHA15.14.
- WHA16.10 (1963) Scale of assessment for 1964. Cites: WHA8.5. Cited by: WHA17.11.
- WHA16.11 (1963) Election of members entitled to designate a person to serve on the Executive Board.
- WHA16.12 (1963) Annual report of the Director-General for 1962.
- WHA16.13 (1963) Effective working budget and budget level for 1964.
- WHA16.14 (1963) Appointment of the external auditor.
- WHA16.15 (1963) Amendments to the staff rules.
- WHA16.16 (1963) Selection of the country in which the seventeenth World Health Assembly will be held.
- WHA16.17 (1963) Malaria eradication special account. Cites: WHA14.15. Cited by: WHA17.25.
- WHA16.18 (1963) Malaria eradication postage stamps.
- WHA16.19 (1963) Annual report of the United Nations Joint Staff Pension Board for 1961.
- WHA16.20 (1963) Status of collection of annual contributions and advances to the working capital fund. Cites: WHA8.13. Cited by: WHA17.33, WHA18.21, WHA19.29, WHA20.31, WHA21.6, WHA22.14, WHA41.7.
- WHA16.21 (1963) Appointment of representatives to the WHO Staff Pension Committee.
- WHA16.22 (1963) Headquarters accommodation: progress report. Cites: WHA13.46. Cited by: WHA18.28, WHA20.11.
- WHA16.23 (1963) Report on the development of the malaria eradication programme. Cited by: WHA18.3.
- WHA16.24 (1963) Developments in activities assisted jointly with UNICEF.
- WHA16.25 (1963) Television influence on youth.
- WHA16.26 (1963) Voluntary fund for health promotion: medical research.
- WHA16.27 (1963) Voluntary fund for health promotion: community water supply.
- WHA16.28 (1963) Appropriation resolution for the financial year 1964. Cited by: WHA17.9, WHA17.11.
- WHA16.29 (1963) Organizational study on measures for providing effective assistance in medical education and training to meet priority needs of the newly independent and emerging countries.
- WHA16.30 (1963) Organizational study on methods of planning and execution of projects.
- WHA16.31 (1963) Continued assistance to newly independent states. Cites: WHA15.22.
- WHA16.32 (1963) Decisions of the United Nations, specialized agencies and IAEA affecting WHO's activities: administrative, budgetary and financial matters: inter-organization machinery for matters of pay and allowances.

Wernli, Falcone et al. BMJ Global Health, version 21.03.2023

- WHA16.33 (1963) Decisions of the United Nations, specialized agencies and IAEA affecting WHO's activities: conference arrangements.
- WHA16.34 (1963) Additional regulations of 23 May 1963 amending the International Sanitary Regulations, in particular with respect to notifications.
- WHA16.35 (1963) Committee on International Quarantine: eleventh report.
- WHA16.36 (1963) Clinical and pharmacological evaluation of drugs. Cited by: WHA17.39, WHA18.42, WHA19.35, WHA23.13, WHA23.48, WHA24.56, WHA26.31.
- WHA16.37 (1963) Smallpox eradication programme.
- WHA16.38 (1963) Clinical and pharmacological evaluation of drugs: standards of drugs.
- WHA16.39 (1963) Decisions of the United Nations, specialized agencies and IAEA affecting WHO's activities: programme matters.
- WHA16.40 (1963) United Nations Development Decade. Cites: WHA15.57.
- WHA16.41 (1963) Extension of agreement with UNRWA. Cites: WHA13.62. Cited by: WHA18.24.
- WHA16.42 (1963) Joint FAO/WHO programme on food standards (Codex Alimentarius).
- WHA16.43 (1963) Meetings of the Regional Committee for Africa. Cited by: WHA17.50, WHA24.51.
- WHA16.44 (1963) Reports of the Executive Board on its thirtieth and thirty-first sessions.
- WHA17.1 (1964) Suspension of rules 5(c) and 93(c) of the rules of procedure of the Health Assembly for the duration of the seventeenth World Health Assembly.
- WHA17.2 (1964) Report on an absentee member of the Executive Board.
- WHA17.3 (1964) Award of the Léon Bernard Foundation medal and prize.
- WHA17.4 (1964) Admission of Northern Rhodesia as an associate member.
- WHA17.5 (1964) Admission of Nyasaland as an associate member.
- WHA17.6 (1964) Admission of Malta as an associate member.
- WHA17.7 (1964) Admission of Qatar as an associate member.
- WHA17.8 (1964) Status of collection of annual contributions and of advances to the working capital fund.
- WHA17.9 (1964) Supplementary budget estimates for 1964. Cites: WHA16.28.
- WHA17.10 (1964) Contributions of Algeria, Burundi and Rwanda for 1962. Cited by: WHA19.10, WHA20.13, WHA21.9, WHA22.6.
- WHA17.11 (1964) Adjustment in the scales of assessment for 1963 and 1964 (Czechoslovakia and Hungary). Cites: WHA15.13, WHA16.10, WHA16.28.
- WHA17.12 (1964) Assessments of new members for 1964.
- WHA17.13 (1964) Addition to schedule A to the appropriation resolution for the financial year 1964.
- WHA17.14 (1964) Scale of assessment for 1965.
- WHA17.15 (1964) Effective working budget and budget level for 1965.
- WHA17.16 (1964) Election of members entitled to designate a person to serve on the Executive Board.
- WHA17.17 (1964) Annual report of the Director-General for 1963.
- WHA17.18 (1964) Appropriation resolution for the financial year 1965. Cited by: WHA18.11, WHA18.15.
- WHA17.19 (1964) Programme and budget estimates for 1965: voluntary fund for health promotion.
- WHA17.20 (1964) Large-scale development programmes. Cited by: WHA18.45, WHA23.61, WHA25.17, WHA35.17.
- WHA17.21 (1964) Presentation of future programmes and budget estimates.
- WHA17.22 (1964) Report on the development of the malaria eradication programme. Cites: WHA10.32, WHA13.55.
- WHA17.23 (1964) Advances from the capital working fund for provision of emergency supplies to member states. Cites: WHA13.41.
- WHA17.24 (1964) Malaria eradication special account.
- WHA17.25 (1964) Placement of the malaria eradication special account in the voluntary fund for health promotion. Cites: WHA8.30, WHA13.24, WHA15.34, WHA16.17.



Wernli, Falcone et al. BMJ Global Health, version 21.03.2023

- WHA17.26 (1964) Legislation to govern malaria eradication operations under the regular budget. Cites: WHA8.30, WHA14.15.
- WHA17.27 (1964) Headquarters accommodation.
- WHA17.28 (1964) Selection of the country in which the eighteenth World Health Assembly will be held.
- WHA17.29 (1964) Amendments to the staff rules.
- WHA17.30 (1964) Annual report of the United Nations Joint Staff Pension Board for 1962.
- WHA17.31 (1964) Appointment of representatives to the WHO Staff Pension Committee.
- WHA17.32 (1964) Decisions of the United Nations, specialized agencies and the International Atomic Energy Agency affecting WHO's activities: administrative, budgetary and financial matters.
- WHA17.33 (1964) Members in arrears in the payment of their contributions to an extent which may invoke article 7 of the Constitution. Cites: WHA16.20. Cited by: WHA18.21.
- WHA17.34 (1964) Accommodation for the Regional Office for Africa.
- WHA17.35 (1964) Supplement to the second report on the world health situation. Cites: WHA15.43.
- WHA17.36 (1964) The medical research programme of WHO, 1958-1963. Cited by: WHA25.60.
- WHA17.37 (1964) Medical research programme: proposal for the establishment of a world health research centre.
- WHA17.38 (1964) General programme of work covering a specific period.
- WHA17.39 (1964) Clinical and pharmacological evaluation of drugs. Cites: WHA16.36. Cited by: WHA18.42, WHA19.35, WHA22.41, WHA23.13, WHA23.48, WHA24.56.
- WHA17.40 (1964) Community water supply programme. Cited by: WHA19.50.
- WHA17.41 (1964) Standards of drugs. Cited by: WHA18.36.
- WHA17.42 (1964) Committee on International Quarantine: twelfth report.
- WHA17.43 (1964) Smallpox eradication programme.
- WHA17.44 (1964) Joint FAO/WHO programme on food standards (Codex Alimentarius).
- WHA17.45 (1964) Decisions of the United Nations, specialized agencies and the International Atomic Energy Agency affecting WHO's activities. Cited by: WHA24.50, WHA34.38, WHA39.19.
- WHA17.46 (1964) Decisions of the United Nations, specialized agencies and the International Atomic Energy Agency affecting WHO's activities: programme matters.
- WHA17.47 (1964) Co-ordination with the International Atomic Energy Agency. Cites: WHA11.50, WHA13.56. Cited by: WHA19.39.
- WHA17.48 (1964) Future organizational study by the Executive Board.
- WHA17.49 (1964) Participation of WHO in a world research agency for cancer. Cited by: WHA18.44.
- WHA17.50 (1964) Meetings of the Regional Committee for Africa. Cites: WHA16.43. Cited by: WHA18.40, WHA24.51, WHA47.1.
- WHA17.51 (1964) Reports of the Executive Board on its thirty-second and thirty-third sessions.
- WHA18.1 (1965) Provisional amendments to the rules of procedure of the World Health Assembly.
- WHA18.2 (1965) Award of a prize for research work on mental subnormality.
- WHA18.3 (1965) Development of the malaria eradication programme. Cites: WHA16.23.
- WHA18.4 (1965) Committee on International Quarantine: thirteenth report.
- WHA18.5 (1965) Additional regulations of 12 May 1965 amending the International Sanitary Regulations, in particular with respect to disinsecting of ships and aircraft, and appendices 3 and 4 (forms of International Certificates of Vaccination or Revaccination against yellow fever and against smallpox).
- WHA18.6 (1965) Joint FAO/WHO food standards programme (Codex Alimentarius).
- WHA18.7 (1965) International standards and units for biological standardization. Cites: WHA3.8. Cited by: WHA26.32, WHA37.27.
- WHA18.8 (1965) Financial report on the accounts of WHO for the year 1963 and report of the external auditor.
- WHA18.9 (1965) Financial report on the accounts of WHO for the year 1964 and report of the external auditor.

Wernli, Falcone et al. BMJ Global Health, version 21.03.2023

- WHA18.10 (1965) Status of collection of annual contributions and of advances to the working capital fund.
- WHA18.11 (1965) Supplementary budget estimates for 1965. Cites: WHA17.18.
- WHA18.12 (1965) Accommodation for the Regional Office for Africa.
- WHA18.13 (1965) Amendments to the financial regulations.
- WHA18.14 (1965) Scale of assessment for and amount of the working capital fund. Cited by: WHA19.17, WHA20.24, WHA21.25, WHA21.26, WHA22.12, WHA22.15, WHA23.19.
- WHA18.15 (1965) Adjustment in the scales of assessment for 1964 and 1965: United Republic of Tanzania. Cites: WHA17.18.
- WHA18.16 (1965) Assessment of new members for 1965.
- WHA18.17 (1965) Scale of assessment for 1966.
- WHA18.18 (1965) Election of members entitled to designate a person to serve on the Executive Board.
- WHA18.19 (1965) Effective working budget and budget level for 1966.
- WHA18.20 (1965) Annual report of the Director-General for 1964.
- WHA18.21 (1965) Members in arrears in the payment of their contributions to an extent which may invoke article 7 of the Constitution. Cites: WHA8.13, WHA16.20, WHA17.33. Cited by: WHA19.29, WHA20.31, WHA21.6, WHA22.14.
- WHA18.22 (1965) Amendments to the rules of procedure of the World Health Assembly.
- WHA18.23 (1965) WHO participation in the Expanded Programme of Technical Assistance.
- WHA18.24 (1965) Extension of the agreement with the United Nations Relief and Works Agency for Palestine Refugees in the Near East. Cites: WHA16.41. Cited by: WHA19.25.
- WHA18.25 (1965) Selection of the country in which the nineteenth World Health Assembly will be held.
- WHA18.26 (1965) Annual report of the United Nations Joint Staff Pension Board for 1963.
- WHA18.27 (1965) Appointment of representatives to the WHO Staff Pension Committee.
- WHA18.28 (1965) Headquarters accommodation: financing. Cites: WHA16.22. Cited by: WHA20.11.
- WHA18.29 (1965) Inaugural ceremony for the new headquarters building.
- WHA18.30 (1965) Headquarters accommodation: voluntary contributions from governments.
- WHA18.31 (1965) Voluntary fund for health promotion: world health foundations. Cited by: WHA20.37, WHA26.24.
- WHA18.32 (1965) Decisions of the United Nations, specialized agencies and the International Atomic Energy Agency affecting WHO's activities: administrative, budgetary and financial matters.
- WHA18.33 (1965) Fourth general programme of work covering a specific period: 1967-1971. Cited by: WHA21.49.
- WHA18.34 (1965) Programme and budget estimates for 1966: voluntary fund for health promotion.
- WHA18.35 (1965) Appropriation resolution for the financial year 1966. Cited by: WHA19.8.
- WHA18.36 (1965) Quality control of pharmaceutical preparations. Cites: WHA17.41. Cited by: WHA19.47, WHA20.34.
- WHA18.37 (1965) Organizational study of the Executive Board: methods of planning and execution of projects.
- WHA18.38 (1965) Smallpox eradication programme.
- WHA18.39 (1965) Proposal for the establishment of a revolving fund for teaching and laboratory equipment for medical education and training.
- WHA18.40 (1965) Report on operative paragraph 2 of resolutions WHA17.50. Cites: WHA17.50. Cited by: WHA24.51.
- WHA18.41 (1965) Reports of the Executive Board on its thirty-fourth and thirty-fifth sessions.
- WHA18.42 (1965) Adverse drug reaction monitoring system. Cites: WHA15.41, WHA16.36, WHA17.39. Cited by: WHA19.35, WHA20.51, WHA23.13.
- WHA18.43 (1965) Proposal for the establishment of a world health research centre. Cited by: WHA19.34, WHA19.38.

Wernli, Falcone et al. BMJ Global Health, version 21.03.2023

- WHA18.44 (1965) Establishment of an International Agency for Research on Cancer. Cites: WHA17.49. Cited by: WHA19.49.
- WHA18.45 (1965) Decisions of the United Nations, specialized agencies and the International Atomic Energy Agency affecting WHO's activities: administrative, programme matters. Cites: WHA17.20. Cited by: WHA35.17.
- WHA18.46 (1965) Single Convention on Narcotic Drugs, 1961. Cites: WHA7.6. Cited by: WHA19.46, WHA30.18.
- WHA18.47 (1965) Control measures for certain dependency-producing drugs. Cited by: WHA23.42.
- WHA18.48 (1965) Amendments to article 7 of the Constitution. Cited by: WHA22.26, WHA24.51.
- WHA18.49 (1965) Programme activities in the health aspects of world population which might be developed by WHO. Cited by: WHA19.43, WHA20.41, WHA21.43, WHA22.32, WHA31.37.
- WHA19.1 (1966) Inauguration of the Headquarters building.
- WHA19.2 (1966) Award of the Léon Bernard Foundation medal and prize.
- WHA19.3 (1966) Salaries of staff in ungraded posts.
- WHA19.4 (1966) Salary of the Director-General.
- WHA19.5 (1966) Financial report on the accounts of WHO for the year 1965, report of the external auditor, and comments thereon of the Executive Board.
- WHA19.6 (1966) Status of collection of annual contributions and of advances to the working capital fund.
- WHA19.7 (1966) Establishment of a revolving fund for teaching and laboratory equipment for medical education and training. Cited by: WHA24.16, WHA26.25.
- WHA19.8 (1966) Supplementary budget estimates for 1966. Cites: WHA18.35.
- WHA19.9 (1966) Place of meeting of the twenty-second World Health Assembly. Cited by: WHA20.39.
- WHA19.10 (1966) Assessment of new members: 1965 and 1966. Cites: WHA17.10.
- WHA19.11 (1966) Scale of assessment for 1967.
- WHA19.12 (1966) Travel standards.
- WHA19.13 (1966) Malaria eradication programme. Cited by: WHA20.14.
- WHA19.14 (1966) Election of members entitled to designate a person to serve on the Executive Board.
- WHA19.15 (1966) Effective working budget and budget level for 1967.
- WHA19.16 (1966) Smallpox eradication programme. Cited by: WHA19.40, WHA28.52.
- WHA19.17 (1966) Advances from the working capital fund for provision of emergency supplies to member states. Cites: WHA18.14.
- WHA19.18 (1966) Expression of appreciation to retiring external auditor.
- WHA19.19 (1966) Appointment of the external auditor.
- WHA19.20 (1966) Establishment and operation of world health foundations. Cited by: WHA20.37, WHA26.24.
- WHA19.21 (1966) Establishment of a Dr A.T. Shousha Foundation.
- WHA19.22 (1966) Annual report of the Director-General for 1965.
- WHA19.23 (1966) Reports of the Executive Board on its thirty-sixth and thirty-seventh sessions.
- WHA19.24 (1966) International Agency for Research on Cancer: report concerning host agreement between the government of France and WHO.
- WHA19.25 (1966) Extension of the agreement with the United Nations Relief and Works Agency for Palestine Refugees in the Near East. Cites: WHA18.24. Cited by: WHA22.25.
- WHA19.26 (1966) Annual report of the United Nations Joint Staff Pension Board for 1964.
- WHA19.27 (1966) Appointment of representatives to the WHO Staff Pension Committee.
- WHA19.28 (1966) Selection of the country in which the twentieth World Health Assembly will be held.
- WHA19.29 (1966) Members in arrears in the payment of their contributions to an extent which may invoke article 7 of the Constitution. Cites: WHA8.13, WHA16.20, WHA18.21. Cited by: WHA20.31, WHA21.6, WHA22.14.

Wernli, Falcone et al. BMJ Global Health, version 21.03.2023

- WHA19.30 (1966) Decisions of the United Nations, the specialized agencies and the International Atomic Energy Agency affecting WHO's activities: administrative, budgetary and financial matters. Cited by: WHA21.32, WHA23.31.
- WHA19.31 (1966) Resolution AFR/RC15/R2 adopted by the Regional Committee for Africa at its fifteenth session on 9 September 1965. Cites: WHA2.103. Cited by: WHA20.38, WHA21.34, WHA24.51.
- WHA19.32 (1966) Headquarters accommodation: report on financing.
- WHA19.33 (1966) Headquarters accommodation: voluntary contributions from governments.
- WHA19.34 (1966) Extension of WHO activities in research. Cites: WHA18.43.
- WHA19.35 (1966) International monitoring of adverse reactions to drugs. Cites: WHA15.41, WHA16.36, WHA17.39, WHA18.42. Cited by: WHA20.51, WHA23.13.
- WHA19.36 (1966) Prevention of traffic accidents. Cited by: WHA27.59.
- WHA19.37 (1966) Rehabilitation. Cited by: WHA29.68, WHA38.18.
- WHA19.38 (1966) Research in cardiovascular diseases. Cites: WHA18.43. Cited by: WHA25.44, WHA29.49.
- WHA19.39 (1966) Effects of atomic radiation. Cites: WHA13.56, WHA17.47. Cited by: WHA25.57, WHA26.57.
- WHA19.40 (1966) Programme and budget estimates for 1967: voluntary fund for health promotion. Cites: WHA19.16.
- WHA19.41 (1966) Appropriation resolution for the financial year 1967. Cited by: WHA20.10, WHA20.12.
- WHA19.42 (1966) Form of presentation of the programme and budget estimates.
- WHA19.43 (1966) Programme activities in the health aspects of world population which might be developed by WHO. Cites: WHA18.49. Cited by: WHA20.41, WHA21.43, WHA22.32, WHA31.37.
- WHA19.44 (1966) Eighth revision of the International Classification of Diseases.
- WHA19.45 (1966) Revision of WHO nomenclature regulations. Cited by: WHA20.19.
- WHA19.46 (1966) Single Convention on Narcotic Drugs, 1961. Cites: WHA18.46.
- WHA19.47 (1966) Quality control of pharmaceutical preparations. Cites: WHA18.36. Cited by: WHA20.34.
- WHA19.48 (1966) Study of the nature and extent of health problems of seafarers and of the health services available to them. Cites: WHA15.21. Cited by: WHA20.44.
- WHA19.49 (1966) International Agency for Research on Cancer. Cites: WHA18.44.
- WHA19.50 (1966) Community water supply programme. Cites: WHA17.40. Cited by: WHA21.36, WHA23.36.
- WHA19.51 (1966) Reports of expert committees.
- WHA19.52 (1966) Third report on the world health situation. Cites: WHA15.43. Cited by: WHA21.46, WHA23.24.
- WHA19.53 (1966) Study of the criteria for assessing the equivalence of medical degrees in different countries. Cited by: WHA20.46.
- WHA19.54 (1966) Decisions of the United Nations, the specialized agencies and the International Atomic Energy Agency affecting WHO's activities: programme matters.
- WHA20.1 (1967) Amendments to the rules of procedure of the World Health Assembly.
- WHA20.2 (1967) Conduct of the general discussion at future Health Assemblies. Cited by: WHA25.33, WHA26.1, WHA50.18.
- WHA20.3 (1967) Procedure for discussing in the World Health Assembly matters relating to the programme and budget of the Organization. Cited by: WHA24.4, WHA25.33.
- WHA20.4 (1967) Award of the Léon Bernard Foundation medal and prize.
- WHA20.5 (1967) Annual report of the Director-General for 1966.
- WHA20.6 (1967) Financial report on the accounts of WHO for the year 1966, report of the financial auditor, and comments thereon of the Executive Board.

Wernli, Falcone et al. BMJ Global Health, version 21.03.2023

- WHA20.7 (1967) Status of collection of annual contributions and of advances to the working capital fund.
- WHA20.8 (1967) Contributions of South Africa.
- WHA20.9 (1967) Accommodation for the Regional Office for South-East Asia.
- WHA20.10 (1967) Adjustment in the scale of assessment for 1966: Malaysia. Cites: WHA19.41.
- WHA20.11 (1967) Headquarters accommodation: report on financing. Cites: WHA16.22, WHA18.28. Cited by: WHA23.18.
- WHA20.12 (1967) Supplementary budget estimates for 1967. Cites: WHA19.41.
- WHA20.13 (1967) Assessment of new members: 1966 and 1967. Cites: WHA17.10.
- WHA20.14 (1967) Malaria eradication programme. Cites: WHA19.13.
- WHA20.15 (1967) Smallpox eradication programme. Cited by: WHA21.21, WHA33.4.
- WHA20.16 (1967) Election of members entitled to designate a person to serve on the Executive Board.
- WHA20.17 (1967) Effective working budget and budget level for 1968.
- WHA20.18 (1967) WHO Nomenclature Regulations 1967. Cited by: WHA72.15.
- WHA20.19 (1967) Compendium of recommendations, definitions and standards relating to health statistics. Cites: WHA19.45. Cited by: WHA21.44.
- WHA20.20 (1967) Scale of assessment for 1968.
- WHA20.21 (1967) Extension of the use of the Russian and Spanish languages.
- WHA20.22 (1967) Decisions of the United Nations, the specialized agencies and IAEA affecting WHO's activities: administrative, budgetary and financial matters. Cited by: WHA21.32, WHA23.31, WHA24.53, WHA25.34, WHA26.50, WHA30.28.
- WHA20.23 (1967) Future requirements for office accommodation at Headquarters.
- WHA20.24 (1967) Advances from the working capital fund for provision of emergency supplies to member states. Cites: WHA18.14.
- WHA20.25 (1967) Agreement between the government of France and WHO concerning the legal status, privileges and immunities of the International Agency for Research on Cancer.
- WHA20.26 (1967) Travel standards.
- WHA20.27 (1967) Joint FAO/WHO food standards programme: amendments to the statutes of the Codex Alimentarius Commission.
- WHA20.28 (1967) Annual report of the United Nations Joint Staff Pension Board for 1965.
- WHA20.29 (1967) Appointment of representatives to the WHO Staff Pension Committee.
- WHA20.30 (1967) Further amendments to the rules of procedure of the World Health Assembly.
- WHA20.31 (1967) Members in arrears in the payment of their contributions to an extent which may invoke article 7 of the Constitution. Cites: WHA8.13, WHA16.20, WHA18.21, WHA19.29. Cited by: WHA21.6, WHA22.14.
- WHA20.32 (1967) Programme and budget estimates for 1968: voluntary fund for health promotion.
- WHA20.33 (1967) Appropriation resolution for the financial year 1968.
- WHA20.34 (1967) Quality control of pharmaceutical preparations. Cites: WHA18.36, WHA19.47. Cited by: WHA21.37, WHA24.56, WHA47.11.
- WHA20.35 (1967) Pharmaceutical advertising.
- WHA20.36 (1967) Amendments to articles 24 and 25 of the Constitution. Cited by: WHA22.26, WHA26.62.
- WHA20.37 (1967) Voluntary fund for health promotion: progress report on world health foundations. Cites: WHA18.31, WHA19.20.
- WHA20.38 (1967) Implementation of resolution WHA19.31. Cites: WHA19.31. Cited by: WHA21.34, WHA24.51.
- WHA20.39 (1967) Selection of the country in which the twenty-first World Health Assembly will be held. Cites: WHA5.48, WHA19.9.
- WHA20.40 (1967) Twentieth anniversary of the World Health Organization.

Wernli, Falcone et al. BMJ Global Health, version 21.03.2023

- WHA20.41 (1967) Health aspects of population dynamics. Cites: WHA18.49, WHA19.43. Cited by: WHA21.43, WHA22.32, WHA31.37.
- WHA20.42 (1967) Control measures for LSD and related substances. Cited by: WHA23.42.
- WHA20.43 (1967) Control measures for certain dependence-producing drugs. Cited by: WHA21.42, WHA23.42.
- WHA20.44 (1967) Health problems of seafarers and health services available to them. Cites: WHA19.48.
- WHA20.45 (1967) International Agency for Research on Cancer.
- WHA20.46 (1967) Study of the criteria for assessing the equivalence of medical degrees in different countries. Cites: WHA19.53.
- WHA20.47 (1967) Epidemiological situation in Viet-Nam. Cited by: WHA21.48.
- WHA20.48 (1967) Organizational study on co-ordination at the national level in relation to the technical co-operation field programme of the Organization. Cited by: WHA23.61.
- WHA20.49 (1967) Review of the organizational study on co-ordination with the United Nations and the specialized agencies. Cites: WHA15.40. Cited by: WHA21.45, WHA22.52.
- WHA20.50 (1967) Policy governing assistance to the developing countries. Cited by: WHA21.47, WHA28.75.
- WHA20.51 (1967) WHO pilot research project for international monitoring of adverse reaction to drugs. Cites: WHA18.42, WHA19.35. Cited by: WHA23.13.
- WHA20.52 (1967) Decisions of the United Nations, the specialized agencies and IAEA affecting WHO's activities: programme matters. Cited by: WHA22.55, WHA23.43, WHA24.49.
- WHA20.53 (1967) Health and economic development. Cited by: WHA22.55, WHA23.43, WHA23.61, WHA24.49, WHA25.17, WHA28.88.
- WHA20.54 (1967) Resolution 2162 (XXI) of the General Assembly of the United Nations: question of general and complete disarmament. Cites: WHA11.31, WHA15.51. Cited by: WHA22.58, WHA23.53, WHA32.24, WHA34.38, WHA39.19.
- WHA20.55 (1967) Reports of the Executive Board on its thirty-eighth and thirty-ninth sessions.
- WHA20.56 (1967) General order of magnitude of the budget for 1969.
- WHA21.1 (1968) Twentieth anniversary of the World Health Organization.
- WHA21.2 (1968) Admission of Bahrain as an associate member.
- WHA21.3 (1968) Award of the Léon Bernard Foundation Medal and Prize.
- WHA21.4 (1968) Financial report on the accounts of WHO for the year 1967, report of the external auditor, and comments thereon of the Executive Board.
- WHA21.5 (1968) Status of collection of annual contributions and of advances to the Working Capital Fund.
- WHA21.6 (1968) Members in arrears in the payment of their contributions to an extent which may invoke Article 7 of the Constitution. Cites: WHA8.13, WHA16.20, WHA18.21, WHA19.29, WHA20.31. Cited by: WHA22.14.
- WHA21.7 (1968) Budgetary implications for 1968 and 1969 of recent decisions on general service salaries in Geneva.
- WHA21.8 (1968) Per diem rate for members of the Executive Board.
- WHA21.9 (1968) Assessments for 1967 and 1968 of new members and associate members. Cites: WHA13.16, WHA17.10.
- WHA21.10 (1968) Tax equalization plan.
- WHA21.11 (1968) Scale of assessment for 1969.
- WHA21.12 (1968) Award of the Dr A. T. Shousha Foundation Medal and Prize.
- WHA21.13 (1968) Effective working budget and budget level for 1969.
- WHA21.14 (1968) Election of members entitled to designate a person to serve on the Executive Board.
- WHA21.15 (1968) Appointment of the Director-General.
- WHA21.16 (1968) Contract of the Director-General.



Wernli, Falcone et al. BMJ Global Health, version 21.03.2023

- WHA21.17 (1968) Annual report of the Director-General for 1967.
- WHA21.18 (1968) Appropriation resolution for the financial year 1969. Cited by: WHA22.12.
- WHA21.19 (1968) Programme and budget estimates for 1969: voluntary fund for health promotion.
- WHA21.20 (1968) Training of national health personnel. Cited by: WHA23.35, WHA24.59, WHA26.59.
- WHA21.21 (1968) Smallpox eradication programme. Cites: WHA20.15.
- WHA21.22 (1968) Malaria eradication programme. Cited by: WHA22.39.
- WHA21.23 (1968) Health problems of seafarers and health services available to them.
- WHA21.24 (1968) Recognition of secretariat services.
- WHA21.25 (1968) Advances from the working capital fund to meet unforeseen or extraordinary expenses. Cites: WHA18.14.
- WHA21.26 (1968) Advances from the working capital fund for the provision of emergency supplies to member states. Cites: WHA18.14.
- WHA21.27 (1968) Headquarters accommodation: future requirements.
- WHA21.28 (1968) Working principles governing the admission of non-governmental organizations into official relations with WHO: amendment to paragraph 2 (vi). Cited by: WHA40.25.
- WHA21.29 (1968) Confirmation of the selection of the country in which the twenty-second World Health Assembly will be held.
- WHA21.30 (1968) Annual report of the United Nations Joint Staff Pension Board for 1966.
- WHA21.31 (1968) Appointment of representatives to the WHO Staff Pension Committee.
- WHA21.32 (1968) Recommendations of the ad hoc committee of experts to examine the finances of the United Nations and the specialized agencies: progress report on implementation. Cites: WHA19.30, WHA20.22. Cited by: WHA21.49, WHA23.31.
- WHA21.33 (1968) Co-ordination with the United Nations, the specialized agencies and the International Atomic Energy Agency: administrative, budgetary and financial matters. Cited by: WHA21.49, WHA23.31.
- WHA21.34 (1968) Implementation of resolution WHA19.31. Cites: WHA19.31, WHA20.38. Cited by: WHA24.51, WHA28.49.
- WHA21.35 (1968) Study of the criteria for assessing the equivalence of medical degrees in different countries. Cited by: WHA22.42, WHA25.42.
- WHA21.36 (1968) Community Water Supply Programme. Cites: WHA19.50. Cited by: WHA23.36, WHA25.35.
- WHA21.37 (1968) Quality control of drugs. Cites: WHA20.34. Cited by: WHA22.50, WHA24.56.
- WHA21.38 (1968) Health assistance to refugees and displaced persons. Cited by: WHA22.43, WHA23.52, WHA24.33, WHA25.54.
- WHA21.39 (1968) General order of magnitude of the budget for 1970.
- WHA21.40 (1968) Form of presentation of programme and budget estimates. Cited by: WHA22.38.
- WHA21.41 (1968) Pharmaceutical advertising. Cited by: WHA41.17.
- WHA21.42 (1968) Control measures for certain dependence-producing drugs. Cites: WHA20.43. Cited by: WHA23.42.
- WHA21.43 (1968) Health aspects of population dynamics. Cites: WHA18.49, WHA19.43, WHA20.41. Cited by: WHA22.32, WHA31.37.
- WHA21.44 (1968) Recommendations, definitions and standards relating to health statistics: rules for selection of cause of death for primary mortality tabulation. Cites: WHA20.19.
- WHA21.45 (1968) Review of the organizational study on co-ordination with the United Nations and the specialized agencies. Cites: WHA15.40, WHA20.49. Cited by: WHA22.52.
- WHA21.46 (1968) Supplement to the third report on the World Health Situation. Cites: WHA19.52.
- WHA21.47 (1968) Policy governing assistance to developing countries. Cites: WHA20.50. Cited by: WHA22.51, WHA24.59, WHA28.75.
- WHA21.48 (1968) Epidemiological situation in Viet-Nam. Cites: WHA20.47.
- WHA21.49 (1968) Long-term planning in the field of health. Cites: WHA18.33, WHA21.32, WHA21.33. Cited by: WHA23.59, WHA23.61, WHA25.17.

Wernli, Falcone et al. BMJ Global Health, version 21.03.2023

- WHA21.50 (1968) Co-ordination with the United Nations, the specialized agencies and the International Atomic Energy Agency: programme matters.
- WHA21.51 (1968) Disinsection of aircraft. Cited by: WHA23.58.
- WHA21.52 (1968) Committee on International Quarantine: fourteenth report.
- WHA21.53 (1968) Special Review of the International Sanitary Regulations.
- WHA21.54 (1968) Reports of the Executive Board on its fortieth and forty-first sessions.
- WHA22.1 (1969) Salaries and allowances: ungraded posts.
- WHA22.2 (1969) Status of collection of annual contributions and of advances to the Working Capital Fund.
- WHA22.3 (1969) Election of members entitled to designate a person to serve on the Executive Board.
- WHA22.4 (1969) Financial report on the accounts of WHO for the year 1968 and report of the external auditor. Cited by: WHA23.5.
- WHA22.5 (1969) Per diem rate for members of the Executive Board. Cited by: WHA30.10.
- WHA22.6 (1969) Assessments of new members; assessment of Mauritius and of Southern Yemen. Cites: WHA8.5, WHA17.10. Cited by: WHA24.13, WHA24.34, WHA25.8, WHA25.9, WHA25.51, WHA25.52, WHA25.53, WHA26.19, WHA26.20, WHA26.53, WHA27.7, WHA27.38, WHA27.39, WHA28.11, WHA28.12, WHA28.13, WHA28.14, WHA28.15, WHA29.6, WHA29.7, WHA29.8, WHA29.9, WHA29.10, WHA29.11, WHA31.14, WHA33.13, WHA37.10, WHA37.11, WHA44.19, WHA44.20, WHA44.21, WHA45.12, WHA46.13, WHA46.14, WHA47.23, WHA47.24, WHA48.19.
- WHA22.7 (1969) Scale of assessment for 1970.
- WHA22.8 (1969) Financing of the promotion of sales of WHO publications. Cites: WHA1.92, WHA12.6. Cited by: WHA55.9.
- WHA22.9 (1969) Amendment to the contract of the Director-General.
- WHA22.10 (1969) Annual report of the Director-General for 1968.
- WHA22.11 (1969) Use of the Russian and Spanish languages. Cited by: WHA22.44.
- WHA22.12 (1969) Supplementary budget estimates for 1969. Cites: WHA18.14, WHA21.18.
- WHA22.13 (1969) Effective working budget and budget level for 1970.
- WHA22.14 (1969) Members in arrears in the payment of their contributions to an extent which may invoke Article 7 of the Constitution. Cites: WHA8.13, WHA16.20, WHA18.21, WHA19.29, WHA20.31, WHA21.6.
- WHA22.15 (1969) Advances from the working capital fund for the provision of emergency supplies to member states. Cites: WHA18.14.
- WHA22.16 (1969) Agreement between the World Health Organization and the Organization of African Unity. Cited by: WHA24.51.
- WHA22.17 (1969) Appointment of external auditor.
- WHA22.18 (1969) Headquarters accommodation: future requirements.
- WHA22.19 (1969) Inclusion of Afghanistan in the Eastern Mediterranean Region.
- WHA22.20 (1969) Co-ordination with the United Nations, the specialized agencies and the International Atomic Energy Agency on administrative, budgetary and financial matters.
- WHA22.21 (1969) Annual report of the United Nations Joint Staff Pension Board for 1967.
- WHA22.22 (1969) Appointment of representatives to the WHO Staff Pension Committee.
- WHA22.23 (1969) Selection of the country in which the twenty-third World Health Assembly will be held.
- WHA22.24 (1969) Resolution of thanks.
- WHA22.25 (1969) Extension of the agreement with the United Nations Relief and Works Agency for Palestine refugees in the Near East. Cites: WHA19.25.
- WHA22.26 (1969) Situation regarding the possibilities for the acceptance of amendments to the Constitution of WHO. Cites: WHA18.48, WHA20.36.
- WHA22.27 (1969) Financial participation by governments in the costs of implementation of WHO-assisted projects. Cites: WHA4.60, WHA7.36. Cited by: WHA24.46.

Wernli, Falcone et al. BMJ Global Health, version 21.03.2023

- WHA22.28 (1969) Implementation of resolution WHA7.33. Cites: WHA6.47, WHA7.33. Cited by: WHA23.30.
- WHA22.29 (1969) Prevention of blindness. Cited by: WHA25.55, WHA28.54, WHA37.18, WHA45.33, WHA51.11, WHA56.26.
- WHA22.30 (1969) Fluoridation and dental health. Cited by: WHA31.50, WHA42.39, WHA60.17.
- WHA22.31 (1969) Study of the nature and extent of health problems of seafarers and the health services available to them.
- WHA22.32 (1969) Health aspects of population dynamics. Cites: WHA18.49, WHA19.43, WHA20.41, WHA21.43. Cited by: WHA31.37.
- WHA22.33 (1969) Appropriation resolution for the financial year 1970.
- WHA22.34 (1969) Smallpox eradication programme.
- WHA22.35 (1969) Socio-economic consequences of the zoonoses.
- WHA22.36 (1969) Proposed programme and budget estimates for 1970: voluntary fund for health promotion.
- WHA22.37 (1969) Special account for servicing costs.
- WHA22.38 (1969) Form of presentation of the programme and budget estimates. Cites: WHA21.40.
- WHA22.39 (1969) Re-examination of the global strategy of malaria eradication. Cites: WHA21.22. Cited by: WHA23.12, WHA31.45.
- WHA22.40 (1969) Research on methods of vector control.
- WHA22.41 (1969) Safety and efficacy of drugs. Cites: WHA17.39.
- WHA22.42 (1969) Study of the criteria for assessing the equivalence of medical degrees in different countries. Cites: WHA21.35. Cited by: WHA22.51, WHA24.59, WHA25.42.
- WHA22.43 (1969) Health assistance to refugees and displaced persons in the Middle East. Cites: WHA21.38. Cited by: WHA23.52, WHA24.33, WHA25.54.
- WHA22.44 (1969) General order of magnitude of the budget for 1971. Cites: WHA22.11.
- WHA22.45 (1969) Award of the Dr A. T. Shousha Foundation Medal and Prize.
- WHA22.46 (1969) International Health Regulations.
- WHA22.47 (1969) Diseases under surveillance: louse-borne typhus, louse-borne relapsing fever, viral influenza, paralytic poliomyelitis. Cited by: WHA34.13, WHA56.19, WHA58.5.
- WHA22.48 (1969) Diseases under surveillance: malaria.
- WHA22.49 (1969) Committee on International Quarantine: fifteenth report.
- WHA22.50 (1969) Quality control of drugs. Cites: WHA21.37. Cited by: WHA23.45, WHA24.56, WHA28.65, WHA47.11.
- WHA22.51 (1969) Training of medical personnel and the “brain drain”. Cites: WHA14.58, WHA21.47, WHA22.42. Cited by: WHA24.59, WHA25.42, WHA57.19.
- WHA22.52 (1969) Review of the organizational study on co-ordination with the United Nations and the specialized agencies. Cites: WHA15.40, WHA20.49, WHA21.45.
- WHA22.53 (1969) Long-term planning in the field of health, biennial programming, and improvement of the evaluation process. Cited by: WHA23.59.
- WHA22.54 (1969) Establishment of pharmaceutical production in developing countries. Cited by: WHA44.34, WHA56.31, WHA62.13, WHA67.18.
- WHA22.55 (1969) Second United Nations development decade. Cites: WHA20.52, WHA20.53. Cited by: WHA23.43, WHA24.49, WHA24.59.
- WHA22.56 (1969) Increase in the production and use of edible protein.
- WHA22.57 (1969) United Nations conference on the human environment. Cited by: WHA23.60.
- WHA22.58 (1969) Question of general and complete disarmament: chemical and bacteriological (biological) weapons and the consequences of their possible use. Cites: WHA20.54. Cited by: WHA23.53, WHA32.24, WHA34.38.
- WHA22.59 (1969) Co-ordination with the United Nations, the specialized agencies and the International Atomic Energy Agency on programme matters.
- WHA22.60 (1969) Reports of the Executive Board on its forty-second and forty-third sessions.

Wernli, Falcone et al. BMJ Global Health, version 21.03.2023

- WHA23.1 (1970) Method of work of the Health Assembly. Cited by: WHA24.3, WHA24.4, WHA25.33.
- WHA23.2 (1970) Amendments to the rules of procedure of the World Health Assembly to facilitate the work of the Assembly. Cited by: WHA24.3.
- WHA23.3 (1970) Election of members entitled to designate a person to serve on the Executive Board.
- WHA23.4 (1970) Award of the Léon Bernard Foundation Medal and Prize.
- WHA23.5 (1970) Financial report on the accounts of WHO for the year 1969 and report of the external auditor. Cites: WHA22.4.
- WHA23.6 (1970) Status of collection of annual contributions and of advances to the Working Capital Fund.
- WHA23.7 (1970) Headquarters accommodation: future requirements.
- WHA23.8 (1970) Review of the Working Capital Fund. Cited by: WHA24.17, WHA24.18.
- WHA23.9 (1970) Annual report of the Director-General for 1969.
- WHA23.10 (1970) Award of the Dr A. T. Shousha Foundation Medal and Prize.
- WHA23.11 (1970) Admission of new members and associate member.
- WHA23.12 (1970) Measures taken in pursuance of the revised global strategy of malaria eradication. Cites: WHA22.39.
- WHA23.13 (1970) International monitoring of adverse reactions to drugs. Cites: WHA15.41, WHA16.36, WHA17.39, WHA18.42, WHA19.35, WHA20.51. Cited by: WHA24.56.
- WHA23.14 (1970) Real estate fund. Cites: WHA15.15. Cited by: WHA23.16, WHA23.17, WHA24.22, WHA24.24, WHA24.25, WHA25.39, WHA25.40.
- WHA23.15 (1970) Appropriation to the real estate fund.
- WHA23.16 (1970) Additional housing for the staff of the Regional Office for Africa, and extension of the Regional Office Building. Cites: WHA23.14.
- WHA23.17 (1970) Acquisition of additional land at headquarters. Cites: WHA23.14.
- WHA23.18 (1970) Headquarters accommodation: report on financing. Cites: WHA20.11.
- WHA23.19 (1970) Advances from the working capital fund for the provision of emergency supplies to member states. Cites: WHA18.14.
- WHA23.20 (1970) Scale of assessment for 1971.
- WHA23.21 (1970) Annual report of the United Nations Joint Staff Pension Board for 1968.
- WHA23.22 (1970) Appointment of representatives to the WHO Staff Pension Committee.
- WHA23.23 (1970) Amendments to the statute of the International Agency for Research on Cancer.
- WHA23.24 (1970) Fourth report on the world health situation. Cites: WHA19.52. Cited by: WHA25.56, WHA27.60.
- WHA23.25 (1970) Review of the organizational study on co-ordination with the United Nations and the specialized agencies.
- WHA23.26 (1970) Future organizational study by the Executive Board. Cited by: WHA24.37.
- WHA23.27 (1970) Co-ordination with the United Nations, the specialized agencies and the International Atomic Energy Agency on administrative, budgetary and financial matters.
- WHA23.28 (1970) Selection of the country in which the twenty-fourth World Health Assembly will be held.
- WHA23.29 (1970) Acceptance of amendments to the Constitution of WHO.
- WHA23.30 (1970) Implementation of resolution WHA7.33. Cites: WHA7.33, WHA22.28.
- WHA23.31 (1970) Second report of the ad hoc committee of experts to examine the finances of the United Nations and the specialized agencies: progress report on implementation. Cites: WHA19.30, WHA20.22, WHA21.32, WHA21.33.
- WHA23.32 (1970) Health consequences of smoking. Cited by: WHA29.55, WHA31.56, WHA33.35.
- WHA23.33 (1970) Research on methods of vector control.
- WHA23.34 (1970) Present problems of yellow fever in Africa. Cited by: WHA32.34.
- WHA23.35 (1970) Training of national health personnel. Cites: WHA21.20. Cited by: WHA24.59, WHA26.59.
- WHA23.36 (1970) Community Water Supply. Cites: WHA19.50, WHA21.36.

Wernli, Falcone et al. BMJ Global Health, version 21.03.2023

- WHA23.37 (1970) Effective working budget and budget level for 1971.
- WHA23.38 (1970) Consideration of the desirability and feasibility of the establishment of a group of representatives of member States to consult with the external auditor on his examination of the financial and administrative procedures of WHO.
- WHA23.39 (1970) Members in arrears in the payment of their contributions to an extent which may invoke Article 7 of the Constitution.
- WHA23.40 (1970) Co-ordination with the United Nations, the specialized agencies and the International Atomic Energy Agency on programme matters.
- WHA23.41 (1970) Human rights.
- WHA23.42 (1970) Drug dependence. Cites: WHA18.47, WHA20.42, WHA20.43, WHA21.42. Cited by: WHA24.56, WHA24.57, WHA25.62, WHA26.52, WHA28.80.
- WHA23.43 (1970) Second United Nations development decade. Cites: WHA20.52, WHA20.53, WHA22.55. Cited by: WHA24.49.
- WHA23.44 (1970) Study of the capacity of the United Nations development system. Cited by: WHA24.52.
- WHA23.45 (1970) Quality control of drugs. Cites: WHA22.50. Cited by: WHA28.65.
- WHA23.46 (1970) Smallpox eradication programme.
- WHA23.47 (1970) Occupational health: miners. Cited by: WHA24.27.
- WHA23.48 (1970) Drug efficacy. Cites: WHA15.41, WHA16.36, WHA17.39. Cited by: WHA24.56, WHA26.31.
- WHA23.49 (1970) Research on the organization of community health services. Cited by: WHA25.17, WHA26.35.
- WHA23.50 (1970) Health hazards of food additives.
- WHA23.51 (1970) Appropriation resolution for the financial year 1971. Cited by: WHA24.10.
- WHA23.52 (1970) Health assistance to refugees and displaced persons in the Middle East. Cites: WHA21.38, WHA22.43. Cited by: WHA24.32, WHA24.33, WHA25.54.
- WHA23.53 (1970) The rapid prohibition of chemical and bacteriological (biological) weapons. Cites: WHA20.54, WHA22.58. Cited by: WHA32.24, WHA34.38, WHA39.19.
- WHA23.54 (1970) Reports of the Executive Board on its forty-fourth and forty-fifth sessions.
- WHA23.55 (1970) Programme and budget estimates for 1971: voluntary fund for health promotion.
- WHA23.56 (1970) Special account for servicing costs.
- WHA23.57 (1970) Reservations to the International Health Regulations.
- WHA23.58 (1970) Disinsection of aircraft. Cites: WHA21.51. Cited by: WHA24.36.
- WHA23.59 (1970) General programme of work covering a specific period. Cites: WHA21.49, WHA22.53. Cited by: WHA27.60, WHA28.70, WHA28.75, WHA29.22, WHA34.24, WHA36.35.
- WHA23.60 (1970) Human environment. Cites: WHA22.57. Cited by: WHA24.47, WHA25.58.
- WHA23.61 (1970) Basic principles for the development of national health services. Cites: WHA17.20, WHA20.48, WHA20.53, WHA21.49. Cited by: WHA25.17, WHA26.35, WHA27.44, WHA28.40, WHA28.75, WHA28.88, WHA29.74, WHA31.12, WHA34.14.
- WHA23.62 (1970) General order of magnitude of the budget for 1972.
- WHA24.1 (1971) Award of the Léon Bernard Foundation Medal and Prize.
- WHA24.2 (1971) Award of the Dr A. T. Shousha Foundation Medal and Prize.
- WHA24.3 (1971) Method of work of the Health Assembly. Cites: WHA23.1, WHA23.2. Cited by: WHA24.4, WHA25.33.
- WHA24.4 (1971) Method of work of the Health Assembly. Cites: WHA20.3, WHA23.1, WHA24.3. Cited by: WHA25.33.
- WHA24.5 (1971) Financial report on the accounts of WHO for the year 1970 and report of the external auditor. Cited by: WHA25.2.
- WHA24.6 (1971) Annual report of the Director-General for 1970.
- WHA24.7 (1971) Election of members entitled to designate a person to serve on the Executive Board.

Wernli, Falcone et al. BMJ Global Health, version 21.03.2023

- WHA24.8 (1971) Status of collection of annual contributions and of advances to the Working Capital Fund.
- WHA24.9 (1971) Members in arrears in the payment of their contributions to an extent which may invoke Article 7 of the Constitution. Cites: WHA8.13.
- WHA24.10 (1971) Supplementary budget estimates for 1971. Cites: WHA23.51.
- WHA24.11 (1971) Use of the Executive Board special fund. Cites: WHA7.24.
- WHA24.12 (1971) Review of method of establishment of scale of assessment. Cites: WHA8.5. Cited by: WHA25.8, WHA25.10, WHA26.18, WHA26.19, WHA26.21, WHA27.11, WHA29.15, WHA30.5, WHA30.6, WHA31.15, WHA32.6, WHA32.7, WHA33.9, WHA33.10, WHA33.11, WHA33.14, WHA34.6, WHA35.6, WHA35.7, WHA35.8, WHA36.7, WHA36.8, WHA37.8, WHA37.9, WHA38.5, WHA38.6, WHA39.9, WHA43.22, WHA44.18, WHA45.11, WHA45.13, WHA45.14, WHA45.15, WHA46.12, WHA47.21, WHA47.22, WHA50.9, WHA54.9.
- WHA24.13 (1971) Assessment of the Gambia for 1971. Cites: WHA8.5, WHA22.6.
- WHA24.14 (1971) Assessment of Southern Rhodesia.
- WHA24.15 (1971) Scale of assessment for 1972.
- WHA24.16 (1971) Revolving fund for teaching and laboratory equipment for medical education and training. Cites: WHA19.7.
- WHA24.17 (1971) Review of the Working Capital Fund. Cites: WHA23.8.
- WHA24.18 (1971) Advances from the working capital fund for the provision of emergency supplies to member states. Cites: WHA23.8.
- WHA24.19 (1971) Salaries and allowances for ungraded posts.
- WHA24.20 (1971) Application for membership by the German Democratic Republic.
- WHA24.21 (1971) Admission of new members: Sultanate of Oman.
- WHA24.22 (1971) Future requirements for headquarters accommodation. Cites: WHA23.14.
- WHA24.23 (1971) Appropriation to the real estate fund.
- WHA24.24 (1971) Additional housing for the staff of the Regional Office for Africa. Cites: WHA23.14.
- WHA24.25 (1971) Extension of the Regional Office building for South-East Asia. Cites: WHA23.14.
- WHA24.26 (1971) Cholera pandemic. Cited by: WHA44.6.
- WHA24.27 (1971) Occupational health: miners. Cites: WHA23.47.
- WHA24.28 (1971) Effective working budget and budget level for 1972.
- WHA24.29 (1971) Amendment to the contract of the Director-General.
- WHA24.30 (1971) Occupational health programmes.
- WHA24.31 (1971) Development of the medical use of ionizing radiation. Cited by: WHA25.57.
- WHA24.32 (1971) Health assistance to refugees and displaced persons in the Middle East. Cites: WHA23.52. Cited by: WHA25.54.
- WHA24.33 (1971) Health assistance to refugees and displaced persons in the Middle East. Cites: WHA21.38, WHA22.43, WHA23.52. Cited by: WHA25.54, WHA28.35, WHA29.69.
- WHA24.34 (1971) Assessment of the Sultanate of Oman for 1971. Cites: WHA22.6. Cited by: WHA25.8.
- WHA24.35 (1971) Committee on International Surveillance of Communicable Diseases: sixteenth report.
- WHA24.36 (1971) Disinsection of aircraft. Cites: WHA23.58.
- WHA24.37 (1971) Organizational study on medical literature services to members. Cites: WHA23.26.
- WHA24.38 (1971) Future organizational study by the Executive Board.
- WHA24.39 (1971) Annual Report of the United Nations Joint Staff Pension Board for 1969.
- WHA24.40 (1971) Appointment of representatives to the WHO Staff Pension Committee.
- WHA24.41 (1971) Selection of the country in which the twenty-fifth World Health Assembly will be held.
- WHA24.42 (1971) Appropriation resolution for the financial year 1972. Cited by: WHA25.5.
- WHA24.43 (1971) Programme and budget estimates for 1972: voluntary fund for health promotion.
- WHA24.44 (1971) Programme and budget estimates for 1972: special account for servicing costs.



Wernli, Falcone et al. BMJ Global Health, version 21.03.2023

- WHA24.45 (1971) Smallpox eradication.
- WHA24.46 (1971) Financial participation by governments in the costs of implementation of WHO-assisted projects. Cites: WHA22.27.
- WHA24.47 (1971) Problems of the human environment. Cites: WHA23.60. Cited by: WHA25.58, WHA26.58, WHA26.59, WHA27.49.
- WHA24.48 (1971) Health consequences of smoking. Cited by: WHA29.55, WHA31.56, WHA33.35.
- WHA24.49 (1971) Strategy for health during the second United Nations development decade. Cites: WHA20.52, WHA20.53, WHA22.55, WHA23.43. Cited by: WHA25.31.
- WHA24.50 (1971) Co-ordination with the United Nations, the specialized agencies and the International Atomic Energy Agency: health promotion in relation to disarmament. Cites: WHA17.45.
- WHA24.51 (1971) Co-ordination with the United Nations, the specialized agencies and the International Atomic Energy Agency: declaration on the granting of independence to colonial countries and peoples. Cites: WHA16.43, WHA17.50, WHA18.40, WHA18.48, WHA19.31, WHA20.38, WHA21.34, WHA22.16. Cited by: WHA26.49.
- WHA24.52 (1971) Study of the capacity of the United Nations development system. Cites: WHA23.44. Cited by: WHA25.31, WHA27.33.
- WHA24.53 (1971) Co-ordination with the United Nations, the specialized agencies and the International Atomic Energy Agency: continuation of the Joint Inspection Unit. Cites: WHA20.22. Cited by: WHA25.34, WHA26.50, WHA30.28.
- WHA24.54 (1971) Co-ordination with the United Nations, the specialized agencies and the International Atomic Energy Agency on administrative, budgetary and financial matters.
- WHA24.55 (1971) Community water supply.
- WHA24.56 (1971) Quality, safety and efficacy of drugs. Cites: WHA16.36, WHA17.39, WHA20.34, WHA21.37, WHA22.50, WHA23.13, WHA23.42, WHA23.48. Cited by: WHA25.61, WHA26.30, WHA37.33.
- WHA24.57 (1971) Drug dependence. Cites: WHA23.42. Cited by: WHA25.62, WHA26.52, WHA28.80.
- WHA24.58 (1971) General programme of work covering a specific period: 1973-1977.
- WHA24.59 (1971) Training of national health personnel. Cites: WHA21.20, WHA21.47, WHA22.42, WHA22.51, WHA22.55, WHA23.35. Cited by: WHA25.42, WHA29.72.
- WHA24.60 (1971) Reports of the Executive Board on its forty-sixth and forty-seventh sessions.
- WHA25.1 (1972) Representation of China in the World Health Organization. Cited by: WHA26.11.
- WHA25.2 (1972) Financial report on the accounts of WHO for the year 1971 and report of the external auditor. Cites: WHA24.5.
- WHA25.3 (1972) Merger of the technical assistance and special fund components of the United Nations development programme (budgetary consequences).
- WHA25.4 (1972) Status of collection of annual contributions and of advances to the Working Capital Fund.
- WHA25.5 (1972) Supplementary budget estimates for 1972: requirements resulting from international monetary developments and merger of the technical assistance and special fund components of the United Nations development programme. Cites: WHA24.42.
- WHA25.6 (1972) Members in arrears in the payment of their contributions to an extent which may invoke Article 7 of the Constitution: Dominican Republic. Cited by: WHA33.7.
- WHA25.7 (1972) Members in arrears in the payment of their contributions to an extent which may invoke Article 7 of the Constitution.
- WHA25.8 (1972) Assessment for 1971 and 1972 of Bahrain, Fiji, and Oman. Cites: WHA22.6, WHA24.12, WHA24.34.
- WHA25.9 (1972) Assessment for 1972 and 1973 of the United Arab Emirates. Cites: WHA22.6. Cited by: WHA26.18.
- WHA25.10 (1972) Scale of assessment for 1973. Cites: WHA8.5, WHA24.12.
- WHA25.11 (1972) Annual report of the Director-General for 1971.

Wernli, Falcone et al. BMJ Global Health, version 21.03.2023

- WHA25.12 (1972) Election of members entitled to designate a person to serve on the Executive Board.
- WHA25.13 (1972) Review of the Working Capital Fund.
- WHA25.14 (1972) Amendments to the financial regulations: standardization of the financial regulations governing external audit.
- WHA25.15 (1972) Amendments to the financial regulations: profits and losses on exchange.
- WHA25.16 (1972) Appointment of the external auditor.
- WHA25.17 (1972) Research in the organization of community health services. Cites: WHA17.20, WHA20.53, WHA21.49, WHA23.49, WHA23.61. Cited by: WHA26.35, WHA27.44, WHA28.88, WHA29.74.
- WHA25.18 (1972) Effective working budget and budget level for 1973.
- WHA25.19 (1972) Application for membership by the German Democratic Republic.
- WHA25.20 (1972) Admission of a new member: Bangladesh.
- WHA25.21 (1972) Admission of a new Associate Member: Papua New Guinea.
- WHA25.22 (1972) Assignment of Bangladesh to the South-East Asia Region.
- WHA25.23 (1972) Form of presentation of the programme and budget estimates. Cited by: WHA30.23.
- WHA25.24 (1972) Feasibility of introducing a biennial programme and budget. Cited by: WHA26.37.
- WHA25.25 (1972) Amendments to the statute of the International Agency for Research on Cancer.
- WHA25.26 (1972) Organizational study by the Executive Board on medical literature services to members.
- WHA25.27 (1972) Annual report of the United Nations Joint Staff Pension Board for 1970.
- WHA25.28 (1972) Appointment of representatives to the WHO Staff Pension Committee.
- WHA25.29 (1972) Award of the Dr A. T. Shousha Foundation Medal and Prize.
- WHA25.30 (1972) Provisional assignment of Papua New Guinea to the Western Pacific Region.
- WHA25.31 (1972) Coordination with the United Nations system: general matters. Cites: WHA24.49, WHA24.52. Cited by: WHA26.49.
- WHA25.32 (1972) Coordination with the United Nations system: implementation of the declaration on the granting of independence to colonial countries and peoples. Cited by: WHA26.49.
- WHA25.33 (1972) Method of work of the World Health Assembly. Cites: WHA20.2, WHA20.3, WHA23.1, WHA24.3, WHA24.4.
- WHA25.34 (1972) Continuation of the Joint Inspection Unit. Cites: WHA20.22, WHA24.53. Cited by: WHA26.50.
- WHA25.35 (1972) Community water supply. Cites: WHA21.36.
- WHA25.36 (1972) Twenty-fifth anniversary of the World Health Organization.
- WHA25.37 (1972) Future requirements for headquarters accommodation.
- WHA25.38 (1972) Appropriation to the real estate fund.
- WHA25.39 (1972) New zone office building in Brasilia. Cites: WHA23.14.
- WHA25.40 (1972) Extension of the Regional Office building for the Eastern Mediterranean Region. Cites: WHA23.14.
- WHA25.41 (1972) Award of the Léon Bernard Foundation Medal and Prize.
- WHA25.42 (1972) Training of national health personnel. Cites: WHA21.35, WHA22.42, WHA22.51, WHA24.59. Cited by: WHA29.72, WHA57.19.
- WHA25.43 (1972) Water quality in international water resources.
- WHA25.44 (1972) Cardiovascular diseases. Cites: WHA19.38. Cited by: WHA29.49.
- WHA25.45 (1972) Smallpox eradication.
- WHA25.46 (1972) Appropriation resolution for the financial year 1973. Cited by: WHA26.12, WHA26.16, WHA26.17.
- WHA25.47 (1972) Standardization of diagnostic materials. Cited by: WHA27.62.
- WHA25.48 (1972) Research in epidemiology and communications science.
- WHA25.49 (1972) Voluntary fund for health promotion.

Wernli, Falcone et al. BMJ Global Health, version 21.03.2023

- WHA25.50 (1972) Use of Arabic as an official language of the World Health Assembly.
- WHA25.51 (1972) Assessment for 1972 and 1973 of Qatar. Cites: WHA22.6. Cited by: WHA26.18.
- WHA25.52 (1972) Assessment of Bangladesh. Cites: WHA22.6.
- WHA25.53 (1972) Assessment of Papua New Guinea. Cites: WHA13.16, WHA22.6.
- WHA25.54 (1972) Health assistance to refugees and displaced persons in the Middle East. Cites: WHA21.38, WHA22.43, WHA23.52, WHA24.32, WHA24.33.
- WHA25.55 (1972) Prevention of blindness. Cites: WHA22.29. Cited by: WHA28.54, WHA37.18, WHA45.33, WHA51.11, WHA56.26.
- WHA25.56 (1972) Supplement to the fourth report on the World Health situation. Cites: WHA23.24.
- WHA25.57 (1972) Development of the medical use of ionizing radiation. Cites: WHA19.39, WHA24.31.
- WHA25.58 (1972) Problems of the human environment. Cites: WHA23.60, WHA24.47. Cited by: WHA26.58, WHA26.59.
- WHA25.59 (1972) Problems of the human environment: food hygiene. Cited by: WHA31.49.
- WHA25.60 (1972) WHO's role in the development and coordination of biomedical research. Cites: WHA7.52, WHA11.35, WHA12.17, WHA13.64, WHA15.52, WHA17.36. Cited by: WHA26.42, WHA26.61, WHA27.61, WHA28.70, WHA29.64, WHA31.35, WHA32.15, WHA33.25.
- WHA25.61 (1972) Quality, safety and efficacy of drugs. Cites: WHA24.56. Cited by: WHA26.30, WHA28.65.
- WHA25.62 (1972) Drug dependence. Cites: WHA23.42, WHA24.57. Cited by: WHA26.52, WHA28.80.
- WHA25.63 (1972) Occupational health programmes. Cited by: WHA28.73.
- WHA25.64 (1972) Reports of the Executive Board on its forty-eighth and forty-ninth sessions.
- WHA26.1 (1973) Method of work of the Health Assembly: terms of reference of the main committees. Cites: WHA20.2. Cited by: WHA28.69.
- WHA26.2 (1973) Admission of a new member: German Democratic Republic.
- WHA26.3 (1973) Twenty-fifth anniversary of the World Health Organization.
- WHA26.4 (1973) Contract of the Director-General.
- WHA26.5 (1973) Appointment of the Director-General.
- WHA26.6 (1973) Award of the Dr A. T. Shousha Foundation Medal and Prize.
- WHA26.7 (1973) Annual report of the Director-General for 1972.
- WHA26.8 (1973) Dr M. G. Candau, Director-General Emeritus.
- WHA26.9 (1973) Financial report on the accounts of WHO for the year 1972 and reports of the external auditor.
- WHA26.10 (1973) Status of collection of annual contributions and of advances to the Working Capital Fund.
- WHA26.11 (1973) Unpaid contributions of China included in the undistributed reserve. Cites: WHA25.1.
- WHA26.12 (1973) Revision of the text of the appropriation resolution for 1973. Cites: WHA25.46.
- WHA26.13 (1973) Award of the Léon Bernard Foundation Medal and Prize.
- WHA26.14 (1973) Election of members entitled to designate a person to serve on the Executive Board.
- WHA26.15 (1973) Members in arrears in the payment of their contributions to an extent which may invoke Article 7 of the Constitution.
- WHA26.16 (1973) Supplementary budget estimates for 1973. Cites: WHA25.46.
- WHA26.17 (1973) Assessment for 1972 and 1973 of Pakistan. Cites: WHA25.46.
- WHA26.18 (1973) Assessment for 1972 and 1973 of Qatar and the United Arab Emirates. Cites: WHA24.12, WHA25.9, WHA25.51.
- WHA26.19 (1973) Assessment for 1973 of Swaziland. Cites: WHA22.6, WHA24.12.
- WHA26.20 (1973) Assessment for 1973 and 1974 of the German Democratic Republic. Cites: WHA22.6.
- WHA26.21 (1973) Review of method of establishment of the scale of assessment. Cites: WHA8.5, WHA13.16, WHA24.12. Cited by: WHA27.7, WHA27.11, WHA28.11, WHA28.17, WHA29.15,

Wernli, Falcone et al. BMJ Global Health, version 21.03.2023

- WHA29.16, WHA30.5, WHA30.6, WHA31.15, WHA32.6, WHA32.7, WHA33.9, WHA33.10, WHA33.11, WHA33.14, WHA34.6, WHA35.6, WHA35.7, WHA35.8, WHA36.7, WHA36.8, WHA37.8, WHA37.9, WHA38.5, WHA38.6, WHA39.9, WHA43.22, WHA44.18, WHA45.11, WHA45.13, WHA45.14, WHA45.15, WHA46.12, WHA47.21, WHA47.22, WHA50.9.
- WHA26.22 (1973) Scale of assessment for 1974.
  - WHA26.23 (1973) Review of the Working Capital Fund.
  - WHA26.24 (1973) Reporting on the voluntary fund for health promotion. Cites: WHA13.24, WHA18.31, WHA19.20. Cited by: WHA29.31, WHA33.8.
  - WHA26.25 (1973) Revolving fund for teaching and laboratory equipment for medical education and training. Cites: WHA19.7.
  - WHA26.26 (1973) Amendments to the financial regulations.
  - WHA26.27 (1973) Appointment of external auditor.
  - WHA26.28 (1973) Admission of a new member: Democratic People's Republic of Korea.
  - WHA26.29 (1973) Smallpox eradication programme.
  - WHA26.30 (1973) International information system on drugs. Cites: WHA24.56, WHA25.61. Cited by: WHA45.28.
  - WHA26.31 (1973) Quality, safety and efficacy of drugs. Cites: WHA16.36, WHA23.48.
  - WHA26.32 (1973) International standards and units for biological substances. Cites: WHA3.8, WHA18.7. Cited by: WHA37.27.
  - WHA26.33 (1973) Effective working budget and budget level for 1974.
  - WHA26.34 (1973) Assignment of the Democratic People's Republic of Korea to the South-East Asia Region.
  - WHA26.35 (1973) Organizational study on methods of promoting the development of basic health services. Cites: WHA23.49, WHA23.61, WHA25.17. Cited by: WHA27.44, WHA28.88, WHA29.74, WHA34.14.
  - WHA26.36 (1973) Future organizational study by the Executive Board. Cited by: WHA27.18, WHA28.30.
  - WHA26.37 (1973) Amendments to articles 34 and 55 of the Constitution. Cites: WHA25.24. Cited by: WHA26.38, WHA28.74, WHA30.20.
  - WHA26.38 (1973) Feasibility of introducing a biennial programme and budget. Cites: WHA26.37. Cited by: WHA28.69, WHA30.20.
  - WHA26.39 (1973) Voluntary fund for health promotion.
  - WHA26.40 (1973) Programme and budget estimates. Cited by: WHA27.13.
  - WHA26.41 (1973) Appropriation resolution for the financial year 1974. Cited by: WHA27.4.
  - WHA26.42 (1973) WHO's role in the development and coordination of biomedical research. Cites: WHA25.60. Cited by: WHA26.43, WHA27.61, WHA28.70.
  - WHA26.43 (1973) Research in epidemiology and communications science. Cites: WHA26.42. Cited by: WHA27.44, WHA28.88, WHA29.74.
  - WHA26.44 (1973) Annual report of the United Nations Joint Staff Pension Board for 1971.
  - WHA26.45 (1973) Appointment of representatives to the WHO Staff Pension Committee.
  - WHA26.46 (1973) Future requirements for headquarters accommodation.
  - WHA26.47 (1973) Real estate fund.
  - WHA26.48 (1973) Real estate fund: staff housing in south Sudan.
  - WHA26.49 (1973) Coordination with the United Nations system: general matters. Cites: WHA24.51, WHA25.31, WHA25.32.
  - WHA26.50 (1973) Continuation of the Joint Inspection Unit. Cites: WHA20.22, WHA24.53, WHA25.34. Cited by: WHA30.28.
  - WHA26.51 (1973) International Civil Service Commission.
  - WHA26.52 (1973) Drug dependence. Cites: WHA23.42, WHA24.57, WHA25.62. Cited by: WHA28.80, WHA33.27.

Wernli, Falcone et al. BMJ Global Health, version 21.03.2023

- WHA26.53 (1973) Assessment for 1973 and 1974 of the Democratic People's Republic of Korea. Cites: WHA22.6.
- WHA26.54 (1973) Committee on International Surveillance of Communicable Diseases: seventeenth report. Cited by: WHA27.46.
- WHA26.55 (1973) Additional regulations of 23 May 1973 amending the International Health Regulations (1969), in particular with respect to articles 1, 21, 63 to 71, and 92. Cited by: WHA27.47.
- WHA26.56 (1973) Health assistance to refugees and displaced persons in the Middle East. Cited by: WHA27.42, WHA28.35, WHA29.69, WHA30.37, WHA31.38, WHA33.18, WHA34.19, WHA35.15.
- WHA26.57 (1973) Urgent need for suspension of testing of nuclear weapons. Cites: WHA19.39.
- WHA26.58 (1973) WHO's human health and environment programme. Cites: WHA24.47, WHA25.58. Cited by: WHA27.49, WHA29.45, WHA30.47.
- WHA26.59 (1973) Development of environmental manpower. Cites: WHA21.20, WHA23.35, WHA24.47, WHA25.58.
- WHA26.60 (1973) Drought in Africa. Cited by: WHA27.48.
- WHA26.61 (1973) Long-term planning of international cooperation in cancer research. Cites: WHA25.60. Cited by: WHA27.63, WHA28.85, WHA35.30.
- WHA26.62 (1973) Amendments to articles 24 and 25 of the Constitution. Cites: WHA20.36.
- WHA26.63 (1973) Reports of the Executive Board on its fiftieth and fifty-first sessions.
- WHA27.1 (1974) Award of the Dr A. T. Shousha Foundation Medal and Prize.
- WHA27.2 (1974) Financial report on the accounts of WHO for the year 1973 and reports of the external auditor.
- WHA27.3 (1974) Status of collection of annual contributions and of advances to the Working Capital Fund.
- WHA27.4 (1974) Supplementary budget estimates for 1974. Cites: WHA26.41.
- WHA27.5 (1974) Salaries and allowances for ungraded posts.
- WHA27.6 (1974) Salary of the Director-General.
- WHA27.7 (1974) Assessment for 1974 of the Bahamas. Cites: WHA22.6, WHA26.21.
- WHA27.8 (1974) Contributions payable by certain members in respect of 1974 and prior years.
- WHA27.9 (1974) Assessment of associate members. Cites: WHA1.80. Cited by: WHA28.17, WHA29.13, WHA29.16, WHA44.19, WHA45.12.
- WHA27.10 (1974) Members in arrears in the payment of their contributions to an extent which may invoke Article 7 of the Constitution.
- WHA27.11 (1974) Scale of assessment for 1975. Cites: WHA24.12, WHA26.21.
- WHA27.12 (1974) Election of members entitled to designate a person to serve on the Executive Board.
- WHA27.13 (1974) Study of the possibility of financing WHO activities in currencies other than US dollars and Swiss francs. Cites: WHA2.58, WHA26.40.
- WHA27.14 (1974) Headquarters accommodation: future requirements. Cited by: WHA28.24.
- WHA27.15 (1974) Real estate fund: additional accommodation for the Regional Office for Europe.
- WHA27.16 (1974) Real estate fund: installation of fire detection and control equipment in the building of the Regional Office for the Western Pacific.
- WHA27.17 (1974) Amendments to the rules of procedures of the World Health Assembly.
- WHA27.18 (1974) Organizational study on the interrelationships between the central technical services of WHO and programmes of direct assistance to Member States. Cites: WHA26.36. Cited by: WHA28.30.
- WHA27.19 (1974) Selection of a subject for the future organizational study to be made by the Executive Board. Cited by: WHA28.31.
- WHA27.20 (1974) Methods of work of the Executive Board.
- WHA27.21 (1974) Agreement between the World Health Organization and the African Development Bank.
- WHA27.22 (1974) Admission of a new member: Guinea-Bissau.

Wernli, Falcone et al. BMJ Global Health, version 21.03.2023

- WHA27.23 (1974) Admission of a new associate member: Namibia.
- WHA27.24 (1974) Effective working budget and budget level for 1975.
- WHA27.25 (1974) Annual report of the Director-General for 1973.
- WHA27.26 (1974) Award of the Léon Bernard Foundation Medal and Prize.
- WHA27.27 (1974) Health education. Cited by: WHA42.44.
- WHA27.28 (1974) Health education of children and young people. Cited by: WHA42.41, WHA42.44.
- WHA27.29 (1974) The role of WHO in bilateral or multilateral health aid programmes. Cited by: WHA34.37.
- WHA27.30 (1974) World Population Year and Conference, 1974.
- WHA27.31 (1974) Continuing education for physicians. Cited by: WHA29.72.
- WHA27.32 (1974) Coordination within the United Nations system on the development of information systems. Cited by: WHA30.46.
- WHA27.33 (1974) Coordination within the United Nations system on programme support costs. Cites: WHA12.31, WHA24.52. Cited by: WHA34.17.
- WHA27.34 (1974) Coordination with the United Nations system: the least developed among the developing countries.
- WHA27.35 (1974) Coordination within the United Nations system: general matters.
- WHA27.36 (1974) Activities of the World Health Organization with regard to assistance to liberation movements in southern Africa pursuant to United Nations General Assembly resolution 2918 (XXVII) and Economic and Social Council resolution 1804 (LV). Cited by: WHA28.35, WHA28.43.
- WHA27.37 (1974) Activities of the World Health Organization with regard to assistance to liberation movements in southern Africa pursuant to United Nations General Assembly resolution 2918 (XXVII) and Economic and Social Council resolution 1804 (LV). Cited by: WHA28.35, WHA28.43, WHA52.18, WHA56.28, WHA59.24.
- WHA27.38 (1974) Assessment for 1974 and future years of Guinea-Bissau. Cites: WHA22.6. Cited by: WHA29.15.
- WHA27.39 (1974) Assessment for 1974 of Namibia. Cites: WHA13.16, WHA22.6. Cited by: WHA29.13.
- WHA27.40 (1974) Annual report of the United Nations Joint Staff Pension Board for 1972.
- WHA27.41 (1974) Appointment of representatives to the WHO Staff Pension Committee.
- WHA27.42 (1974) Health assistance to refugees and displaced persons in the Middle East. Cites: WHA26.56. Cited by: WHA28.35.
- WHA27.43 (1974) Infant nutrition and breast-feeding. Cited by: WHA31.47, WHA32.42, WHA33.32, WHA34.23, WHA37.30, WHA39.28.
- WHA27.44 (1974) Promotion of national health services. Cites: WHA23.61, WHA25.17, WHA26.35, WHA26.43. Cited by: WHA28.88, WHA29.74.
- WHA27.45 (1974) Committee on International Surveillance of Communicable Diseases: eighteenth report. Cited by: WHA34.13.
- WHA27.46 (1974) Safety of food and water and the handling of wastes in international traffic. Cites: WHA26.54. Cited by: WHA31.49.
- WHA27.47 (1974) Reservations to the additional regulations of 23 May 1973 amending the International Health Regulations (1969). Cites: WHA26.55.
- WHA27.48 (1974) Drought. Cites: WHA26.60. Cited by: WHA28.48.
- WHA27.49 (1974) WHO's human health and environment programme. Cites: WHA24.47, WHA26.58. Cited by: WHA28.63, WHA29.45, WHA30.47.
- WHA27.50 (1974) WHO's human health and environment programme: coordination on programmes and action in the field of the environment. Cited by: WHA28.63, WHA29.45.
- WHA27.51 (1974) Development of the antimalaria programme. Cited by: WHA28.87, WHA32.16.
- WHA27.52 (1974) Intensification of research on tropical parasitic diseases. Cited by: WHA28.51, WHA28.71, WHA29.71.
- WHA27.53 (1974) Psychosocial factors and health. Cited by: WHA28.50.
- WHA27.54 (1974) Quality control of BCG vaccines.



Wernli, Falcone et al. BMJ Global Health, version 21.03.2023

- WHA27.55 (1974) Adequacy of health statistical information.
- WHA27.56 (1974) Appropriation resolution for the financial year 1975. Cited by: WHA28.8.
- WHA27.57 (1974) WHO expanded programme on immunization. Cited by: WHA29.63, WHA30.53, WHA30.54, WHA31.53.
- WHA27.58 (1974) Coordination and strengthening of leprosy control. Cited by: WHA28.56, WHA32.16.
- WHA27.59 (1974) Prevention of road traffic accidents. Cites: WHA19.36. Cited by: WHA57.10.
- WHA27.60 (1974) Fifth report on the world health situation. Cites: WHA23.24, WHA23.59. Cited by: WHA29.22.
- WHA27.61 (1974) WHO's role in the development and coordination of biomedical research. Cites: WHA25.60, WHA26.42. Cited by: WHA28.70, WHA28.71, WHA31.35, WHA32.15, WHA33.25.
- WHA27.62 (1974) Standardization of diagnostic materials. Cites: WHA25.47.
- WHA27.63 (1974) Long-term planning of international cooperation in cancer research. Cites: WHA26.61. Cited by: WHA28.85, WHA35.30.
- WHA27.64 (1974) Reports of the Executive Board on its fifty-second and fifty-third sessions.
- WHA28.1 (1975) Admission of a new member: Tonga.
- WHA28.2 (1975) Admission of a new member: Democratic Republic of Viet-Nam.
- WHA28.3 (1975) Admission of a new member: Mozambique.
- WHA28.4 (1975) Award of the Léon Bernard Foundation Medal and Prize.
- WHA28.5 (1975) Election of members entitled to designate a person to serve on the Executive Board.
- WHA28.6 (1975) Financial report on the accounts of WHO for the year 1974 and report of the external auditor.
- WHA28.7 (1975) Status of collection of annual contributions and of advances to the Working Capital Fund.
- WHA28.8 (1975) Supplementary budget for 1975. Cites: WHA27.56.
- WHA28.9 (1975) Salaries and allowances for ungraded posts.
- WHA28.10 (1975) Salary of the Director-General.
- WHA28.11 (1975) Assessment for 1975 of Botswana. Cites: WHA22.6, WHA26.21.
- WHA28.12 (1975) Assessment for 1974 and future years of Grenada. Cites: WHA22.6. Cited by: WHA29.15.
- WHA28.13 (1975) Assessment for 1975 and future years of Tonga. Cites: WHA22.6. Cited by: WHA29.15.
- WHA28.14 (1975) Assessment for 1975 and future years of the Democratic Republic of Viet-Nam. Cites: WHA22.6. Cited by: WHA30.13.
- WHA28.15 (1975) Assessment for 1975 and future years of Mozambique. Cites: WHA22.6. Cited by: WHA30.6.
- WHA28.16 (1975) Assessment for 1972 and 1973 of Pakistan.
- WHA28.17 (1975) Scale of assessment for 1976. Cites: WHA26.21, WHA27.9.
- WHA28.18 (1975) Members in arrears in the payment of their contributions to an extent which may invoke Article 7 of the Constitution. Cites: WHA8.13.
- WHA28.19 (1975) Procedure for election of six members entitled to designate a person to serve on the Executive Board.
- WHA28.20 (1975) Annual report of the Director-General for 1974.
- WHA28.21 (1975) Award of the Dr A. T. Shousha Foundation Medal and Prize.
- WHA28.22 (1975) Proposal for constitutional amendment to allow for further increase in the membership of the Executive Board.
- WHA28.23 (1975) Study of the possibility of financing WHO activities in currencies other than US dollars and Swiss francs. Cites: WHA2.58.
- WHA28.24 (1975) Headquarters accommodation: future requirements. Cites: WHA27.14.
- WHA28.25 (1975) Review of the Working Capital Fund.
- WHA28.26 (1975) Real estate fund.

Wernli, Falcone et al. BMJ Global Health, version 21.03.2023

- WHA28.27 (1975) Appointment of the external auditor.
- WHA28.28 (1975) International Civil Service Commission.
- WHA28.29 (1975) Annual reporting by the Director-General.
- WHA28.30 (1975) Organizational study on the interrelationships between the central technical services of WHO and programmes of direct assistance to Member States. Cites: WHA26.36, WHA27.18.
- WHA28.31 (1975) Organizational study on the planning for and impact of extrabudgetary resources on WHO's programmes and policy. Cites: WHA27.19. Cited by: WHA28.32.
- WHA28.32 (1975) Future organizational study by the Executive Board. Cites: WHA9.30, WHA28.31.
- WHA28.33 (1975) Use of Chinese as a working language of the World Health Assembly and the Executive Board. Cited by: WHA29.37.
- WHA28.34 (1975) Use of Arabic as a working language of the World Health Assembly and the Executive Board.
- WHA28.35 (1975) Health assistance to refugees and displaced persons in the Middle East. Cites: WHA24.33, WHA26.56, WHA27.36, WHA27.37, WHA27.42. Cited by: WHA29.69.
- WHA28.36 (1975) Use of German as a working language in the Regional Organization for Europe. Cited by: WHA30.7.
- WHA28.37 (1975) Participation in the Regional Committee for Africa of Members not having their seat of government within the region.
- WHA28.38 (1975) Use of travel funds in WHO. Cites: WHA1.91, WHA1.139, WHA2.46. Cited by: WHA30.10, WHA30.11.
- WHA28.39 (1975) Coordination with the United Nations system: general matters.
- WHA28.40 (1975) Tasks of WHO in connexion with International Women's Year. Cites: WHA1.43, WHA23.61. Cited by: WHA33.30, WHA36.21, WHA38.27, WHA42.42.
- WHA28.41 (1975) UNDP-supported activities and those financed from other extrabudgetary sources.
- WHA28.42 (1975) United Nations World Food Conference. Cited by: WHA31.47, WHA34.23.
- WHA28.43 (1975) Activities of the World Health Organization with regard to assistance to liberation movements in southern Africa pursuant to United Nations General Assembly resolution 2918 (XXVII) and Economic and Social Council resolution 1804 (LV). Cites: WHA27.36, WHA27.37.
- WHA28.44 (1975) World Population Year and Conference, 1974. Cited by: WHA31.37.
- WHA28.45 (1975) WHO activities related to disasters and natural catastrophes. Cited by: WHA46.6.
- WHA28.46 (1975) Assistance to meet urgent health problems resulting from the drought in Somalia.
- WHA28.47 (1975) Health assistance to refugees and displaced persons in Cyprus. Cited by: WHA29.44, WHA30.26, WHA31.25, WHA32.18, WHA33.22, WHA34.20, WHA35.18, WHA36.22, WHA37.24, WHA38.25, WHA39.11, WHA40.22, WHA41.22, WHA42.23, WHA43.13, WHA44.38.
- WHA28.48 (1975) Drought in the Sahelian zone. Cites: WHA27.48. Cited by: WHA29.39, WHA34.26.
- WHA28.49 (1975) Technical assistance to Portugal. Cites: WHA21.34.
- WHA28.50 (1975) Psychosocial factors and health. Cites: WHA27.53.
- WHA28.51 (1975) WHO activities in regard to the development of methods of controlling the tropical parasitic diseases. Cites: WHA27.52. Cited by: WHA28.71, WHA29.71.
- WHA28.52 (1975) Smallpox eradication programme. Cites: WHA11.54, WHA19.16.
- WHA28.53 (1975) Schistosomiasis. Cited by: WHA28.71, WHA29.58, WHA54.19, WHA65.21.
- WHA28.54 (1975) Prevention of blindness. Cites: WHA22.29, WHA25.55. Cited by: WHA37.18, WHA42.28, WHA45.10, WHA45.33, WHA51.11, WHA56.26.
- WHA28.55 (1975) Mycotic diseases. Cited by: WHA29.59.
- WHA28.56 (1975) Leprosy control. Cites: WHA5.28, WHA27.58. Cited by: WHA29.70.
- WHA28.57 (1975) Mental retardation.
- WHA28.58 (1975) Control of sexually transmitted diseases. Cited by: WHA31.57, WHA32.16.
- WHA28.59 (1975) Rheumatic diseases. Cites: WHA1.15, WHA3.29.
- WHA28.60 (1975) Effective working budget and budget level for 1976.

Wernli, Falcone et al. BMJ Global Health, version 21.03.2023

- WHA28.61 (1975) Election of six further members entitled to designate a person to serve on the Executive Board.
- WHA28.62 (1975) Safe use of pesticides: classification of pesticides according to hazard.
- WHA28.63 (1975) WHO's human health and environment programme: coordination on programmes and action in the field of the environment. Cites: WHA27.49, WHA27.50. Cited by: WHA29.45, WHA30.47.
- WHA28.64 (1975) Fluoridation and dental health. Cited by: WHA31.50, WHA42.39, WHA60.17.
- WHA28.65 (1975) Good practices in the manufacture and quality control of drugs and certification scheme on the quality of pharmaceutical products moving in international commerce. Cites: WHA22.50, WHA23.45, WHA25.61. Cited by: WHA45.28, WHA47.11.
- WHA28.66 (1975) Prophylactic and therapeutic substances. Cited by: WHA29.71, WHA31.32, WHA67.22.
- WHA28.67 (1975) Annual report of the United Nations Joint Staff Pension Board for 1973.
- WHA28.68 (1975) Appointment of representatives to the WHO Staff Pension Committee.
- WHA28.69 (1975) Method of work of the World Health Assembly. Cites: WHA26.1, WHA26.38. Cited by: WHA32.36, WHA35.2.
- WHA28.70 (1975) WHO's role in the development and coordination of biomedical research. Cites: WHA23.59, WHA25.60, WHA26.42, WHA27.61. Cited by: WHA31.35, WHA32.15, WHA33.25.
- WHA28.71 (1975) WHO's role in the development and coordination of research in tropical diseases. Cites: WHA27.52, WHA27.61, WHA28.51, WHA28.53. Cited by: WHA29.71.
- WHA28.72 (1975) Utilization and supply of human blood and blood products. Cited by: WHA58.13, WHA63.12, WHA63.18, WHA67.6.
- WHA28.73 (1975) Occupational health programme. Cites: WHA25.63.
- WHA28.74 (1975) Biennial budgeting. Cites: WHA26.37.
- WHA28.75 (1975) Assistance to developing countries - I. Cites: WHA14.37, WHA14.58, WHA15.22, WHA20.50, WHA21.47, WHA23.59, WHA23.61. Cited by: WHA30.30, WHA30.43, WHA31.41, WHA32.27, WHA34.24, WHA38.23.
- WHA28.76 (1975) Programme budget policy with regard to technical assistance to developing countries. Cited by: WHA29.48, WHA30.30, WHA30.43, WHA31.31, WHA31.41, WHA32.27, WHA34.24, WHA38.23.
- WHA28.77 (1975) Assistance to developing countries - II.
- WHA28.78 (1975) Assistance to newly independent and emerging States in Africa. Cited by: WHA29.23, WHA42.18.
- WHA28.79 (1975) Special assistance to Cambodia, the Democratic Republic of Viet-Nam, and the Republic of South Viet-Nam. Cited by: WHA29.24.
- WHA28.80 (1975) Drug dependence. Cites: WHA23.42, WHA24.57, WHA25.62, WHA26.52. Cited by: WHA33.27.
- WHA28.81 (1975) Health statistics related to alcohol. Cited by: WHA32.40.
- WHA28.82 (1975) Prevention of rickets, osteomalacia and osteoporosis.
- WHA28.83 (1975) The need for laboratory animals for the control of biological products and the establishment of breeding colonies. Cited by: WHA29.67.
- WHA28.84 (1975) Promotion of mental health. Cited by: WHA32.13, WHA32.40, WHA39.25, WHA42.20, WHA55.10.
- WHA28.85 (1975) Long-term planning of international cooperation in cancer research. Cites: WHA26.61, WHA27.63. Cited by: WHA30.41, WHA35.30.
- WHA28.86 (1975) Appropriation resolution for the financial year 1976. Cited by: WHA29.25.
- WHA28.87 (1975) Development of the antimalaria programme. Cites: WHA27.51. Cited by: WHA29.73, WHA38.24.
- WHA28.88 (1975) Promotion of national health services relating to primary health care. Cites: WHA20.53, WHA23.61, WHA25.17, WHA26.35, WHA26.43, WHA27.44. Cited by: WHA29.74, WHA30.48, WHA34.14.

Wernli, Falcone et al. BMJ Global Health, version 21.03.2023

- WHA28.89 (1975) Reports of the Executive Board on its fifty-fourth and fifty-fifth sessions.
- WHA29.1 (1976) Admission of a new member: People's Republic of Angola.
- WHA29.2 (1976) Annual report of the Director-General for 1975.
- WHA29.3 (1976) Financial report on the accounts of WHO for the year 1975 and report of the external auditor.
- WHA29.4 (1976) Status of collection of annual contributions and of advances to the Working Capital Fund.
- WHA29.5 (1976) Members in arrears in the payment of their contributions to an extent which may invoke the provisions of Article 7 of the Constitution.
- WHA29.6 (1976) Assessment for 1975 and future years of the Comoros. Cites: WHA22.6. Cited by: WHA30.6.
- WHA29.7 (1976) Assessment for 1976 and future years of Cape Verde. Cites: WHA22.6. Cited by: WHA30.6.
- WHA29.8 (1976) Assessment for 1976 and future years of Sao Tome and Principe. Cites: WHA22.6. Cited by: WHA30.6.
- WHA29.9 (1976) Assessment for 1976 and future years of Surinam. Cites: WHA22.6. Cited by: WHA30.6.
- WHA29.10 (1976) Assessment for 1976 and future years of Papua New Guinea. Cites: WHA22.6. Cited by: WHA30.6.
- WHA29.11 (1976) Assessment for 1976 and future years of Angola. Cites: WHA22.6. Cited by: WHA31.15.
- WHA29.12 (1976) Assessment of the Republic of South Viet-Nam. Cited by: WHA30.13.
- WHA29.13 (1976) Assessment of Namibia. Cites: WHA27.9, WHA27.39.
- WHA29.14 (1976) Assessment of Bangladesh.
- WHA29.15 (1976) Assessment of Grenada, Guinea-Bissau, and Tonga. Cites: WHA8.5, WHA24.12, WHA26.21, WHA27.38, WHA28.12, WHA28.13.
- WHA29.16 (1976) Scale of assessment for 1977. Cites: WHA26.21, WHA27.9.
- WHA29.17 (1976) Use of Chinese as a working language of the World Health Assembly and of the Executive Board.
- WHA29.18 (1976) Award of the Dr A. T. Shousha Foundation Medal and Prize.
- WHA29.19 (1976) International Conference on Primary Health Care: cosponsorship by UNICEF and WHO.
- WHA29.20 (1976) Sixth general programme of work covering a specific period: 1978-1983. Cited by: WHA31.10.
- WHA29.21 (1976) Psychosocial factors and health. Cited by: WHA32.13, WHA32.40, WHA39.25, WHA55.10.
- WHA29.22 (1976) Report on the world health situation. Cites: WHA23.59, WHA27.60. Cited by: WHA36.35.
- WHA29.23 (1976) Assistance to newly independent and emerging States in Africa. Cites: WHA28.78. Cited by: WHA30.24, WHA31.52, WHA32.20, WHA32.21, WHA33.33, WHA34.31, WHA42.18.
- WHA29.24 (1976) Special assistance to Cambodia, the Democratic Republic of Viet-Nam, the Lao People's Democratic Republic, and the Republic of South Viet-Nam. Cites: WHA28.79. Cited by: WHA30.25.
- WHA29.25 (1976) Supplementary budget for 1976. Cites: WHA28.86.
- WHA29.26 (1976) Use of Arabic as a working language of the World Health Assembly and of the Executive Board.
- WHA29.27 (1976) Review of the Working Capital Fund.
- WHA29.28 (1976) Real estate fund.
- WHA29.29 (1976) Use of the Executive Board special fund. Cites: WHA7.24.
- WHA29.30 (1976) Election of members entitled to designate a person to serve on the Executive Board.

Wernli, Falcone et al. BMJ Global Health, version 21.03.2023

- WHA29.31 (1976) Voluntary fund for health promotion. Cites: WHA13.24, WHA26.24.
- WHA29.32 (1976) Organizational study on the planning for and impact of extrabudgetary resources on WHO's programmes and policy. Cited by: WHA34.37.
- WHA29.33 (1976) Future organizational study by the Executive Board. Cited by: WHA30.16, WHA31.27.
- WHA29.34 (1976) Ninth revision of the International Classification of Diseases.
- WHA29.35 (1976) Activities related to the International Classification of Diseases.
- WHA29.36 (1976) Annual reporting by the Director-General and other documents on the work of WHO.
- WHA29.37 (1976) Amendments to the rules of procedures of the World Health Assembly. Cites: WHA28.33.
- WHA29.38 (1976) Amendments to Articles 24 and 25 of the Constitution.
- WHA29.39 (1976) Aid to the Sudano-Sahelian populations. Cites: WHA28.48.
- WHA29.40 (1976) Health and medical assistance to Lebanon. Cited by: WHA30.27, WHA31.26, WHA32.19, WHA33.23, WHA34.21, WHA35.19, WHA36.23, WHA37.25, WHA38.26, WHA39.12, WHA40.21, WHA41.21, WHA42.22.
- WHA29.41 (1976) Coordination within the United Nations system: general matters.
- WHA29.42 (1976) UNDP-supported activities: financial situation.
- WHA29.43 (1976) International Women's Year. Cited by: WHA33.30, WHA38.27, WHA42.42.
- WHA29.44 (1976) Health assistance to refugees and displaced persons in Cyprus. Cites: WHA28.47. Cited by: WHA30.26, WHA31.25, WHA32.18, WHA33.22, WHA34.20, WHA35.18, WHA36.22, WHA37.24, WHA38.25, WHA39.11, WHA40.22, WHA41.22, WHA42.23, WHA43.13, WHA44.38.
- WHA29.45 (1976) WHO's human health and environment programme. Cites: WHA26.58, WHA27.49, WHA27.50, WHA28.63. Cited by: WHA30.33, WHA30.47, WHA31.29.
- WHA29.46 (1976) Health aspects of human settlements. Cited by: WHA30.33.
- WHA29.47 (1976) Community water supply and excreta disposal. Cited by: WHA30.33, WHA34.25.
- WHA29.48 (1976) Programme budget policy. Cites: WHA28.76. Cited by: WHA30.30, WHA30.43, WHA31.13, WHA31.31, WHA31.37, WHA31.41, WHA32.27, WHA34.24, WHA38.11, WHA38.23, WHA48.26.
- WHA29.49 (1976) Cardiovascular diseases. Cites: WHA19.38, WHA25.44. Cited by: WHA36.32, WHA38.30.
- WHA29.50 (1976) Birth defect surveillance.
- WHA29.51 (1976) Award of the Léon Bernard Foundation Medal and Prize.
- WHA29.52 (1976) Effective working budget and budget level for 1977.
- WHA29.53 (1976) Appropriation resolution for the financial year 1977.
- WHA29.54 (1976) Smallpox eradication programme. Cited by: WHA30.52.
- WHA29.55 (1976) Smoking and health. Cites: WHA23.32, WHA24.48. Cited by: WHA31.56, WHA33.35, WHA42.41, WHA49.17.
- WHA29.56 (1976) Establishment of a WHO collaborating centre for the International Classification of Diseases in Portuguese.
- WHA29.57 (1976) Occupational health programme. Cited by: WHA30.47, WHA32.14.
- WHA29.58 (1976) Schistosomiasis. Cites: WHA28.53. Cited by: WHA54.19, WHA65.21.
- WHA29.59 (1976) Mycotic infections. Cites: WHA28.55.
- WHA29.60 (1976) Annual report of the United Nations Joint Staff Pension Board for 1974.
- WHA29.61 (1976) Appointment of representatives to the WHO Staff Pension Committee.
- WHA29.62 (1976) Reports of the Executive Board on its fifty-sixth and fifty-seventh sessions.
- WHA29.63 (1976) Expanded programme on immunization. Cites: WHA27.57. Cited by: WHA30.53, WHA30.54, WHA31.53.
- WHA29.64 (1976) Development and coordination of biomedical research. Cites: WHA25.60. Cited by: WHA31.35, WHA32.15, WHA33.25.

Wernli, Falcone et al. BMJ Global Health, version 21.03.2023

- WHA29.65 (1976) Système international d'Unités: use of SI units in medicine. Cited by: WHA30.39, WHA34.27.
- WHA29.66 (1976) Rheumatic diseases.
- WHA29.67 (1976) The need for laboratory animals (nonhuman primates) for the control of biological products and the establishment of breeding colonies. Cites: WHA28.83.
- WHA29.68 (1976) Disability prevention and rehabilitation. Cites: WHA19.37. Cited by: WHA38.18, WHA45.10.
- WHA29.69 (1976) Health assistance to refugees and displaced persons in the Middle East. Cites: WHA24.33, WHA26.56, WHA28.35. Cited by: WHA30.37.
- WHA29.70 (1976) Leprosy control. Cites: WHA28.56. Cited by: WHA30.36, WHA32.39.
- WHA29.71 (1976) Intensification of research on parasitic and other communicable and tropical diseases. Cites: WHA27.52, WHA28.51, WHA28.66, WHA28.71. Cited by: WHA30.42.
- WHA29.72 (1976) Health manpower development. Cites: WHA24.59, WHA25.42, WHA27.31. Cited by: WHA30.48, WHA34.14, WHA40.33, WHA42.43, WHA44.34, WHA56.31, WHA62.13, WHA67.18.
- WHA29.73 (1976) Development of the antimalaria programme. Cites: WHA28.87. Cited by: WHA38.24.
- WHA29.74 (1976) Promotion of national health services and health technology relating to primary health care and rural development. Cites: WHA23.61, WHA25.17, WHA26.35, WHA26.43, WHA27.44, WHA28.88. Cited by: WHA31.34, WHA32.16.
- WHA30.1 (1977) Amendment to the rules of procedure of the Health Assembly: increase in the membership of the General Committee.
- WHA30.2 (1977) Seventy-fifth anniversary of the Pan American Health Organization.
- WHA30.3 (1977) Financial report on the accounts of WHO for 1976, and report of the external Auditor.
- WHA30.4 (1977) Status of collection of annual contributions and of advances to the Working Capital Fund.
- WHA30.5 (1977) Method of establishment of the WHO scale of assessment. Cites: WHA8.5, WHA24.12, WHA26.21.
- WHA30.6 (1977) Assessment of the Comoros, Cape Verde, Mozambique, Sao Tome and Principe, Surinam, and Papua New Guinea. Cites: WHA8.5, WHA24.12, WHA26.21, WHA28.15, WHA29.6, WHA29.7, WHA29.8, WHA29.9, WHA29.10.
- WHA30.7 (1977) Phased extension of the use of the German language in the Regional Office for Europe. Cites: WHA28.36.
- WHA30.8 (1977) Salaries and allowances: ungraded categories of post.
- WHA30.9 (1977) Amendment to the contract of the Director-General.
- WHA30.10 (1977) Reimbursement of travelling expenses and payment of per diem for members of the Executive Board. Cites: WHA22.5, WHA28.38. Cited by: WHA55.22.
- WHA30.11 (1977) Reimbursement of travelling expenses for attendance at the Health Assembly. Cites: WHA28.38. Cited by: WHA50.1.
- WHA30.12 (1977) Members in arrears in the payment of their contributions to an extent which may invoke the provisions of Article 7 of the Constitution.
- WHA30.13 (1977) Assessment of the Socialist Republic of Viet Nam. Cites: WHA28.14, WHA29.12. Cited by: WHA32.7.
- WHA30.14 (1977) Scale of assessment for 1978.
- WHA30.15 (1977) Appointment of the external auditor.
- WHA30.16 (1977) Organizational study on WHO's role at the country level, particularly the role of the WHO representatives. Cites: WHA29.33. Cited by: WHA31.27.
- WHA30.17 (1977) Future organizational study by the Executive Board. Cited by: WHA33.20.
- WHA30.18 (1977) Action in respect of international conventions on narcotic drugs: implementation of the convention on psychotropic substances - functions and responsibilities of WHO. Cites: WHA7.6, WHA18.46.



Wernli, Falcone et al. BMJ Global Health, version 21.03.2023

- WHA30.19 (1977) Nineteenth report of the Committee on International Surveillance of Communicable Diseases.
- WHA30.20 (1977) Biennial programme budget: introduction of biennial budget cycle. Cites: WHA26.37, WHA26.38. Cited by: WHA30.21, WHA30.22.
- WHA30.21 (1977) Biennial programme budget: amendments to the financial regulations. Cites: WHA30.20.
- WHA30.22 (1977) Biennial programme budget: amendments to the rules of procedure of the Health Assembly. Cites: WHA30.20.
- WHA30.23 (1977) Development of programme budgeting and management of WHO's resources at country level. Cites: WHA25.23. Cited by: WHA38.11.
- WHA30.24 (1977) Assistance to newly independent and emerging States in Africa. Cites: WHA29.23. Cited by: WHA31.52, WHA32.20, WHA32.21, WHA32.22, WHA33.33, WHA34.31, WHA34.34, WHA42.18.
- WHA30.25 (1977) Special assistance to Democratic Kampuchea, the Lao People's Democratic Republic, and the Socialist Republic of Viet Nam. Cites: WHA29.24.
- WHA30.26 (1977) Health assistance to refugees and displaced persons in Cyprus. Cites: WHA28.47, WHA29.44. Cited by: WHA31.25, WHA32.18, WHA33.22, WHA34.20, WHA35.18, WHA36.22, WHA37.24, WHA38.25, WHA39.11, WHA40.22, WHA41.22, WHA42.23, WHA43.13, WHA44.38.
- WHA30.27 (1977) Health and medical assistance to Lebanon. Cites: WHA29.40. Cited by: WHA31.26, WHA32.19, WHA33.23, WHA34.21, WHA35.19, WHA36.23, WHA37.25, WHA38.26, WHA39.12, WHA40.21, WHA41.21, WHA42.22.
- WHA30.28 (1977) Continuation of the Joint Inspection Unit. Cites: WHA20.22, WHA24.53, WHA26.50.
- WHA30.29 (1977) Assessment of Namibia. Cited by: WHA43.22.
- WHA30.30 (1977) Programme budget policy. Cites: WHA28.75, WHA28.76, WHA29.48. Cited by: WHA31.31, WHA31.41, WHA32.27, WHA34.24, WHA38.23.
- WHA30.31 (1977) Appropriation resolution for the financial year 1978. Cited by: WHA31.8.
- WHA30.32 (1977) Development of codes of medical ethics. Cited by: WHA42.35, WHA46.39.
- WHA30.33 (1977) United Nations Water Conference. Cites: WHA29.45, WHA29.46, WHA29.47. Cited by: WHA31.40, WHA32.11, WHA34.25.
- WHA30.34 (1977) Coordination within the United Nations system: general matters. Cited by: WHA31.51.
- WHA30.35 (1977) Assignment of Ethiopia to the African Region.
- WHA30.36 (1977) Leprosy control. Cites: WHA29.70. Cited by: WHA32.39.
- WHA30.37 (1977) Health assistance to refugees and displaced persons in the Middle East. Cites: WHA26.56, WHA29.69. Cited by: WHA31.38.
- WHA30.38 (1977) Mental retardation. Cited by: WHA39.25, WHA55.10.
- WHA30.39 (1977) Système international d'Unités: use of SI units in medicine. Cites: WHA29.65. Cited by: WHA34.27.
- WHA30.40 (1977) Development and coordination of biomedical and health services research. Cited by: WHA31.35, WHA32.15, WHA32.27, WHA33.25.
- WHA30.41 (1977) Long-term planning of international cooperation in cancer research. Cites: WHA28.85. Cited by: WHA35.30.
- WHA30.42 (1977) Special programme for research and training in tropical diseases. Cites: WHA29.71. Cited by: WHA43.18.
- WHA30.43 (1977) Technical cooperation. Cites: WHA28.75, WHA28.76, WHA29.48. Cited by: WHA31.27, WHA31.41, WHA32.24, WHA32.27, WHA32.30, WHA33.24, WHA34.24, WHA34.36, WHA34.37, WHA37.16, WHA37.17, WHA38.21, WHA38.23, WHA39.7, WHA39.15, WHA41.26, WHA41.34, WHA42.2, WHA45.4, WHA46.17, WHA62.14.
- WHA30.44 (1977) Health legislation. Cited by: WHA33.28.
- WHA30.45 (1977) Special programme of technical cooperation in mental health. Cited by: WHA32.13.
- WHA30.46 (1977) Information systems and services. Cites: WHA27.32. Cited by: WHA31.20.

Wernli, Falcone et al. BMJ Global Health, version 21.03.2023

- WHA30.47 (1977) Evaluation of the effects of chemicals on health. Cites: WHA26.58, WHA27.49, WHA28.63, WHA29.45, WHA29.57. Cited by: WHA31.28, WHA31.29, WHA45.32, WHA50.13, WHA63.25.
- WHA30.48 (1977) The role of nursing/midwifery personnel in primary health care teams. Cites: WHA28.88, WHA29.72. Cited by: WHA36.11.
- WHA30.49 (1977) Promotion and development of training and research in traditional medicine. Cited by: WHA40.33, WHA42.43, WHA44.34, WHA56.31, WHA62.13, WHA67.18.
- WHA30.50 (1977) Method of work of the Health Assembly and of the Executive Board.
- WHA30.51 (1977) The role of the health sector in the development of national and international food and nutrition policies and plans. Cited by: WHA31.47, WHA31.49.
- WHA30.52 (1977) Smallpox eradication. Cites: WHA29.54.
- WHA30.53 (1977) Expanded programme on immunization. Cites: WHA27.57, WHA29.63. Cited by: WHA31.53, WHA41.28.
- WHA30.54 (1977) Regional production of vaccines for the expanded programme on immunization. Cites: WHA27.57, WHA29.63. Cited by: WHA31.53.
- WHA31.1 (1978) Method of work of the Health Assembly - I. Cited by: WHA35.1.
- WHA31.2 (1978) Message of sympathy to the Italian Government.
- WHA31.3 (1978) Appointment of the Director-General.
- WHA31.4 (1978) Contract of the Director-General.
- WHA31.5 (1978) Financial report on the accounts of WHO for 1977, and report of the external auditor.
- WHA31.6 (1978) Status of collection of annual contributions and of advances to the Working Capital Fund.
- WHA31.7 (1978) Use of casual income to reduce adverse effects of currency fluctuations on the programme budget. Cited by: WHA32.3.
- WHA31.8 (1978) Supplementary budget for 1978. Cites: WHA30.31.
- WHA31.9 (1978) Method of work of the Health Assembly - II. Cited by: WHA47.14.
- WHA31.10 (1978) Medium-term programming for the implementation of the sixth general programme of work covering a specific period (1978-1983 inclusive). Cites: WHA29.20. Cited by: WHA31.43.
- WHA31.11 (1978) Development of health programme evaluation. Cited by: WHA31.43.
- WHA31.12 (1978) Country health programming. Cites: WHA23.61. Cited by: WHA31.43, WHA34.14.
- WHA31.13 (1978) Documentation and languages of the Health Assembly and the Executive Board. Cites: WHA29.48. Cited by: WHA46.11, WHA50.32.
- WHA31.14 (1978) Assessment of Djibouti. Cites: WHA22.6. Cited by: WHA32.6.
- WHA31.15 (1978) Assessment of Angola. Cites: WHA8.5, WHA24.12, WHA26.21, WHA29.11.
- WHA31.16 (1978) Scale of assessment for 1979.
- WHA31.17 (1978) Appointment of external auditor.
- WHA31.18 (1978) WHO Constitution: adoption of Arabic text and amendment to Article 74.
- WHA31.19 (1978) Agreement with the Islamic Development Bank.
- WHA31.20 (1978) Development of health information systems. Cites: WHA30.46. Cited by: WHA31.43.
- WHA31.21 (1978) Medium-term programme for mental health.
- WHA31.22 (1978) Appropriation resolution for the financial year 1978. Cited by: WHA32.3.
- WHA31.23 (1978) Tentative budgetary projections for the biennium 1980-1981.
- WHA31.24 (1978) Members in arrears in the payment of their contributions to an extent which may invoke the provisions of Article 7 of the Constitution.
- WHA31.25 (1978) Health assistance to refugees and displaced persons in Cyprus. Cites: WHA28.47, WHA29.44, WHA30.26. Cited by: WHA32.18, WHA33.22, WHA34.20, WHA35.18, WHA36.22, WHA37.24, WHA38.25, WHA39.11, WHA40.22, WHA41.22, WHA42.23, WHA43.13, WHA44.38.

Wernli, Falcone et al. BMJ Global Health, version 21.03.2023

- WHA31.26 (1978) Health and medical assistance to Lebanon. Cites: WHA29.40, WHA30.27. Cited by: WHA32.19, WHA33.23, WHA34.21, WHA35.19, WHA36.23, WHA37.25, WHA38.26, WHA39.12, WHA40.21, WHA41.21, WHA42.22.
- WHA31.27 (1978) Organizational study on WHO's role at the country level, particularly the role of the WHO representatives. Cites: WHA29.33, WHA30.16, WHA30.43. Cited by: WHA32.26, WHA33.17, WHA33.19.
- WHA31.28 (1978) Evaluation of the effects of chemicals on health. Cites: WHA30.47. Cited by: WHA45.32, WHA50.13, WHA63.25.
- WHA31.29 (1978) Evaluation of the effects of biological environmental factors on health. Cites: WHA29.45, WHA30.47.
- WHA31.30 (1978) Procedures for introducing changes into the sixth general programme of work covering a specific period (1978-1983 inclusive).
- WHA31.31 (1978) Monitoring of the implementation of programme budget policy and strategy. Cites: WHA28.76, WHA29.48, WHA30.30.
- WHA31.32 (1978) Action programme on essential drugs. Cites: WHA28.66. Cited by: WHA32.41, WHA35.27, WHA37.33, WHA46.19.
- WHA31.33 (1978) Medicinal plants. Cited by: WHA40.33, WHA41.19, WHA42.43, WHA56.31, WHA62.13, WHA67.18.
- WHA31.34 (1978) Appropriate technology for health. Cites: WHA29.74.
- WHA31.35 (1978) Development and coordination of biomedical and health services research. Cites: WHA25.60, WHA27.61, WHA28.70, WHA29.64, WHA30.40. Cited by: WHA32.15, WHA32.27.
- WHA31.36 (1978) Medium-term programme for health manpower development.
- WHA31.37 (1978) Special programme of research, development and research training in human reproduction. Cites: WHA18.49, WHA19.43, WHA20.41, WHA21.43, WHA22.32, WHA28.44, WHA29.48. Cited by: WHA42.42.
- WHA31.38 (1978) Health conditions of the Arab population in the occupied Arab territories, including Palestine. Cites: WHA26.56, WHA30.37.
- WHA31.39 (1978) Coordination within the United Nations system: general matters. Cited by: WHA34.30.
- WHA31.40 (1978) United Nations Water Conference. Cites: WHA30.33. Cited by: WHA32.11, WHA34.25.
- WHA31.41 (1978) Technical cooperation among developing countries. Cites: WHA28.75, WHA28.76, WHA29.48, WHA30.30, WHA30.43. Cited by: WHA32.35, WHA34.24, WHA37.16, WHA38.23, WHA42.37, WHA50.27, WHA51.16, WHA52.23, WHA54.13.
- WHA31.42 (1978) Education of people in community health. Cited by: WHA42.44.
- WHA31.43 (1978) Managerial processes for health development. Cites: WHA31.10, WHA31.11, WHA31.12, WHA31.20. Cited by: WHA34.14.
- WHA31.44 (1978) Control of diarrhoeal diseases. Cites: WHA31.47. Cited by: WHA32.16, WHA35.22, WHA40.34.
- WHA31.45 (1978) Malaria control strategy. Cites: WHA22.39. Cited by: WHA32.35, WHA38.24.
- WHA31.46 (1978) Cooperation with newly independent and emerging States in Africa: special programme for health cooperation with Lesotho.
- WHA31.47 (1978) The role of the health sector in the development of national and international food and nutrition policies and plans, with special reference to combating malnutrition. Cites: WHA27.43, WHA28.42, WHA30.51. Cited by: WHA31.44, WHA32.42, WHA33.32, WHA37.30, WHA39.28.
- WHA31.48 (1978) Prevention and control of zoonoses and foodborne diseases due to animal products.
- WHA31.49 (1978) Food hygiene. Cites: WHA25.59, WHA27.46, WHA30.51.
- WHA31.50 (1978) Fluorides and the prevention of dental caries. Cites: WHA22.30, WHA28.64. Cited by: WHA42.39, WHA60.17.
- WHA31.51 (1978) Activities financed from extrabudgetary sources within the United Nations system. Cites: WHA30.34. Cited by: WHA42.37, WHA50.27.

Wernli, Falcone et al. BMJ Global Health, version 21.03.2023

- WHA31.52 (1978) Cooperation with newly independent and emerging States in Africa: liberation struggle in Southern Africa. Cites: WHA29.23, WHA30.24. Cited by: WHA32.20, WHA32.21, WHA32.22, WHA33.33, WHA34.31, WHA42.18.
- WHA31.53 (1978) Expanded programme on immunization. Cites: WHA27.57, WHA29.63, WHA30.53, WHA30.54.
- WHA31.54 (1978) Smallpox eradication programme: current status and certification. Cited by: WHA51.16, WHA52.23, WHA54.13.
- WHA31.55 (1978) Maternal and child health. Cited by: WHA32.42, WHA33.32, WHA34.23, WHA38.22, WHA45.22.
- WHA31.56 (1978) Health hazards of smoking. Cites: WHA23.32, WHA24.48, WHA29.55. Cited by: WHA33.35, WHA39.14, WHA41.25, WHA49.17.
- WHA31.57 (1978) Control of sexually transmitted diseases. Cites: WHA28.58. Cited by: WHA42.41.
- WHA31.58 (1978) Control of endemic treponematoses.
- WHA32.1 (1979) Financial report on the accounts of WHO for 1978 and report of the external auditor thereon.
- WHA32.2 (1979) Status of collection of annual contributions and of advances to the Working Capital Fund.
- WHA32.3 (1979) Supplementary budgetary requirements for 1979. Cites: WHA31.7, WHA31.22.
- WHA32.4 (1979) Report on casual income.
- WHA32.5 (1979) Use of the Portuguese language at the Regional Office for Africa.
- WHA32.6 (1979) Assessment of Djibouti. Cites: WHA8.5, WHA24.12, WHA26.21, WHA31.14.
- WHA32.7 (1979) Assessment of Viet Nam. Cites: WHA8.5, WHA24.12, WHA26.21, WHA30.13.
- WHA32.8 (1979) Scale of assessment for the financial period 1980-1981. Cited by: WHA33.14.
- WHA32.9 (1979) Appointment of external auditor.
- WHA32.10 (1979) Review of the working capital fund. Cited by: WHA34.21.
- WHA32.11 (1979) Collaboration with the United Nations system: general matters: United Nations Water Conference: follow-up to the Mar del Plata Action Plan. Cites: WHA30.33, WHA31.40. Cited by: WHA34.25.
- WHA32.12 (1979) Members in arrears in the payment of their contributions to an extent which may invoke article 7 of the Constitution: amendment to Rule 72 of the Rules of Procedure of the World Health Assembly.
- WHA32.13 (1979) Development of the mental health programme. Cites: WHA28.84, WHA29.21, WHA30.45.
- WHA32.14 (1979) Workers' health programme. Cites: WHA29.57. Cited by: WHA33.31, WHA40.28.
- WHA32.15 (1979) Development and coordination of biomedical and health services research. Cites: WHA25.60, WHA27.61, WHA28.70, WHA29.64, WHA30.40, WHA31.35. Cited by: WHA33.25.
- WHA32.16 (1979) Health laboratory technology. Cites: WHA27.51, WHA27.58, WHA28.58, WHA29.74, WHA31.44.
- WHA32.17 (1979) Members in arrears in the payment of their contributions to an extent which may invoke article 7 of the Constitution.
- WHA32.18 (1979) Collaboration with the United Nations system: health assistance to refugees and displaced persons in Cyprus. Cites: WHA28.47, WHA29.44, WHA30.26, WHA31.25. Cited by: WHA33.22, WHA34.20, WHA35.18, WHA36.22, WHA37.24, WHA38.25, WHA39.11, WHA40.22, WHA41.22, WHA42.23, WHA43.13, WHA44.38.
- WHA32.19 (1979) Collaboration with the United Nations system: health and medical assistance to Lebanon. Cites: WHA29.40, WHA30.27, WHA31.26. Cited by: WHA33.23, WHA35.19, WHA36.23, WHA37.25, WHA38.26, WHA39.12, WHA40.21, WHA41.21, WHA42.22.
- WHA32.20 (1979) Collaboration with the United Nations system: cooperation with newly independent and emerging States in Africa: liberation struggle in Southern Africa. Cites: WHA29.23, WHA30.24, WHA31.52. Cited by: WHA33.33, WHA33.34, WHA34.31, WHA42.18.

Wernli, Falcone et al. BMJ Global Health, version 21.03.2023

- WHA32.21 (1979) Collaboration with the United Nations system: cooperation with newly independent and emerging States in Africa: liberation struggle in Southern Africa. Cites: WHA29.23, WHA30.24, WHA31.52. Cited by: WHA34.34, WHA42.18.
- WHA32.22 (1979) Collaboration with the United Nations system: cooperation with newly independent and emerging States in Africa: liberation struggle in Southern Africa. Cites: WHA30.24, WHA31.52. Cited by: WHA33.34.
- WHA32.23 (1979) Supplementary budgetary requirements for 1979: extended borrowing authority.
- WHA32.24 (1979) Collaboration with the United Nations system: general matters: coordination of activities with other United Nations agencies and attainment of health for all by the year 2000. Cites: WHA15.51, WHA20.54, WHA22.58, WHA23.53, WHA30.43. Cited by: WHA33.24, WHA34.24, WHA34.38, WHA34.39, WHA39.19.
- WHA32.25 (1979) Collaboration with the United Nations system: general matters: health Care of the Elderly. Cited by: WHA35.28, WHA40.29.
- WHA32.26 (1979) Method of work of the Health Assembly. Cites: WHA3.96, WHA5.22, WHA6.57, WHA11.25, WHA12.38, WHA31.27. Cited by: WHA33.19.
- WHA32.27 (1979) Collaboration with the United Nations system: technical cooperation among developing countries. Cites: WHA28.75, WHA28.76, WHA29.48, WHA30.30, WHA30.40, WHA30.43, WHA31.35. Cited by: WHA34.24, WHA38.23, WHA42.37, WHA50.27, WHA51.16, WHA52.23, WHA54.13.
- WHA32.28 (1979) Proposed appropriation resolution for the financial period 1980-1981. Cited by: WHA33.14.
- WHA32.29 (1979) Tentative budgetary projections for the financial period 1982-1983.
- WHA32.30 (1979) Formulating strategies for health for all by the year 2000. Cites: WHA30.43. Cited by: WHA33.17, WHA33.24, WHA34.14, WHA34.24, WHA34.36, WHA34.37, WHA34.38, WHA37.16, WHA39.15, WHA39.19, WHA41.34, WHA42.2, WHA47.9.
- WHA32.31 (1979) Review of the medium-term programme for the promotion of environmental health.
- WHA32.32 (1979) Smallpox eradication.
- WHA32.33 (1979) Respiratory diseases.
- WHA32.34 (1979) Emergencies caused by yellow fever and other communicable diseases. Cites: WHA23.34.
- WHA32.35 (1979) Development of the malaria action programme in Africa. Cites: WHA31.41, WHA31.45.
- WHA32.36 (1979) Method of work of the Health Assembly. Cites: WHA28.69. Cited by: WHA35.1, WHA44.30, WHA50.18.
- WHA32.37 (1979) Recruitment of international staff in WHO. Cited by: WHA33.30, WHA36.19.
- WHA32.38 (1979) Organization of a world fortnight on hygiene and cleanliness.
- WHA32.39 (1979) Leprosy. Cites: WHA29.70, WHA30.36. Cited by: WHA40.35.
- WHA32.40 (1979) Development of the WHO programme on alcohol-related problems. Cites: WHA28.81, WHA28.84, WHA29.21. Cited by: WHA36.12, WHA39.25, WHA42.41, WHA55.10, WHA58.26, WHA61.4.
- WHA32.41 (1979) Action programme on essential drugs. Cites: WHA31.32. Cited by: WHA35.27.
- WHA32.42 (1979) WHO long-term programme for maternal and child health. Cites: WHA27.43, WHA31.47, WHA31.55. Cited by: WHA33.32, WHA38.22, WHA40.27, WHA45.22, WHA46.18, WHA47.9, WHA47.10, WHA48.10.
- WHA33.1 (1980) Admission of a new member: San Marino.
- WHA33.2 (1980) Admission of a new member: Zimbabwe.
- WHA33.3 (1980) Declaration of global eradication of smallpox. Cited by: WHA33.4, WHA34.13, WHA49.10.
- WHA33.4 (1980) Global smallpox eradication. Cites: WHA11.54, WHA20.15, WHA33.3. Cited by: WHA49.10.

Wernli, Falcone et al. BMJ Global Health, version 21.03.2023

- WHA33.5 (1980) Financial report on the accounts of WHO for 1979 and report of the external auditor thereon.
- WHA33.6 (1980) Status of collection of annual contributions and of advances to the Working Capital Fund.
- WHA33.7 (1980) Members in arrears in the payment of their contributions to an extent which may invoke the provisions of article 7 of the Constitution. Cites: WHA8.13, WHA25.6.
- WHA33.8 (1980) Financial reports and extrabudgetary resources. Cites: WHA26.24.
- WHA33.9 (1980) Assessment of new members and associate members: assessment of the Seychelles. Cites: WHA8.5, WHA24.12, WHA26.21.
- WHA33.10 (1980) Assessment of new members and associate members: assessment of Equatorial Guinea. Cites: WHA8.5, WHA24.12, WHA26.21.
- WHA33.11 (1980) Assessment of new members and associate members: assessment of San Marino. Cites: WHA8.5, WHA24.12, WHA26.21.
- WHA33.12 (1980) Assessment of new members and associate members: unpaid contributions of Southern Rhodesia.
- WHA33.13 (1980) Assessment of new members and associate members: assessment of Zimbabwe. Cites: WHA22.6. Cited by: WHA35.8.
- WHA33.14 (1980) Amendment to the scale of assessments to be applied to the second year of the financial period 1980-1981. Cites: WHA8.5, WHA24.12, WHA26.21, WHA32.8, WHA32.28.
- WHA33.15 (1980) Real estate fund.
- WHA33.16 (1980) Transfer of the Regional Office for the Eastern Mediterranean: proposal for an Advisory Opinion of the International Court of Justice. Cited by: WHA34.11.
- WHA33.17 (1980) Study of the organization's structures in the light of its functions. Cites: WHA31.27, WHA32.30. Cited by: WHA34.22, WHA34.31, WHA35.1, WHA36.31, WHA37.17, WHA38.11, WHA38.21, WHA57.8.
- WHA33.18 (1980) Health conditions of the Arab population in the occupied Arab territories, including Palestine. Cites: WHA26.56. Cited by: WHA34.19, WHA35.15.
- WHA33.19 (1980) Periodicity of Health Assemblies. Cites: WHA31.27, WHA32.26. Cited by: WHA34.29.
- WHA33.20 (1980) Organizational study on the Role of WHO expert advisory panels and committees and collaborating centres in meeting the needs of WHO regarding expert advice and in carrying out technical activities of WHO. Cites: WHA30.17. Cited by: WHA50.2.
- WHA33.21 (1980) Collaboration with the United Nations system: agreement between WHO and the International Fund for Agricultural Development.
- WHA33.22 (1980) Collaboration with the United Nations system: health assistance to refugees and displaced persons in Cyprus. Cites: WHA28.47, WHA29.44, WHA30.26, WHA31.25, WHA32.18. Cited by: WHA34.20, WHA35.18, WHA36.22, WHA37.24, WHA38.25, WHA39.11, WHA40.22, WHA41.22, WHA42.23, WHA43.13, WHA44.38.
- WHA33.23 (1980) Collaboration with the United Nations system: health and medical assistance to Lebanon. Cites: WHA29.40, WHA30.27, WHA31.26, WHA32.19. Cited by: WHA34.21, WHA35.19, WHA36.23, WHA37.25, WHA38.26, WHA39.12, WHA40.21, WHA41.21, WHA42.22.
- WHA33.24 (1980) Formulating strategies for health for all by the year 2000: health as an integral part of development and of the new international economic order. Cites: WHA30.43, WHA32.24, WHA32.30. Cited by: WHA34.24, WHA34.36, WHA34.37, WHA34.38, WHA34.39, WHA39.15, WHA39.19.
- WHA33.25 (1980) Development and coordination of biomedical and health services research. Cites: WHA25.60, WHA27.61, WHA28.70, WHA29.64, WHA30.40, WHA32.15.
- WHA33.26 (1980) Tuberculosis control. Cited by: WHA36.30.
- WHA33.27 (1980) Action in respect of international conventions on narcotic and psychotropic substances: abuse of narcotic and psychotropic substances. Cites: WHA26.52, WHA28.80. Cited by: WHA37.23, WHA39.25, WHA39.26, WHA42.20, WHA55.10.



Wernli, Falcone et al. BMJ Global Health, version 21.03.2023

- WHA33.28 (1980) Health legislation: strengthening WHO's health legislation programme. Cites: WHA30.44.
- WHA33.29 (1980) Health legislation: reservations to the International Health Regulations.
- WHA33.30 (1980) Recruitment of international staff in WHO. Cites: WHA28.40, WHA29.43, WHA32.37. Cited by: WHA34.15.
- WHA33.31 (1980) Workers' health programme. Cites: WHA32.14. Cited by: WHA40.28, WHA49.12.
- WHA33.32 (1980) Infant and Young Child Feeding. Cites: WHA27.43, WHA31.47, WHA31.55, WHA32.42. Cited by: WHA34.22, WHA34.23, WHA35.26, WHA37.30, WHA39.28, WHA41.11, WHA43.3, WHA45.34, WHA47.5, WHA49.15, WHA54.2, WHA55.25, WHA63.23, WHA69.9, WHA71.9.
- WHA33.33 (1980) Collaboration with the United Nations system: cooperation with newly independent and emerging States in Africa: liberation struggle in Southern Africa: assistance to Front-Line States. Cites: WHA29.23, WHA30.24, WHA31.52, WHA32.20. Cited by: WHA34.31, WHA42.18.
- WHA33.34 (1980) Collaboration with the United Nations system: cooperation with newly independent and emerging States in Africa: liberation struggle in Southern Africa. Cites: WHA32.20, WHA32.22. Cited by: WHA34.31.
- WHA33.35 (1980) WHO's programme on smoking and health. Cites: WHA23.32, WHA24.48, WHA29.55, WHA31.56. Cited by: WHA39.14, WHA41.25, WHA42.41, WHA43.16, WHA44.26, WHA48.11, WHA49.17.
- WHA34.1 (1981) Interim financial report on the accounts of WHO for 1980 and report of the external auditor.
- WHA34.2 (1981) Status of collection of assessed contributions and status of advances to the Working Capital Fund.
- WHA34.3 (1981) Members in arrears in the payment of their contributions to an extent which may invoke the provisions of article 7 of the Constitution.
- WHA34.4 (1981) Reimbursement of travel costs of representatives to regional committees. Cited by: WHA52.9.
- WHA34.5 (1981) Report on casual income and budgetary rate of exchange between the US Dollar and the Swiss Franc for 1982-1983.
- WHA34.6 (1981) Assessment of new members and associate members: assessment of Saint Lucia. Cites: WHA8.5, WHA24.12, WHA26.21.
- WHA34.7 (1981) Scale of assessments for the financial period 1982-1983.
- WHA34.8 (1981) Salaries and allowances for ungraded posts and for the Director-General.
- WHA34.9 (1981) Appointment of the external auditor.
- WHA34.10 (1981) Headquarters accommodation requirements. Cited by: WHA36.17, WHA37.19.
- WHA34.11 (1981) Transfer of the Regional Office for the Eastern Mediterranean. Cites: WHA33.16. Cited by: WHA35.13.
- WHA34.12 (1981) Real estate fund.
- WHA34.13 (1981) Amendment of the International Health Regulations (1969). Cites: WHA22.47, WHA27.45, WHA33.3.
- WHA34.14 (1981) Organizational study on the role of WHO in training in public health and health programme management including the use of country health programming. Cites: WHA23.61, WHA26.35, WHA28.88, WHA29.72, WHA31.12, WHA31.43, WHA32.30.
- WHA34.15 (1981) Recruitment of international staff in WHO. Cites: WHA33.30. Cited by: WHA36.19.
- WHA34.16 (1981) Appropriation resolution for the financial period 1982-1983.
- WHA34.17 (1981) Collaboration with the United Nations system: general matters: programme support costs. Cites: WHA27.33.
- WHA34.18 (1981) Collaboration with the United Nations system: general matters: emergency health and medical assistance to Democratic Yemen, Djibouti, Ethiopia and Somalia.
- WHA34.19 (1981) Health conditions of the Arab population in the occupied Arab territories, including Palestine. Cites: WHA26.56, WHA33.18.

Wernli, Falcone et al. BMJ Global Health, version 21.03.2023

- WHA34.20 (1981) Collaboration with the United Nations system: health assistance to refugees and displaced persons in Cyprus. Cites: WHA28.47, WHA29.44, WHA30.26, WHA31.25, WHA32.18, WHA33.22. Cited by: WHA35.18, WHA36.22, WHA37.24, WHA38.25, WHA39.11, WHA40.22, WHA41.22, WHA42.23, WHA43.13, WHA44.38.
- WHA34.21 (1981) Collaboration with the United Nations system: health and medical assistance to Lebanon. Cites: WHA29.40, WHA30.27, WHA31.26, WHA32.10, WHA33.23. Cited by: WHA35.19, WHA36.23, WHA37.25, WHA38.26, WHA39.12, WHA40.21, WHA41.21, WHA42.22.
- WHA34.22 (1981) International Code of Marketing of Breastmilk Substitutes. Cites: WHA33.17, WHA33.32. Cited by: WHA35.26, WHA37.30, WHA39.28, WHA41.11, WHA43.3, WHA45.34, WHA47.5, WHA49.15, WHA54.2, WHA55.25, WHA58.32, WHA59.21, WHA61.20, WHA63.23, WHA69.9, WHA71.9.
- WHA34.23 (1981) Nutritional value and safety of products specifically intended for infant and young child feeding. Cites: WHA27.43, WHA28.42, WHA31.55, WHA33.32.
- WHA34.24 (1981) The meaning of WHO's international health work through coordination and technical cooperation. Cites: WHA23.59, WHA28.75, WHA28.76, WHA29.48, WHA30.30, WHA30.43, WHA31.41, WHA32.24, WHA32.27, WHA32.30, WHA33.24. Cited by: WHA38.11.
- WHA34.25 (1981) International Drinking Water Supply and Sanitation Decade. Cites: WHA29.47, WHA30.33, WHA31.40, WHA32.11. Cited by: WHA36.13, WHA39.21.
- WHA34.26 (1981) Promotion of prevention of adverse health effects of disasters and emergencies through preparedness. Cites: WHA28.48. Cited by: WHA42.16, WHA46.6, WHA46.28, WHA65.20.
- WHA34.27 (1981) Use of SI units in medicine: use of the kilopascal for blood pressure measurement. Cites: WHA29.65, WHA30.39.
- WHA34.28 (1981) Periodicity and duration of Health Assemblies: periodicity of Health Assemblies. Cites: WHA12.38.
- WHA34.29 (1981) Periodicity and duration of Health Assemblies: method of work and duration of Health Assemblies. Cites: WHA33.19. Cited by: WHA35.1, WHA35.2, WHA36.16.
- WHA34.30 (1981) Coordination with the United Nations system: International Year of Disabled Persons, 1981: WHO's cooperative activities within the United Nations system for disability prevention and rehabilitation. Cites: WHA31.39.
- WHA34.31 (1981) Collaboration with the United Nations system: cooperation with newly independent and emerging States in Africa: liberation struggle in Southern Africa: assistance to Front-Line States. Cites: WHA29.23, WHA30.24, WHA31.52, WHA32.20, WHA33.17, WHA33.33, WHA33.34. Cited by: WHA42.18.
- WHA34.32 (1981) Collaboration with the United Nations system: cooperation with newly independent and emerging States in Africa: special programme of cooperation with the Republic of Equatorial Guinea.
- WHA34.33 (1981) Collaboration with the United Nations system: cooperation with newly independent and emerging States in Africa: special programme of cooperation with the Republic of Chad.
- WHA34.34 (1981) Collaboration with the United Nations system: cooperation with newly independent and emerging States in Africa: liberation struggle in Southern Africa: assistance to Namibia. Cites: WHA30.24, WHA32.21.
- WHA34.35 (1981) Collaboration with the United Nations system: general matters: health assistance to refugees in Africa. Cited by: WHA35.29.
- WHA34.36 (1981) Global strategy for health for all by the year 2000. Cites: WHA30.43, WHA32.30, WHA33.24. Cited by: WHA35.23, WHA37.17, WHA38.21, WHA38.23, WHA38.31, WHA39.7, WHA39.15, WHA41.26, WHA41.34, WHA42.2, WHA42.26, WHA45.4, WHA46.17.
- WHA34.37 (1981) Resources for strategies for health for all by the year 2000 (draft resolution proposed by a working group). Cites: WHA27.29, WHA29.32, WHA30.43, WHA32.30, WHA33.24.
- WHA34.38 (1981) Health for all by the year 2000: the contribution of health to socioeconomic development and peace: implementation of resolution 34/58 of the United Nations General Assembly and of resolutions WHA32.24 and WHA33.24: the role of physicians and other health workers in the

Wernli, Falcone et al. BMJ Global Health, version 21.03.2023

- preservation and promotion of peace as the most significant factor for the attainment of health for all. Cites: WHA13.56, WHA13.67, WHA15.51, WHA17.45, WHA20.54, WHA22.58, WHA23.53, WHA32.24, WHA32.30, WHA33.24. Cited by: WHA36.28, WHA39.19, WHA40.24, WHA46.40.
- WHA34.39 (1981) The contribution of health to socioeconomic development and peace: implementation of resolution 34/58 of the United Nations General Assembly and of resolutions WHA32.24 and WHA33.24: material war remnants. Cites: WHA32.24, WHA33.24.
  - WHA35.1 (1982) Method of work of the Health Assembly. Cites: WHA31.1, WHA32.36, WHA33.17, WHA34.29. Cited by: WHA36.16, WHA36.31, WHA45.21, WHA46.29, WHA47.28, WHA48.31, WHA49.28.
  - WHA35.2 (1982) Changes in the programme budget for 1982-1983. Cites: WHA28.69, WHA34.29.
  - WHA35.3 (1982) Financial report and audited financial statements for the financial period of 1 January 1980 - 31 December 1981 and reports of the external auditor to the World Health Assembly.
  - WHA35.4 (1982) Status of collection of assessed contributions and status of advances to the Working Capital Fund.
  - WHA35.5 (1982) Members in arrears in the payment of their contributions to an extent which may invoke the provisions of article 7 of the Constitution.
  - WHA35.6 (1982) Assessment of Bhutan. Cites: WHA8.5, WHA24.12, WHA26.21.
  - WHA35.7 (1982) Assessment of Dominica. Cites: WHA8.5, WHA24.12, WHA26.21.
  - WHA35.8 (1982) Assessment of Zimbabwe. Cites: WHA8.5, WHA24.12, WHA26.21, WHA33.13.
  - WHA35.9 (1982) Review of the working capital fund.
  - WHA35.10 (1982) Regulations for expert advisory panels and committees. Cites: WHA4.14, WHA13.49. Cited by: WHA53.8, WHA55.24.
  - WHA35.11 (1982) Future organizational studies. Cites: WHA10.36.
  - WHA35.12 (1982) Real estate fund and Headquarters accommodation. Cited by: WHA36.17.
  - WHA35.13 (1982) Transfer of the Regional Office for the Eastern Mediterranean. Cites: WHA34.11. Cited by: WHA36.18, WHA37.20.
  - WHA35.14 (1982) Policy on patents.
  - WHA35.15 (1982) Health conditions of the Arab population in the occupied Arab territories, including Palestine. Cites: WHA26.56, WHA33.18. Cited by: WHA36.27.
  - WHA35.16 (1982) Collaboration with the United Nations system: general matters: emergency health and medical assistance to Democratic Yemen.
  - WHA35.17 (1982) Collaboration with the United Nations system: general matters: health implications of development schemes. Cites: WHA17.20, WHA18.45. Cited by: WHA42.26, WHA42.31, WHA64.24, WHA72.7.
  - WHA35.18 (1982) Collaboration with the United Nations system: health assistance to refugees and displaced persons in Cyprus: report by the Director-General. Cites: WHA28.47, WHA29.44, WHA30.26, WHA31.25, WHA32.18, WHA33.22, WHA34.20. Cited by: WHA36.22, WHA37.24, WHA38.25, WHA39.11, WHA40.22, WHA41.22, WHA42.23, WHA43.13, WHA44.38.
  - WHA35.19 (1982) Collaboration with the United Nations system: health and medical assistance to Lebanon. Cites: WHA29.40, WHA30.27, WHA31.26, WHA32.19, WHA33.23, WHA34.21. Cited by: WHA36.23, WHA37.25, WHA38.26, WHA39.12, WHA40.21, WHA41.21, WHA42.22.
  - WHA35.20 (1982) Collaboration with the United Nations system: cooperation with newly independent and emerging States in Africa: liberation struggle in Southern Africa: assistance to front-line States. Cited by: WHA42.18.
  - WHA35.21 (1982) Collaboration with the United Nations system: cooperation with newly independent and emerging States in Africa: liberation struggle in Southern Africa: assistance to Namibia and National Liberation Movements in South Africa recognized by the OUA.
  - WHA35.22 (1982) Diarrhoeal diseases control programme. Cites: WHA31.44. Cited by: WHA40.34.
  - WHA35.23 (1982) Plan of action for implementing the strategy for health for all by the year 2000. Cites: WHA34.36. Cited by: WHA36.35, WHA37.17, WHA38.21, WHA39.7, WHA42.2.
  - WHA35.24 (1982) Implementing the strategy for health for all. Cited by: WHA37.16, WHA38.23, WHA42.37, WHA50.27, WHA51.16, WHA52.23, WHA54.13.

Wernli, Falcone et al. BMJ Global Health, version 21.03.2023

- WHA35.25 (1982) Seventh general programme of work covering a specific period (1984-1989 inclusive).
- WHA35.26 (1982) International Code of Marketing of Breast-milk Substitutes. Cites: WHA33.32, WHA34.22. Cited by: WHA37.30, WHA39.28, WHA43.3, WHA45.34, WHA47.5, WHA54.2, WHA55.25, WHA59.21, WHA61.20, WHA63.23, WHA69.9, WHA71.9.
- WHA35.27 (1982) Action programme on essential drugs. Cites: WHA31.32, WHA32.41. Cited by: WHA37.32.
- WHA35.28 (1982) Health Care of the Elderly. Cites: WHA32.25. Cited by: WHA40.29.
- WHA35.29 (1982) Collaboration with the United Nations system: cooperation with newly independent and emerging States in Africa: liberation struggle in Southern Africa: health assistance to refugees in Africa. Cites: WHA34.35. Cited by: WHA36.26.
- WHA35.30 (1982) Long-term planning of international cooperation in the field of cancer. Cites: WHA26.61, WHA27.63, WHA28.85, WHA30.41.
- WHA35.31 (1982) Expanded programme on immunization. Cited by: WHA45.17.
- WHA36.1 (1983) Appointment of the Director-General.
- WHA36.2 (1983) Contract of the Director-General.
- WHA36.3 (1983) Interim financial report for the year 1982.
- WHA36.4 (1983) Status of collection of assessed contributions and status of advances to the Working Capital Fund.
- WHA36.5 (1983) Members in arrears in the payment of their contributions to an extent which may invoke Article 7 of the Constitution.
- WHA36.6 (1983) Report on casual income.
- WHA36.7 (1983) Assessment of Vanuatu. Cites: WHA8.5, WHA24.12, WHA26.21.
- WHA36.8 (1983) Assessment of the Solomon Islands. Cites: WHA8.5, WHA24.12, WHA26.21.
- WHA36.9 (1983) Scale of assessments for the financial period 1984-1985.
- WHA36.10 (1983) Appointment of the external auditor.
- WHA36.11 (1983) The role of nursing/midwifery personnel in the strategy of health for all. Cites: WHA30.48. Cited by: WHA42.27.
- WHA36.12 (1983) Alcohol consumption and alcohol-related problems: development of national policies and programmes. Cites: WHA32.40. Cited by: WHA42.20, WHA58.26, WHA61.4.
- WHA36.13 (1983) International Drinking Water Supply and Sanitation Decade. Cites: WHA34.25. Cited by: WHA39.20.
- WHA36.14 (1983) Oral health in the strategy of health for all. Cited by: WHA42.39, WHA60.17.
- WHA36.15 (1983) Reference substances for quality control of drugs (facilitation of their departure from and entry into member states).
- WHA36.16 (1983) Method of work and duration of the Health Assembly. Cites: WHA34.29, WHA35.1. Cited by: WHA46.11, WHA50.18.
- WHA36.17 (1983) Real estate fund and Headquarters accommodation. Cites: WHA34.10, WHA35.12. Cited by: WHA37.19.
- WHA36.18 (1983) Transfer of the Regional Office for the Eastern Mediterranean. Cites: WHA35.13. Cited by: WHA37.20.
- WHA36.19 (1983) Recruitment of international staff in WHO. Cites: WHA32.37, WHA34.15. Cited by: WHA38.12.
- WHA36.20 (1983) Collaboration within the United Nations system: general matters: health, medical and social assistance to the Yemen.
- WHA36.21 (1983) Collaboration within the United Nations system: general matters: contribution of the World Health Organization to Participation of Women in Promoting International Peace, Cooperation and Health. Cites: WHA28.40. Cited by: WHA38.27, WHA42.42.
- WHA36.22 (1983) Collaboration within the United Nations system: health assistance to refugees and displaced persons in Cyprus. Cites: WHA28.47, WHA29.44, WHA30.26, WHA31.25, WHA32.18,

Wernli, Falcone et al. BMJ Global Health, version 21.03.2023

- WHA33.22, WHA34.20, WHA35.18. Cited by: WHA37.24, WHA38.25, WHA39.11, WHA40.22, WHA41.22, WHA42.23, WHA43.13, WHA44.38.
- WHA36.23 (1983) Collaboration within the United Nations system: health and medical assistance to Lebanon. Cites: WHA29.40, WHA30.27, WHA31.26, WHA32.19, WHA33.23, WHA34.21, WHA35.19. Cited by: WHA39.12, WHA40.21, WHA41.21, WHA42.22.
  - WHA36.24 (1983) Collaboration within the United Nations system: cooperation with newly independent and emerging States in Africa: liberation struggle in Southern Africa: assistance to front-line States. Cited by: WHA42.18.
  - WHA36.25 (1983) Collaboration within the United Nations system: cooperation with newly independent and emerging States in Africa: liberation struggle in Southern Africa: assistance to Namibia and national liberation movements in South Africa recognized by the Organization of African Unity.
  - WHA36.26 (1983) Collaboration within the United Nations system: cooperation with newly independent and emerging States in Africa: liberation struggle in Southern Africa: health assistance to refugees in Africa. Cites: WHA35.29.
  - WHA36.27 (1983) Health conditions of the Arab population in the occupied Arab territories, including Palestine. Cites: WHA35.15. Cited by: WHA37.26, WHA38.15, WHA39.10.
  - WHA36.28 (1983) The role of physicians and other health workers in the preservation and promotion of peace as the most significant factor for the attainment of health for all. Cites: WHA34.38. Cited by: WHA39.19, WHA40.24, WHA46.40.
  - WHA36.29 (1983) Collaboration within the United Nations system: general matters: emergency health and medical assistance to drought-stricken and famine-affected countries in Africa. Cited by: WHA37.29, WHA38.29, WHA45.19.
  - WHA36.30 (1983) Tuberculosis control in the world - situation analysis. Cites: WHA33.26. Cited by: WHA44.8.
  - WHA36.31 (1983) African human trypanosomiasis. Cites: WHA33.17, WHA35.1.
  - WHA36.32 (1983) Prevention and control of cardiovascular diseases. Cites: WHA29.49. Cited by: WHA38.30.
  - WHA36.33 (1983) Appropriation resolution for the financial period 1984-1985. Cited by: WHA37.25, WHA38.26.
  - WHA36.34 (1983) Implementing the strategy for health for all. Cited by: WHA42.37, WHA50.27, WHA51.16, WHA52.23, WHA54.13.
  - WHA36.35 (1983) Methodology and content of the seventh report on the world health situation in relation to the monitoring and evaluation of the global strategy for health for all. Cites: WHA23.59, WHA29.22, WHA35.23. Cited by: WHA39.7.
  - WHA37.1 (1984) Admission of new member: Cook Islands.
  - WHA37.2 (1984) Admission of new member: Kiribati.
  - WHA37.3 (1984) Election of members entitled to designate a person to serve on the Executive Board.
  - WHA37.4 (1984) Financial report and audited financial statements for the financial period of 1 January 1982 - 31 December 1983 and reports of the external auditor to the World Health Assembly.
  - WHA37.5 (1984) Status of collection of assessed contributions and status of advances to the Working Capital Fund.
  - WHA37.6 (1984) Members in arrears in the payment of their contributions to an extent which may invoke Article 7 of the Constitution: Chad. Cites: WHA8.13.
  - WHA37.7 (1984) Members in arrears in the payment of their contributions to an extent which may invoke Article 7 of the Constitution. Cited by: WHA38.13, WHA41.7.
  - WHA37.8 (1984) Assessment of Saint Vincent and the Grenadines. Cites: WHA8.5, WHA24.12, WHA26.21.
  - WHA37.9 (1984) Assessment of Antigua and Barbuda. Cites: WHA8.5, WHA24.12, WHA26.21.
  - WHA37.10 (1984) Assessment of the Cook Islands. Cites: WHA22.6.
  - WHA37.11 (1984) Assessment of Kiribati. Cites: WHA22.6.
  - WHA37.12 (1984) Assignment of Algeria to the African Region.

Wernli, Falcone et al. BMJ Global Health, version 21.03.2023

- WHA37.13 (1984) The spiritual dimension in the global strategy for health for all by the year 2000.
- WHA37.14 (1984) Basic plan on priority health needs of Central America and Panama. Cited by: WHA39.23.
- WHA37.15 (1984) Health for all by the year 2000. Cited by: WHA42.37, WHA50.27, WHA51.16, WHA52.23, WHA54.13.
- WHA37.16 (1984) Technical cooperation among developing countries in support of the goal of health for all. Cites: WHA30.43, WHA31.41, WHA32.30, WHA35.24. Cited by: WHA38.23, WHA42.37, WHA50.27, WHA51.16, WHA52.23, WHA54.13.
- WHA37.17 (1984) Monitoring progress in implementing strategies for health for all by the year 2000. Cites: WHA30.43, WHA33.17, WHA34.36, WHA35.23. Cited by: WHA38.23, WHA39.7.
- WHA37.18 (1984) Prevention and control of vitamin A deficiency and xerophthalmia. Cites: WHA22.29, WHA25.55, WHA28.54. Cited by: WHA41.11, WHA42.28, WHA45.33.
- WHA37.19 (1984) Real estate fund and Headquarters accommodation. Cites: WHA34.10, WHA36.17.
- WHA37.20 (1984) Transfer of the Regional Office for the Eastern Mediterranean. Cites: WHA35.13, WHA36.18.
- WHA37.21 (1984) Restructuring the technical discussions. Cited by: WHA44.30.
- WHA37.22 (1984) Collaboration within the United Nations system - general matters: operational activities for development.
- WHA37.23 (1984) Collaboration within the United Nations system: general matters: abuse of Narcotic and Psychotropic substances. Cites: WHA33.27. Cited by: WHA39.26, WHA42.41.
- WHA37.24 (1984) Collaboration within the United Nations system: health assistance to refugees and displaced persons in Cyprus. Cites: WHA28.47, WHA29.44, WHA30.26, WHA31.25, WHA32.18, WHA33.22, WHA34.20, WHA35.18, WHA36.22. Cited by: WHA38.25, WHA39.11, WHA40.22, WHA41.22, WHA42.23, WHA43.13, WHA44.38.
- WHA37.25 (1984) Collaboration within the United Nations system: health and medical assistance to Lebanon. Cites: WHA29.40, WHA30.27, WHA31.26, WHA32.19, WHA33.23, WHA34.21, WHA35.19, WHA36.33. Cited by: WHA38.26, WHA39.12, WHA40.21, WHA41.21, WHA42.22.
- WHA37.26 (1984) Health conditions of the Arab population in the occupied Arab territories, including Palestine. Cites: WHA36.27. Cited by: WHA38.15, WHA39.10.
- WHA37.27 (1984) International standards and units for biological substances. Cites: WHA3.8, WHA18.7, WHA26.32. Cited by: WHA45.27.
- WHA37.28 (1984) Collaboration within the United Nations system: liberation struggle in Southern Africa: assistance to the front-line States, Lesotho and Swaziland. Cited by: WHA42.18.
- WHA37.29 (1984) Emergency health and medical assistance to drought-stricken and famine-affected countries in Africa. Cites: WHA36.29. Cited by: WHA38.29, WHA45.19.
- WHA37.30 (1984) Infant and young child nutrition. Cites: WHA27.43, WHA31.47, WHA33.32, WHA34.22, WHA35.26. Cited by: WHA39.28, WHA43.3, WHA45.34, WHA47.5, WHA54.2, WHA55.25, WHA59.21, WHA61.20, WHA63.23, WHA69.9, WHA71.9.
- WHA37.31 (1984) The role of universities in the strategies for health for all. Cited by: WHA39.22, WHA41.26.
- WHA37.32 (1984) Action programme on essential drugs and vaccines. Cites: WHA35.27. Cited by: WHA43.20, WHA45.27, WHA47.32.
- WHA37.33 (1984) Rational use of drugs. Cites: WHA24.56, WHA31.32. Cited by: WHA39.27, WHA41.16, WHA43.20, WHA45.28, WHA47.12, WHA47.17.
- WHA38.1 (1985) Assignment of Israel to the European Union.
- WHA38.2 (1985) Interim financial report for the year 1984.
- WHA38.3 (1985) Status of collection of assessed contributions and status of advances to the Working Capital Fund.
- WHA38.4 (1985) Report on casual income, budgetary exchange rates and other adjustments to the proposed programme budget for 1986-1987. Cited by: WHA39.4.
- WHA38.5 (1985) Assessment of Saint Christopher and Nevis. Cites: WHA8.5, WHA24.12, WHA26.21.



Wernli, Falcone et al. BMJ Global Health, version 21.03.2023

- WHA38.6 (1985) Assessment of Brunei Darussalam. Cites: WHA8.5, WHA24.12, WHA26.21.
- WHA38.7 (1985) Scale of assessments for the financial period 1986-1987. Cited by: WHA39.9.
- WHA38.8 (1985) Review of the working capital fund.
- WHA38.9 (1985) Real estate fund.
- WHA38.10 (1985) Salaries and allowances for ungraded posts and the Director-General.
- WHA38.11 (1985) Regional programme budget policy. Cites: WHA29.48, WHA30.23, WHA33.17, WHA34.24.
- WHA38.12 (1985) Recruitment of international staff in WHO: biennial report. Cites: WHA36.19. Cited by: WHA39.18, WHA40.9, WHA40.10, WHA42.13, WHA46.24, WHA49.9.
- WHA38.13 (1985) Members in arrears in the payment of their contributions to an extent which may invoke Article 7 of the Constitution. Cites: WHA37.7.
- WHA38.14 (1985) Number of members of the Executive Board. Cited by: WHA39.6.
- WHA38.15 (1985) Health conditions of the Arab population in the occupied Arab territories, including Palestine. Cites: WHA36.27, WHA37.26. Cited by: WHA39.10.
- WHA38.16 (1985) Collaboration within the United Nations system: general matters: additional support to national strategies for health for all in the least developed among developing countries. Cited by: WHA39.8.
- WHA38.17 (1985) Collaboration within the United Nations system: general matters: repercussions on health of economic and political sanctions between States.
- WHA38.18 (1985) Collaboration within the United Nations system: general matters: prevention of disability and rehabilitation of the disabled. Cites: WHA19.37, WHA29.68. Cited by: WHA42.28, WHA45.10.
- WHA38.19 (1985) Prevention of deafness and hearing impairment. Cited by: WHA42.28, WHA45.10, WHA48.9.
- WHA38.20 (1985) Implementation of the strategies for health for all by the year 2000. Cited by: WHA39.15.
- WHA38.21 (1985) Maintenance of national health budgets at a level compatible with attainment of the objective of health for all by the year 2000. Cites: WHA30.43, WHA33.17, WHA34.36, WHA35.23.
- WHA38.22 (1985) Maturity before childbearing and promotion of responsible parenthood. Cites: WHA31.55, WHA32.42. Cited by: WHA40.27, WHA42.41, WHA46.18, WHA46.27, WHA47.10, WHA48.10, WHA64.28.
- WHA38.23 (1985) Technical cooperation among developing countries in support of the goal of health for all. Cites: WHA28.75, WHA28.76, WHA29.48, WHA30.30, WHA30.43, WHA31.41, WHA32.27, WHA34.36, WHA35.24, WHA37.16, WHA37.17. Cited by: WHA42.37, WHA50.27, WHA51.16, WHA52.23, WHA54.13.
- WHA38.24 (1985) Malaria control. Cites: WHA28.87, WHA29.73, WHA31.45. Cited by: WHA42.31, WHA49.11.
- WHA38.25 (1985) Collaboration within the United Nations system: health assistance to refugees and displaced persons in Cyprus. Cites: WHA28.47, WHA29.44, WHA30.26, WHA31.25, WHA32.18, WHA33.22, WHA34.20, WHA35.18, WHA36.22, WHA37.24. Cited by: WHA39.11, WHA40.22, WHA41.22, WHA42.23, WHA43.13, WHA44.38.
- WHA38.26 (1985) Collaboration within the United Nations system: health and medical assistance to Lebanon. Cites: WHA29.40, WHA30.27, WHA31.26, WHA32.19, WHA33.23, WHA34.21, WHA35.19, WHA36.33, WHA37.25. Cited by: WHA39.12, WHA40.21, WHA41.21, WHA42.22.
- WHA38.27 (1985) Collaboration within the United Nations system: women, health and development. Cites: WHA28.40, WHA29.43, WHA36.21. Cited by: WHA39.18, WHA45.33.
- WHA38.28 (1985) Collaboration within the United Nations system: liberation struggle in Southern Africa: assistance to the front-line States, Lesotho and Swaziland. Cited by: WHA42.18.
- WHA38.29 (1985) Collaboration within the United Nations system: emergency health, medical and social assistance to drought, famine and other disaster affected countries in Africa. Cites: WHA36.29, WHA37.29. Cited by: WHA42.16, WHA45.19, WHA46.28.

Wernli, Falcone et al. BMJ Global Health, version 21.03.2023

- WHA38.30 (1985) Prevention and control of chronic noncommunicable diseases. Cites: WHA29.49, WHA36.32. Cited by: WHA42.35.
- WHA38.31 (1985) Collaboration with nongovernmental organizations in implementing the global strategy for health for all. Cites: WHA34.36. Cited by: WHA39.22, WHA40.25, WHA41.26, WHA42.34.
- WHA38.32 (1985) Appropriation resolution for the financial period 1986-1987. Cited by: WHA39.9.
- WHA39.1 (1986) Assignment of Morocco to the Eastern Mediterranean region.
- WHA39.2 (1986) Financial report and audited financial statements for the financial period 1 January 1984 - 31 December 1985 and reports of the external auditor to the World Health Assembly.
- WHA39.3 (1986) Status of collection of assessed contributions and status of advances to the Working Capital Fund.
- WHA39.4 (1986) Review of the financial position of the organization: use of casual income to reduce adverse effects of currency fluctuations on the programme budget. Cites: WHA38.4. Cited by: WHA40.3.
- WHA39.5 (1986) Real estate fund.
- WHA39.6 (1986) Amendments to Articles 24 and 25 of the Constitution. Cites: WHA38.14.
- WHA39.7 (1986) Evaluation of the strategy for health for all by the year 2000: seventh report on the world health situation. Cites: WHA30.43, WHA34.36, WHA35.23, WHA36.35, WHA37.17. Cited by: WHA41.26, WHA42.2, WHA45.4, WHA46.17.
- WHA39.8 (1986) Additional support to national strategies for health for all in the least developed among developing countries. Cites: WHA38.16.
- WHA39.9 (1986) Amendment to the scale of assessments to be applied to the second year of the financial period 1986-1987. Cites: WHA8.5, WHA24.12, WHA26.21, WHA38.7, WHA38.32.
- WHA39.10 (1986) Health conditions of the Arab population in the occupied Arab territories, including Palestine. Cites: WHA36.27, WHA37.26, WHA38.15. Cited by: WHA40.12.
- WHA39.11 (1986) Collaboration within the United Nations system: health assistance to refugees and displaced persons in Cyprus. Cites: WHA28.47, WHA29.44, WHA30.26, WHA31.25, WHA32.18, WHA33.22, WHA34.20, WHA35.18, WHA36.22, WHA37.24, WHA38.25. Cited by: WHA40.22, WHA41.22, WHA42.23, WHA43.13, WHA44.38.
- WHA39.12 (1986) Collaboration within the United Nations system: health and medical assistance to Lebanon. Cites: WHA29.40, WHA30.27, WHA31.26, WHA32.19, WHA33.23, WHA34.21, WHA35.19, WHA36.23, WHA37.25, WHA38.26. Cited by: WHA40.21, WHA41.21, WHA42.22.
- WHA39.13 (1986) Amendment of the statute of the International Agency for Research on Cancer.
- WHA39.14 (1986) Tobacco or health. Cites: WHA31.56, WHA33.35. Cited by: WHA40.38, WHA41.25, WHA42.19, WHA43.16, WHA44.26, WHA48.11, WHA49.17.
- WHA39.15 (1986) Global strategy for health for all by the year 2000: repercussions of the world economic situation. Cites: WHA30.43, WHA32.30, WHA33.24, WHA34.36, WHA38.20.
- WHA39.16 (1986) Members in arrears in the payment of their contributions to an extent which may invoke Article 7 of the Constitution: Romania. Cites: WHA8.13.
- WHA39.17 (1986) Members in arrears in the payment of their contributions to an extent which may invoke Article 7 of the Constitution: Burkina Faso, Dominica, Dominican Republic, Equatorial Guinea, Guatemala and Guinea-Bissau.
- WHA39.18 (1986) Collaboration within the United Nations system - general matters: implementation requirements of the Nairobi Forward-Looking Strategies for the advancement of women in the health sector. Cites: WHA38.12, WHA38.27. Cited by: WHA40.27, WHA44.42, WHA46.18.
- WHA39.19 (1986) Collaboration within the United Nations system: general matters: contribution of WHO to the International Year of Peace. Cites: WHA13.56, WHA13.67, WHA15.51, WHA17.45, WHA20.54, WHA23.53, WHA32.24, WHA32.30, WHA33.24, WHA34.38, WHA36.28.
- WHA39.20 (1986) International Drinking Water Supply and Sanitation Decade. Cites: WHA36.13. Cited by: WHA42.25, WHA51.28, WHA64.24, WHA72.7.
- WHA39.21 (1986) Elimination of dracunculiasis. Cites: WHA34.25. Cited by: WHA42.29, WHA44.5, WHA50.35, WHA64.16.

Wernli, Falcone et al. BMJ Global Health, version 21.03.2023

- WHA39.22 (1986) Intersectoral cooperation in national strategies for health. Cites: WHA37.31, WHA38.31. Cited by: WHA40.30, WHA41.26, WHA42.26, WHA45.31, WHA46.27.
- WHA39.23 (1986) The impact on health of the situation of tension in Central America. Cites: WHA37.14. Cited by: WHA42.37, WHA50.27, WHA51.16, WHA52.23, WHA54.13.
- WHA39.24 (1986) Collaboration within the United Nations system: liberation struggle in Southern Africa: assistance to the front-line States, Lesotho and Swaziland. Cited by: WHA41.23, WHA42.17, WHA42.18, WHA43.14, WHA44.39.
- WHA39.25 (1986) Prevention of mental, neurological and psychosocial disorders. Cites: WHA28.84, WHA29.21, WHA30.38, WHA32.40, WHA33.27. Cited by: WHA42.20, WHA46.27, WHA55.10.
- WHA39.26 (1986) Abuse of narcotic and psychotropic substances. Cites: WHA33.27, WHA37.23. Cited by: WHA42.20, WHA43.11.
- WHA39.27 (1986) The rational use of drugs. Cites: WHA37.33. Cited by: WHA41.16, WHA41.17, WHA43.20, WHA45.27, WHA45.28, WHA47.12, WHA47.13, WHA47.17, WHA48.13, WHA49.14, WHA52.19, WHA54.11, WHA58.27, WHA60.16, WHA60.20, WHA67.25, WHA68.7.
- WHA39.28 (1986) Infant and Young Child Feeding. Cites: WHA27.43, WHA31.47, WHA33.32, WHA34.22, WHA35.26, WHA37.30. Cited by: WHA41.11, WHA43.3, WHA45.34, WHA47.5, WHA49.15, WHA54.2, WHA55.25, WHA58.32, WHA59.21, WHA61.20, WHA63.23, WHA69.9, WHA71.9.
- WHA39.29 (1986) Acquired immunodeficiency syndrome.
- WHA39.30 (1986) Expanded programme on immunization.
- WHA39.31 (1986) Prevention and control of iodine deficiency disorders. Cited by: WHA41.11, WHA43.2, WHA45.33, WHA49.13, WHA52.24.
- WHA40.1 (1987) Interim financial report for the year 1986.
- WHA40.2 (1987) Status of collection of assessed contributions and status of advances to the Working Capital Fund.
- WHA40.3 (1987) Report on casual income: use of casual income to reduce adverse effects of currency fluctuations on the programme budget for 1986-1987. Cites: WHA39.4.
- WHA40.4 (1987) Report on casual income: use of casual income to reduce adverse effects of currency fluctuations on the programme budget for 1988-1989.
- WHA40.5 (1987) Members in arrears in the payment of their contributions to an extent which may invoke Article 7 of the Constitution: Burkina Faso, Comoros, Dominican Republic, Equatorial Guinea, Ghana, Guatemala, Guinea-Bissau, Liberia, Mauritania, Peru, Saint Lucia And Sierra Leone.
- WHA40.6 (1987) Scale of assessments for the financial period 1988-1989.
- WHA40.7 (1987) Real estate fund.
- WHA40.8 (1987) Salaries for ungraded posts and for the Director-General.
- WHA40.9 (1987) Recruitment of international staff in WHO: participation of women in the work of WHO. Cites: WHA38.12. Cited by: WHA42.13.
- WHA40.10 (1987) Recruitment of international staff in WHO: geographical representativeness of the staff. Cites: WHA38.12. Cited by: WHA42.12.
- WHA40.11 (1987) Appointment of the external auditor.
- WHA40.12 (1987) Health conditions of the Arab population in the occupied Arab territories, including Palestine. Cites: WHA39.10.
- WHA40.13 (1987) Development of guiding principles for human organ transplants. Cited by: WHA57.18, WHA63.22.
- WHA40.14 (1987) Promotion of balanced health manpower development.
- WHA40.15 (1987) Management of WHO's resources.
- WHA40.16 (1987) Caribbean cooperation in health.
- WHA40.17 (1987) Implementation of the strategy for health for all by non-aligned and other developing countries. Cited by: WHA42.37, WHA50.27, WHA51.16, WHA52.23, WHA54.13.
- WHA40.18 (1987) Collaboration within the United Nations system: general matters: International Year of Shelter for the Homeless. Cited by: WHA45.31.

Wernli, Falcone et al. BMJ Global Health, version 21.03.2023

- WHA40.19 (1987) Collaboration within the United Nations system: general matters: deteriorating health situation in Somalia caused by the recurring drought.
- WHA40.20 (1987) The Codex Alimentarius Commission. Cited by: WHA56.23.
- WHA40.21 (1987) Health and medical assistance to Lebanon. Cites: WHA29.40, WHA30.27, WHA31.26, WHA32.19, WHA33.23, WHA34.21, WHA35.19, WHA36.23, WHA37.25, WHA38.26, WHA39.12. Cited by: WHA41.21, WHA42.22.
- WHA40.22 (1987) Health assistance to refugees and displaced persons in Cyprus. Cites: WHA28.47, WHA29.44, WHA30.26, WHA31.25, WHA32.18, WHA33.22, WHA34.20, WHA35.18, WHA36.22, WHA37.24, WHA38.25, WHA39.11. Cited by: WHA41.22, WHA42.23, WHA43.13, WHA44.38.
- WHA40.23 (1987) Liberation struggle in Southern Africa: assistance to the Front-Line States; Lesotho and Swaziland. Cited by: WHA41.23, WHA42.17, WHA42.18, WHA43.14, WHA44.39.
- WHA40.24 (1987) Effects of nuclear war on health and health services. Cites: WHA34.38, WHA36.28. Cited by: WHA46.40.
- WHA40.25 (1987) Collaboration with nongovernmental organizations: principles governing relations between WHO and nongovernmental organizations. Cites: WHA1.130, WHA3.113, WHA11.14, WHA21.28, WHA38.31. Cited by: WHA69.10.
- WHA40.26 (1987) Global strategy for the prevention and control of AIDS. Cited by: WHA41.24, WHA42.33, WHA42.34, WHA43.10, WHA45.35, WHA46.37, WHA49.27.
- WHA40.27 (1987) Maternal health and safe motherhood. Cites: WHA32.42, WHA38.22, WHA39.18. Cited by: WHA42.42, WHA45.33, WHA48.10.
- WHA40.28 (1987) Health of the working population. Cites: WHA32.14, WHA33.31.
- WHA40.29 (1987) Research on aging. Cites: WHA32.25, WHA35.28.
- WHA40.30 (1987) Economic support for national health for all strategies. Cites: WHA39.22. Cited by: WHA42.3, WHA42.4, WHA42.37, WHA50.27, WHA51.16, WHA52.23, WHA54.13.
- WHA40.31 (1987) Eighth general programme of work covering a specific period (1990-1995 inclusive) (Article 28(g)).
- WHA40.32 (1987) Use of alcohol in medicines.
- WHA40.33 (1987) Traditional medicine. Cites: WHA29.72, WHA30.49, WHA31.33. Cited by: WHA41.19, WHA42.43, WHA44.34, WHA56.31, WHA62.13, WHA67.18.
- WHA40.34 (1987) Diarrhoeal diseases control. Cites: WHA31.44, WHA35.22. Cited by: WHA48.12.
- WHA40.35 (1987) Towards the elimination of leprosy. Cites: WHA32.39. Cited by: WHA44.9.
- WHA40.36 (1987) Fortieth anniversary of WHO.
- WHA40.37 (1987) Appropriation resolution for the financial period 1988-1989. Cited by: WHA41.10.
- WHA40.38 (1987) 7 April 1988: a World No-smoking Day. Cites: WHA39.14.
- WHA41.1 (1988) Appointment of the Director-General.
- WHA41.2 (1988) Contract of the Director-General.
- WHA41.3 (1988) Expression of appreciation to Dr Halfdan T. Mahler.
- WHA41.4 (1988) Amendments to the rules of procedure of the World Health Assembly.
- WHA41.5 (1988) Financial report and audited financial statements for the financial period 1 January 1986 - 31 December 1987 and report of the external auditor to the World Health Assembly.
- WHA41.6 (1988) Status of collection of assessed contributions and status of advances to the Working Capital Fund.
- WHA41.7 (1988) Members in arrears in the payment of their contributions to an extent which would justify invoking Article 7 of the Constitution: statement of principles. Cites: WHA8.13, WHA16.20, WHA37.7. Cited by: WHA44.12, WHA45.8, WHA46.10, WHA47.18, WHA48.6, WHA49.4, WHA50.8, WHA51.2, WHA52.4, WHA53.2, WHA54.5, WHA54.6, WHA55.4, WHA56.10, WHA57.5, WHA58.7, WHA59.5, WHA60.4, WHA61.7, WHA62.4, WHA64.19, WHA65.11, WHA66.13, WHA67.5, WHA68.11, WHA69.13, WHA70.8, WHA71.10, WHA72.9, WHA75.10.
- WHA41.8 (1988) Health conditions of the Arab population in the occupied Arab territories, including Palestine.

Wernli, Falcone et al. BMJ Global Health, version 21.03.2023

- WHA41.9 (1988) Special programme of research, development and research training in human reproduction. Cited by: WHA48.10.
- WHA41.10 (1988) Revised appropriation resolution for the financial period 1988-1989. Cites: WHA40.37.
- WHA41.11 (1988) Infant and young child nutrition. Cites: WHA33.32, WHA34.22, WHA37.18, WHA39.28, WHA39.31. Cited by: WHA43.3, WHA45.34, WHA47.5, WHA54.2, WHA55.25, WHA58.32, WHA59.21, WHA61.20, WHA63.23, WHA69.9, WHA71.9.
- WHA41.12 (1988) Incentive scheme to promote timely payment of assessed contributions by members. Cited by: WHA42.7, WHA43.5, WHA44.11, WHA44.35, WHA45.7, WHA46.9, WHA46.34, WHA47.19, WHA48.5, WHA48.32, WHA49.3, WHA50.7, WHA50.25, WHA51.1, WHA52.1, WHA53.5, WHA54.8, WHA55.7.
- WHA41.13 (1988) Real estate fund.
- WHA41.14 (1988) Salaries and allowances for ungraded posts and the Director-General.
- WHA41.15 (1988) Collaboration within the United Nations system - general matters: report of the World Commission on Environment and Development. Cited by: WHA42.26.
- WHA41.16 (1988) Rational use of drugs. Cites: WHA37.33, WHA39.27. Cited by: WHA43.20, WHA45.27, WHA45.28, WHA45.29, WHA47.12, WHA47.13, WHA47.17, WHA49.14, WHA52.19, WHA54.11, WHA60.16, WHA60.20.
- WHA41.17 (1988) Ethical criteria for medicinal drug promotion. Cites: WHA21.41, WHA39.27. Cited by: WHA43.20, WHA45.27, WHA45.30, WHA47.16, WHA51.9, WHA60.16, WHA60.20.
- WHA41.18 (1988) WHO Certification Scheme on the Quality of Pharmaceutical Products Moving in International Commerce. Cited by: WHA43.20, WHA45.27.
- WHA41.19 (1988) Traditional medicine and medicinal plants. Cites: WHA31.33, WHA40.33. Cited by: WHA42.43, WHA44.34, WHA56.31, WHA62.13, WHA67.18.
- WHA41.20 (1988) Members in arrears in the payment of their contributions to an extent which would justify invoking Article 7 of the Constitution. Cited by: WHA43.21.
- WHA41.21 (1988) Health and medical assistance to Lebanon. Cites: WHA29.40, WHA30.27, WHA31.26, WHA32.19, WHA33.23, WHA34.21, WHA35.19, WHA36.23, WHA37.25, WHA38.26, WHA39.12, WHA40.21. Cited by: WHA42.22.
- WHA41.22 (1988) Health assistance to refugees and displaced persons in Cyprus. Cites: WHA28.47, WHA29.44, WHA30.26, WHA31.25, WHA32.18, WHA33.22, WHA34.20, WHA35.18, WHA36.22, WHA37.24, WHA38.25, WHA39.11, WHA40.22. Cited by: WHA42.23, WHA43.13, WHA44.38.
- WHA41.23 (1988) Liberation struggle in Southern Africa: assistance to the Front-Line States, Lesotho and Swaziland. Cites: WHA39.24, WHA40.23. Cited by: WHA42.17, WHA42.18, WHA43.14, WHA44.39.
- WHA41.24 (1988) AIDS: avoidance of discrimination in relation to HIV-infected people and people with AIDS. Cites: WHA40.26. Cited by: WHA42.33, WHA42.34, WHA43.10, WHA45.35, WHA46.37, WHA49.27.
- WHA41.25 (1988) Action programme on tobacco or health. Cites: WHA31.56, WHA33.35, WHA39.14. Cited by: WHA42.19, WHA43.16, WHA44.26.
- WHA41.26 (1988) Leadership Development for Health for All. Cites: WHA30.43, WHA34.36, WHA37.31, WHA38.31, WHA39.7, WHA39.22.
- WHA41.27 (1988) The role of epidemiology in attaining health for all. Cited by: WHA42.2.
- WHA41.28 (1988) Global eradication of poliomyelitis by the year 2000. Cites: WHA30.53. Cited by: WHA42.32, WHA45.17, WHA46.33.
- WHA41.29 (1988) Radionuclides in food: WHO guidelines for derived intervention levels.
- WHA41.30 (1988) Implementation of technical cooperation among non-aligned and other developing countries.
- WHA41.31 (1988) The embargo of medical supplies and its effect on health care. Cited by: WHA42.24.
- WHA41.32 (1988) Difficult health situation experienced by the people of Panama.
- WHA41.33 (1988) Health assistance to the people Afghanistan. Cited by: WHA47.28.
- WHA41.34 (1988) Strengthening primary health care. Cites: WHA30.43, WHA32.30, WHA34.36. Cited by: WHA42.2.



Wernli, Falcone et al. BMJ Global Health, version 21.03.2023

- WHA42.1 (1989) Request of Palestine for admission as a member of the World Health Organization. Cited by: WHA43.1.
- WHA42.2 (1989) Second report on monitoring progress in implementing strategies for health for all. Cites: WHA30.43, WHA32.30, WHA34.36, WHA35.23, WHA39.7, WHA41.27, WHA41.34. Cited by: WHA45.4, WHA46.17.
- WHA42.3 (1989) Strengthening technical and economic support to countries facing serious economic constraints. Cites: WHA40.30. Cited by: WHA43.17, WHA44.24, WHA48.3.
- WHA42.4 (1989) Strengthening support to countries in rationalizing the financing of health care services. Cites: WHA40.30. Cited by: WHA43.17, WHA44.24.
- WHA42.5 (1989) Preventing the purchase and sale of human organs. Cited by: WHA57.18, WHA63.22.
- WHA42.6 (1989) Interim financial report for the year 1988.
- WHA42.7 (1989) Status of collection of assessed contributions and status of advances to the Working Capital Fund. Cites: WHA41.12.
- WHA42.8 (1989) Report on casual income. Cited by: WHA44.13.
- WHA42.9 (1989) Scale of assessments for the financial period 1990-1991.
- WHA42.10 (1989) Real estate fund.
- WHA42.11 (1989) Special account for Headquarters extension and repayment of the Swiss loan.
- WHA42.12 (1989) Recruitment of international staff in WHO: geographical representativeness of the staff. Cites: WHA40.10. Cited by: WHA44.23.
- WHA42.13 (1989) Recruitment of international staff in WHO: participation of women in the work of WHO. Cites: WHA38.12, WHA40.9. Cited by: WHA45.25.
- WHA42.14 (1989) Health conditions of the Arab population in the occupied Arab territories, including Palestine. Cited by: WHA43.1, WHA43.26, WHA44.31, WHA45.26, WHA46.26.
- WHA42.15 (1989) Collaboration within the United Nations system - general matters: damage caused by torrential rain and flooding in Democratic Yemen and Djibouti.
- WHA42.16 (1989) Collaboration within the United Nations system - general matters: fostering the goals and objectives of the International Decade for Natural Disaster Reduction in the health sector. Cites: WHA34.26, WHA38.29. Cited by: WHA44.41, WHA46.6, WHA46.28, WHA48.2, WHA52.12.
- WHA42.17 (1989) Liberation struggle in Southern Africa: assistance to the Front-Line States, Lesotho and Swaziland. Cites: WHA39.24, WHA40.23, WHA41.23. Cited by: WHA44.39.
- WHA42.18 (1989) Reconstruction and development of the health system of Namibia. Cites: WHA28.78, WHA29.23, WHA30.24, WHA31.52, WHA32.20, WHA32.21, WHA33.33, WHA34.31, WHA35.20, WHA36.24, WHA37.28, WHA38.28, WHA39.24, WHA40.23, WHA41.23. Cited by: WHA43.15.
- WHA42.19 (1989) Tobacco or health. Cites: WHA39.14, WHA41.25. Cited by: WHA43.16, WHA44.26, WHA45.20, WHA46.8.
- WHA42.20 (1989) Prevention and control of drug and alcohol abuse. Cites: WHA28.84, WHA33.27, WHA36.12, WHA39.25, WHA39.26. Cited by: WHA43.11, WHA46.27, WHA58.26, WHA61.4.
- WHA42.21 (1989) Agreement with the United Nations Industrial Development Organization (UNIDO).
- WHA42.22 (1989) Health and medical assistance to Lebanon. Cites: WHA29.40, WHA30.27, WHA31.26, WHA32.19, WHA33.23, WHA34.21, WHA35.19, WHA36.23, WHA37.25, WHA38.26, WHA39.12, WHA40.21, WHA41.21. Cited by: WHA43.12.
- WHA42.23 (1989) Health assistance to refugees and displaced persons in Cyprus. Cites: WHA28.47, WHA29.44, WHA30.26, WHA31.25, WHA32.18, WHA33.22, WHA34.20, WHA35.18, WHA36.22, WHA37.24, WHA38.25, WHA39.11, WHA40.22, WHA41.22. Cited by: WHA43.13, WHA44.38.
- WHA42.24 (1989) The embargo of medical supplies and its effects on health care. Cites: WHA41.31.
- WHA42.25 (1989) International Drinking Water Supply and Sanitation Decade. Cites: WHA39.20. Cited by: WHA44.28, WHA45.31, WHA51.28, WHA64.24, WHA72.7.
- WHA42.26 (1989) WHO's contribution to the international efforts towards sustainable development. Cites: WHA34.36, WHA35.17, WHA39.22, WHA41.15. Cited by: WHA44.28, WHA45.31, WHA46.20, WHA46.40, WHA56.22.



Wernli, Falcone et al. BMJ Global Health, version 21.03.2023

- WHA42.27 (1989) Strengthening nursing and midwifery in support of strategies for health for all. Cites: WHA36.11. Cited by: WHA45.5, WHA49.1, WHA54.12, WHA59.27, WHA64.7, WHA74.15.
- WHA42.28 (1989) Disability prevention and rehabilitation. Cites: WHA28.54, WHA37.18, WHA38.18, WHA38.19. Cited by: WHA45.10, WHA48.9.
- WHA42.29 (1989) Elimination of dracunculiasis. Cites: WHA39.21. Cited by: WHA44.5, WHA50.35, WHA64.16.
- WHA42.30 (1989) Malaria control. Cited by: WHA46.32, WHA49.11.
- WHA42.31 (1989) Control of disease vectors and pests. Cites: WHA35.17, WHA38.24.
- WHA42.32 (1989) Expanded programme on immunization. Cites: WHA41.28. Cited by: WHA45.17, WHA46.33.
- WHA42.33 (1989) Global strategy for the prevention and control of AIDS. Cites: WHA40.26, WHA41.24. Cited by: WHA43.10, WHA45.35, WHA46.37, WHA49.27.
- WHA42.34 (1989) Nongovernmental organizations and the global AIDS strategy. Cites: WHA38.31, WHA40.26, WHA41.24. Cited by: WHA45.35, WHA46.37, WHA49.27.
- WHA42.35 (1989) Prevention and control of cardiovascular diseases and other chronic noncommunicable diseases. Cites: WHA30.32, WHA38.30.
- WHA42.36 (1989) Prevention and control of diabetes mellitus.
- WHA42.37 (1989) Encouragement of technical cooperation among developing countries (TCDC) through the promotion of national centres for research and the training of specialists. Cites: WHA31.41, WHA31.51, WHA32.27, WHA35.24, WHA36.34, WHA37.15, WHA37.16, WHA38.23, WHA39.23, WHA40.17, WHA40.30. Cited by: WHA46.17, WHA50.27.
- WHA42.38 (1989) Edinburgh declaration on the reform of medical education.
- WHA42.39 (1989) Oral health. Cites: WHA22.30, WHA28.64, WHA31.50, WHA36.14. Cited by: WHA60.17.
- WHA42.40 (1989) Prevention and control of salmonellosis.
- WHA42.41 (1989) The health of youth. Cites: WHA27.28, WHA29.55, WHA31.57, WHA32.40, WHA33.35, WHA37.23, WHA38.22. Cited by: WHA46.27, WHA51.22, WHA64.28.
- WHA42.42 (1989) Women's health. Cites: WHA28.40, WHA29.43, WHA31.37, WHA36.21, WHA40.27. Cited by: WHA43.10, WHA44.42, WHA46.27, WHA48.10.
- WHA42.43 (1989) Traditional medicine and modern health care. Cites: WHA29.72, WHA30.49, WHA31.33, WHA40.33, WHA41.19. Cited by: WHA44.34, WHA56.31, WHA62.13, WHA67.18.
- WHA42.44 (1989) Health promotion, public information and education for health. Cites: WHA27.27, WHA27.28, WHA31.42. Cited by: WHA51.12, WHA57.16, WHA60.24, WHA67.12.
- WHA42.45 (1989) Revised appropriation resolution for the financial period 1990-1991.
- WHA43.1 (1990) Request of Palestine for admission as a member of the World Health Organization. Cites: WHA42.1, WHA42.14.
- WHA43.2 (1990) Prevention and control of iodine deficiency disorders. Cites: WHA39.31. Cited by: WHA45.33, WHA49.13, WHA52.24.
- WHA43.3 (1990) Protecting, promoting and supporting breast-feeding. Cites: WHA33.32, WHA34.22, WHA35.26, WHA37.30, WHA39.28, WHA41.11. Cited by: WHA45.34, WHA47.5, WHA54.2, WHA55.25, WHA59.21, WHA61.20, WHA63.23, WHA69.9, WHA71.9.
- WHA43.4 (1990) Financial report and audited financial statements for the financial period 1 January 1988 - 31 December 1989 and report of the external auditor to the World Health Assembly.
- WHA43.5 (1990) Status of collection of assessed contributions and status of advances to the Working Capital Fund. Cites: WHA41.12.
- WHA43.6 (1990) Real estate fund.
- WHA43.7 (1990) Salaries and allowances for ungraded posts and the Director-General.
- WHA43.8 (1990) Andean cooperation in health.
- WHA43.9 (1990) Improving technical cooperation among developing countries through implementation of the medium-term programme on TCDC for health for all 1990-1995. Cited by: WHA46.17, WHA50.27.

Wernli, Falcone et al. BMJ Global Health, version 21.03.2023

- WHA43.10 (1990) Women, children and AIDS. Cites: WHA40.26, WHA41.24, WHA42.33, WHA42.42. Cited by: WHA45.35, WHA46.37, WHA48.10, WHA49.27.
- WHA43.11 (1990) Reduction in demand for illicit drugs. Cites: WHA39.26, WHA42.20.
- WHA43.12 (1990) Health and medical assistance to Lebanon. Cites: WHA42.22. Cited by: WHA44.37.
- WHA43.13 (1990) Health assistance to refugees and displaced persons in Cyprus. Cites: WHA28.47, WHA29.44, WHA30.26, WHA31.25, WHA32.18, WHA33.22, WHA34.20, WHA35.18, WHA36.22, WHA37.24, WHA38.25, WHA39.11, WHA40.22, WHA41.22, WHA42.23. Cited by: WHA44.38.
- WHA43.14 (1990) Liberation struggle in Southern Africa: assistance to the Front-Line States, Lesotho and Swaziland. Cites: WHA39.24, WHA40.23, WHA41.23. Cited by: WHA44.39.
- WHA43.15 (1990) Reconstruction and development of the health sector in Namibia. Cites: WHA42.18. Cited by: WHA44.40.
- WHA43.16 (1990) Tobacco or health. Cites: WHA33.35, WHA39.14, WHA41.25, WHA42.19. Cited by: WHA44.26, WHA45.20, WHA46.8, WHA48.11, WHA49.17.
- WHA43.17 (1990) Strengthening technical and economic support to countries facing serious economic constraints. Cites: WHA42.3, WHA42.4. Cited by: WHA44.24, WHA46.30, WHA46.32, WHA48.3.
- WHA43.18 (1990) Tropical disease research. Cites: WHA30.42.
- WHA43.19 (1990) The role of health research.
- WHA43.20 (1990) Action programme on essential drugs. Cites: WHA37.32, WHA37.33, WHA39.27, WHA41.16, WHA41.17, WHA41.18. Cited by: WHA45.27, WHA45.30, WHA47.13, WHA47.16, WHA49.14, WHA52.19, WHA54.11, WHA60.16, WHA60.20.
- WHA43.21 (1990) Members in arrears in the payment of their contributions to an extent which would justify invoking Article 7 of the Constitution. Cites: WHA41.20.
- WHA43.22 (1990) Assessment of Namibia. Cites: WHA8.5, WHA24.12, WHA26.21, WHA30.29.
- WHA43.23 (1990) Amendment to the statute of the International Agency for Research on Cancer.
- WHA43.24 (1990) Report of the International Conference for the Tenth Revision of the International Classification of Diseases. Cited by: WHA72.15.
- WHA43.25 (1990) Hazardous wastes management.
- WHA43.26 (1990) Health conditions of the Arab population in the occupied Arab territories, including Palestine. Cites: WHA42.14. Cited by: WHA44.31, WHA45.26, WHA46.26.
- WHA44.1 (1991) Admission of new members and associate members.
- WHA44.2 (1991) Admission of new members and associate members.
- WHA44.3 (1991) Admission of new members and associate members.
- WHA44.4 (1991) Research and development in the field of children's vaccines.
- WHA44.5 (1991) Eradication of dracunculiasis. Cites: WHA39.21, WHA42.29. Cited by: WHA50.35, WHA64.16.
- WHA44.6 (1991) Cholera. Cites: WHA24.26. Cited by: WHA64.15.
- WHA44.7 (1991) Control of acute respiratory infections. Cited by: WHA48.12.
- WHA44.8 (1991) Tuberculosis control programme. Cites: WHA36.30. Cited by: WHA46.36, WHA48.13, WHA50.21, WHA51.13, WHA53.1.
- WHA44.9 (1991) Leprosy. Cites: WHA40.35. Cited by: WHA51.15.
- WHA44.10 (1991) Interim financial report on the accounts of WHO for 1990 and comments thereon of the Committee of the Executive Board to consider certain financial matters prior to the Health Assembly (Article 18(f); Financial Regulations 11.3 and 12.9).
- WHA44.11 (1991) Status of collection of assessed contributions and status of advances to the Working Capital Fund. Cites: WHA41.12.
- WHA44.12 (1991) Members in arrears in the payment of their contributions to an extent which would justify invoking Article 7 of the Constitution. Cites: WHA41.7. Cited by: WHA45.8, WHA51.3.
- WHA44.13 (1991) Report on casual income. Cites: WHA42.8.
- WHA44.14 (1991) Report on casual income.
- WHA44.15 (1991) Salaries and ungraded posts and of the Director-General.
- WHA44.16 (1991) Amendments to the financial regulations and rules.

Wernli, Falcone et al. BMJ Global Health, version 21.03.2023

- WHA44.17 (1991) External auditor appointment.
- WHA44.18 (1991) Assessment of new members and associate members: assessment of Belize. Cites: WHA8.5, WHA24.12, WHA26.21.
- WHA44.19 (1991) Assessment of new members and associate members: assessment of Tokelau. Cites: WHA22.6, WHA27.9.
- WHA44.20 (1991) Assessment of new members and associate members: assessment of Marshall Islands. Cites: WHA22.6.
- WHA44.21 (1991) Assessment of new members and associate members: assessment of the Federated States of Micronesia. Cites: WHA22.6.
- WHA44.22 (1991) Scale of assessments for the financial period 1992-1993. Cited by: WHA45.15.
- WHA44.23 (1991) Recruitment of international staff in WHO: biennial report. Cites: WHA42.12. Cited by: WHA46.23.
- WHA44.24 (1991) Health promotion for the development of the least developed countries. Cites: WHA42.3, WHA42.4, WHA43.17. Cited by: WHA46.30.
- WHA44.25 (1991) Human organ transplantation. Cited by: WHA57.18, WHA63.22.
- WHA44.26 (1991) Smoking and travel. Cites: WHA33.35, WHA39.14, WHA41.25, WHA42.19, WHA43.16.
- WHA44.27 (1991) Urban health development. Cited by: WHA45.31, WHA51.28.
- WHA44.28 (1991) Water and environmental sanitation. Cites: WHA42.25, WHA42.26. Cited by: WHA45.31, WHA51.28, WHA64.24, WHA72.7.
- WHA44.29 (1991) Real estate fund.
- WHA44.30 (1991) Method of work of the Health Assembly. Cites: WHA32.36, WHA37.21. Cited by: WHA46.11, WHA47.14.
- WHA44.31 (1991) Health conditions of the Arab population in the occupied Arab territories, including Palestine. Cites: WHA42.14, WHA43.26. Cited by: WHA45.26, WHA46.26.
- WHA44.32 (1991) Collaboration within the United Nations system: health situation of the displaced persons in Iraq and the neighbouring countries.
- WHA44.33 (1991) Collaboration within the United Nations system: world summit for children: follow-up action. Cited by: WHA45.17, WHA45.33, WHA46.33, WHA55.25, WHA59.21.
- WHA44.34 (1991) Traditional medicine and modern health care. Cites: WHA22.54, WHA29.72, WHA30.49, WHA40.33, WHA41.19, WHA42.43. Cited by: WHA67.18.
- WHA44.35 (1991) Appropriation resolution for the financial period 1992-1993. Cites: WHA41.12. Cited by: WHA45.15.
- WHA44.36 (1991) International programme to mitigate the health effects of the Chernobyl accident. Cited by: WHA49.22.
- WHA44.37 (1991) Health and medical assistance to Lebanon. Cites: WHA43.12. Cited by: WHA45.21, WHA47.28, WHA48.31, WHA49.28.
- WHA44.38 (1991) Health assistance to refugees and displaced persons in Cyprus. Cites: WHA28.47, WHA29.44, WHA30.26, WHA31.25, WHA32.18, WHA33.22, WHA34.20, WHA35.18, WHA36.22, WHA37.24, WHA38.25, WHA39.11, WHA40.22, WHA41.22, WHA42.23, WHA43.13. Cited by: WHA45.21, WHA47.28, WHA48.31, WHA49.28.
- WHA44.39 (1991) Liberation struggle in Southern Africa: assistance to the Front-Line States, Lesotho and Swaziland. Cites: WHA39.24, WHA40.23, WHA41.23, WHA42.17, WHA43.14. Cited by: WHA45.21, WHA47.28, WHA48.31, WHA49.28.
- WHA44.40 (1991) Reconstruction and development of the health sector in Namibia. Cites: WHA43.15. Cited by: WHA45.21, WHA47.28, WHA48.31, WHA49.28.
- WHA44.41 (1991) Emergency relief operations. Cites: WHA42.16. Cited by: WHA46.6, WHA46.28, WHA48.2, WHA48.31.
- WHA44.42 (1991) Women, health, and development. Cites: WHA39.18, WHA42.42. Cited by: WHA45.25.

Wernli, Falcone et al. BMJ Global Health, version 21.03.2023

- WHA44.43 (1991) Collaboration within the United Nations system: health and medical assistance to Somalia. Cited by: WHA45.21, WHA47.28, WHA48.31, WHA49.28.
- WHA45.1 (1992) Admission of new members and associate members.
- WHA45.2 (1992) Admission of new members and associate members.
- WHA45.3 (1992) Admission of new members and associate members.
- WHA45.4 (1992) Implementation of the global strategy for health for all by the year 2000, second evaluation; and eighth report on the world health situation. Cites: WHA30.43, WHA34.36, WHA39.7, WHA42.2. Cited by: WHA46.17.
- WHA45.5 (1992) Strengthening nursing and midwifery in support of strategies for health for all. Cites: WHA42.27. Cited by: WHA46.17, WHA47.9, WHA49.1, WHA54.12, WHA59.27, WHA64.7, WHA74.15.
- WHA45.6 (1992) Financial report on the accounts of WHO for the financial period 1990-1991, report of the external auditor, and comments thereon of the Committee of the Executive Board to consider certain financial matters prior to the Health Assembly (Article 18(f); Financial Regulations 11.3 and 12.9).
- WHA45.7 (1992) Status of collection of assessed contributions and status of advances to the Working Capital Fund. Cites: WHA41.12.
- WHA45.8 (1992) Members in arrears in the payment of their contributions to an extent which would justify invoking Article 7 of the Constitution. Cites: WHA41.7, WHA44.12. Cited by: WHA46.10, WHA51.3.
- WHA45.9 (1992) Real estate fund.
- WHA45.10 (1992) Disability prevention and rehabilitation. Cites: WHA28.54, WHA29.68, WHA38.18, WHA38.19, WHA42.28. Cited by: WHA51.11, WHA56.26.
- WHA45.11 (1992) Assessment of new members and associate members: assessments of Latvia and Lithuania. Cites: WHA8.5, WHA24.12, WHA26.21.
- WHA45.12 (1992) Assessment of new members and associate members: assessment of Puerto Rico. Cites: WHA22.6, WHA27.9.
- WHA45.13 (1992) Assessment of new members and associate members: assessments of Armenia, Georgia, Kyrgyzstan, Moldova and Tajikistan. Cites: WHA8.5, WHA24.12, WHA26.21.
- WHA45.14 (1992) Assessment of new members and associate members: assessment of Slovenia. Cites: WHA8.5, WHA24.12, WHA26.21. Cited by: WHA45.15.
- WHA45.15 (1992) Scale of assessments for the second year of the financial period 1992-1993. Cites: WHA8.5, WHA24.12, WHA26.21, WHA44.22, WHA44.35, WHA45.14. Cited by: WHA46.12.
- WHA45.16 (1992) Salaries and allowances for ungraded posts and the Director-General.
- WHA45.17 (1992) Immunization and vaccine quality. Cites: WHA35.31, WHA41.28, WHA42.32, WHA44.33. Cited by: WHA46.33, WHA63.18, WHA67.6, WHA67.20, WHA70.7.
- WHA45.18 (1992) Collaboration within the United Nations system: general matters.
- WHA45.19 (1992) Support to drought-stricken countries of Southern Africa. Cites: WHA36.29, WHA37.29, WHA38.29.
- WHA45.20 (1992) Collaboration within the United Nations system: general matters: multisectoral collaboration on WHO's programme on tobacco or health. Cites: WHA42.19, WHA43.16. Cited by: WHA46.8, WHA48.11, WHA49.17.
- WHA45.21 (1992) Collaboration within the United Nations system: health assistance to specific countries. Cites: WHA35.1, WHA44.37, WHA44.38, WHA44.39, WHA44.40, WHA44.43. Cited by: WHA46.29.
- WHA45.22 (1992) Child health and development: health of the newborn. Cites: WHA31.55, WHA32.42. Cited by: WHA46.18, WHA51.22.
- WHA45.23 (1992) Arrears of contributions payable by formerly inactive members Belarus and Ukraine. Cites: WHA9.9. Cited by: WHA57.6.
- WHA45.24 (1992) Collaboration within the United Nations system: general matters: health and development. Cited by: WHA47.27, WHA48.16, WHA50.23.
- WHA45.25 (1992) Collaboration within the United Nations system: general matters: women, health and development. Cites: WHA42.13, WHA44.42. Cited by: WHA46.18.

Wernli, Falcone et al. BMJ Global Health, version 21.03.2023

- WHA45.26 (1992) Health conditions of the Arab population in the occupied Arab territories, including Palestine. Cites: WHA42.14, WHA43.26, WHA44.31. Cited by: WHA46.26.
- WHA45.27 (1992) WHO action programme on essential drugs. Cites: WHA37.27, WHA37.32, WHA39.27, WHA41.16, WHA41.17, WHA41.18, WHA43.20. Cited by: WHA47.13, WHA49.14, WHA52.19, WHA54.11, WHA60.16, WHA60.20.
- WHA45.28 (1992) Harmonizing drug regulations. Cites: WHA26.30, WHA28.65, WHA37.33, WHA39.27, WHA41.16.
- WHA45.29 (1992) Proposed guidelines on the WHO Certification Scheme on the Quality of Pharmaceutical Products Moving in International Commerce. Cites: WHA41.16. Cited by: WHA50.3.
- WHA45.30 (1992) WHO ethical criteria for medicinal drug promotion. Cites: WHA41.17, WHA43.20. Cited by: WHA47.16, WHA51.9, WHA60.16.
- WHA45.31 (1992) Health and Environment. Cites: WHA39.22, WHA40.18, WHA42.25, WHA42.26, WHA44.27, WHA44.28. Cited by: WHA46.20, WHA46.40, WHA51.28, WHA64.24, WHA72.7.
- WHA45.32 (1992) International Programme on Chemical Safety. Cites: WHA30.47, WHA31.28. Cited by: WHA46.20, WHA50.13, WHA55.16, WHA56.22, WHA63.25.
- WHA45.33 (1992) National strategies for overcoming micronutrient malnutrition. Cites: WHA22.29, WHA25.55, WHA28.54, WHA37.18, WHA38.27, WHA39.31, WHA40.27, WHA43.2, WHA44.33.
- WHA45.34 (1992) Infant and young child nutrition (progress and evaluation report; and status of implementation of the International Code of Marketing of Breast-milk Substitutes). Cites: WHA33.32, WHA34.22, WHA35.26, WHA37.30, WHA39.28, WHA41.11, WHA43.3. Cited by: WHA47.5, WHA49.15, WHA54.2, WHA55.25, WHA61.20, WHA63.23, WHA69.9, WHA71.9.
- WHA45.35 (1992) Global strategy for the prevention and control of AIDS. Cites: WHA40.26, WHA41.24, WHA42.33, WHA42.34, WHA43.10. Cited by: WHA46.37, WHA48.13, WHA49.27.
- WHA46.1 (1993) Participation of the Federal Republic of Yugoslavia (Serbia and Montenegro) in the principal and subsidiary organs of WHO.
- WHA46.2 (1993) Appointment of the Director-General.
- WHA46.3 (1993) Contract of the Director-General.
- WHA46.4 (1993) Admission of new members and associate members.
- WHA46.5 (1993) Interim financial report on the accounts of WHO for 1992 and comments thereon of the Committee of the Executive Board to consider certain financial matters prior to the Health Assembly (Article 18(f); Financial Regulations 11.3 and 12.9).
- WHA46.6 (1993) Emergency and humanitarian relief operations. Cites: WHA28.45, WHA34.26, WHA42.16, WHA44.41. Cited by: WHA48.2, WHA48.13, WHA65.20.
- WHA46.7 (1993) International Conference on Nutrition: follow-up action. Cited by: WHA47.5, WHA54.2, WHA55.25, WHA57.17, WHA58.32, WHA63.23, WHA69.9, WHA71.9.
- WHA46.8 (1993) Use of tobacco within United Nations system buildings. Cites: WHA42.19, WHA43.16, WHA45.20.
- WHA46.9 (1993) Status of collection of assessed contributions and status of advances to the Working Capital Fund. Cites: WHA41.12.
- WHA46.10 (1993) Members in arrears in the payment of their contributions to an extent which would justify invoking Article 7 of the Constitution. Cites: WHA41.7, WHA45.8. Cited by: WHA47.18, WHA51.3.
- WHA46.11 (1993) Method of work of the Health Assembly. Cites: WHA31.13, WHA36.16, WHA44.30.
- WHA46.12 (1993) Assessment of the Czech Republic and the Slovak Republic. Cites: WHA8.5, WHA24.12, WHA26.21, WHA45.15.
- WHA46.13 (1993) Assessment of new members and associate members: assessment of the former Yugoslav Republic of Macedonia. Cites: WHA22.6.
- WHA46.14 (1993) Assessment of new members and associate members: assessment of Tuvalu. Cites: WHA22.6.
- WHA46.15 (1993) Scale of assessments for the financial period 1994-1995. Cited by: WHA47.21.
- WHA46.16 (1993) WHO response to global change. Cited by: WHA47.6.

Wernli, Falcone et al. BMJ Global Health, version 21.03.2023

- WHA46.17 (1993) Health development in a changing world - a call for collective action. Cites: WHA30.43, WHA34.36, WHA39.7, WHA42.2, WHA42.37, WHA43.9, WHA45.4, WHA45.5. Cited by: WHA50.27.
- WHA46.18 (1993) Maternal and child health and family planning for health. Cites: WHA32.42, WHA38.22, WHA39.18, WHA45.22, WHA45.25. Cited by: WHA47.9, WHA47.10.
- WHA46.19 (1993) Nonproprietary names for pharmaceutical substances. Cites: WHA31.32.
- WHA46.20 (1993) WHO global strategy for health and environment. Cites: WHA42.26, WHA45.31, WHA45.32. Cited by: WHA50.13, WHA51.28, WHA51.29.
- WHA46.21 (1993) Special report of the external auditor. Cited by: WHA47.6.
- WHA46.22 (1993) Real estate fund.
- WHA46.23 (1993) Recruitment of international staff in WHO: geographical representation. Cites: WHA44.23. Cited by: WHA48.28.
- WHA46.24 (1993) Recruitment of international staff in WHO: employment and participation of women. Cites: WHA38.12.
- WHA46.25 (1993) Salaries for ungraded posts and the Director-General.
- WHA46.26 (1993) Health conditions of the Arab population in the occupied Arab territories, including Palestine. Cites: WHA42.14, WHA43.26, WHA44.31, WHA45.26. Cited by: WHA46.31.
- WHA46.27 (1993) Collaboration within the United Nations system: International Year of the Family (1994). Cites: WHA38.22, WHA39.22, WHA39.25, WHA42.20, WHA42.41, WHA42.42. Cited by: WHA55.25, WHA57.11.
- WHA46.28 (1993) Health assistance to specific countries. Cites: WHA34.26, WHA38.29, WHA42.16, WHA44.41.
- WHA46.29 (1993) Collaboration within the United Nations system: health assistance to specific countries. Cites: WHA35.1, WHA45.21. Cited by: WHA47.28.
- WHA46.30 (1993) Increased support under the programme of intensified cooperation with countries in greatest need, in particular for the African countries. Cites: WHA43.17, WHA44.24. Cited by: WHA48.3.
- WHA46.31 (1993) Dengue prevention and control. Cites: WHA46.26. Cited by: WHA48.13, WHA55.17.
- WHA46.32 (1993) Control of malaria. Cites: WHA42.30, WHA43.17. Cited by: WHA48.13, WHA49.11, WHA50.34.
- WHA46.33 (1993) Eradication of poliomyelitis. Cites: WHA41.28, WHA42.32, WHA44.33, WHA45.17.
- WHA46.34 (1993) Appropriation resolution for the financial period 1994-1995. Cites: WHA41.12.
- WHA46.35 (1993) Budgetary reform. Cited by: WHA47.7, WHA47.8, WHA48.25.
- WHA46.36 (1993) Tuberculosis programme. Cites: WHA44.8. Cited by: WHA48.13, WHA50.21, WHA51.13, WHA53.1.
- WHA46.37 (1993) Study of a United Nations programme on HIV/AIDS. Cites: WHA40.26, WHA41.24, WHA42.33, WHA42.34, WHA43.10, WHA45.35. Cited by: WHA59.19.
- WHA46.38 (1993) Meritorious within-grade increases.
- WHA46.39 (1993) Health and medical services in times of armed conflict. Cites: WHA30.32. Cited by: WHA48.2, WHA55.13, WHA65.20.
- WHA46.40 (1993) Health and environmental effects of nuclear weapons. Cites: WHA34.38, WHA36.28, WHA40.24, WHA42.26, WHA45.31.
- WHA47.1 (1994) Rights and privileges of South Africa. Cites: WHA17.50. Cited by: WHA49.5.
- WHA47.2 (1994) Admission of new members and associate members.
- WHA47.3 (1994) Admission of new members and associate members.
- WHA47.4 (1994) Ninth general programme of work (covering the period 1996-2001).
- WHA47.5 (1994) Infant and young child nutrition. Cites: WHA33.32, WHA34.22, WHA35.26, WHA37.30, WHA39.28, WHA41.11, WHA43.3, WHA45.34, WHA46.7. Cited by: WHA49.15, WHA54.2, WHA55.25, WHA58.32, WHA59.21, WHA61.20, WHA63.23, WHA69.9, WHA71.9.
- WHA47.6 (1994) WHO response to global change: Programme Development Committee. Cites: WHA46.16, WHA46.21. Cited by: WHA48.15.



Wernli, Falcone et al. BMJ Global Health, version 21.03.2023

- WHA47.7 (1994) Budgetary reform: Administration, Budget and Finance Committee. Cites: WHA46.35.
- WHA47.8 (1994) Budgetary reform. Cites: WHA46.35. Cited by: WHA48.25.
- WHA47.9 (1994) Maternal and child health and family planning: quality of care. Cites: WHA32.30, WHA32.42, WHA45.5, WHA46.18. Cited by: WHA48.10, WHA49.1, WHA54.12, WHA64.7.
- WHA47.10 (1994) Maternal and child health and family planning: traditional practices harmful to the health of women and children. Cites: WHA32.42, WHA38.22, WHA46.18. Cited by: WHA61.16.
- WHA47.11 (1994) Implementation of WHO's revised drug strategy: revision and amendment of WHO's good manufacturing practices for pharmaceutical products. Cites: WHA20.34, WHA22.50, WHA28.65.
- WHA47.12 (1994) Role of the pharmacist in support of the WHO revised drug strategy. Cites: WHA37.33, WHA39.27, WHA41.16. Cited by: WHA49.14, WHA52.19, WHA54.11, WHA60.16, WHA60.20.
- WHA47.13 (1994) Implementation of WHO's revised drug strategy: rational use of drugs; and WHO'S Action Programme on Essential Drugs. Cites: WHA39.27, WHA41.16, WHA43.20, WHA45.27. Cited by: WHA49.14, WHA52.19, WHA58.27, WHA60.16, WHA60.20, WHA67.25, WHA68.7.
- WHA47.14 (1994) WHO response to global change: Health Assembly resolutions. Cites: WHA31.9, WHA44.30.
- WHA47.15 (1994) Financial report and audited financial statements for the financial period 1 January 1992 - 31 December 1993 and report of the external auditor to the World Health Assembly.
- WHA47.16 (1994) WHO ethical criteria for medicinal drug promotion. Cites: WHA41.17, WHA43.20, WHA45.30. Cited by: WHA49.14, WHA51.9, WHA52.19, WHA54.11, WHA60.16.
- WHA47.17 (1994) Implementation of WHO's revised drug strategy: safety, efficacy and quality of pharmaceuticals. Cites: WHA37.33, WHA39.27, WHA41.16. Cited by: WHA49.14, WHA52.19, WHA54.11, WHA67.20.
- WHA47.18 (1994) Consideration of the situation of certain Member States falling under the purview of Article 7 of the Constitution. Cites: WHA41.7, WHA46.10. Cited by: WHA48.6, WHA51.3.
- WHA47.19 (1994) Status of collection of assessed contributions and status of advances to the Working Capital Fund. Cites: WHA41.12.
- WHA47.20 (1994) Review of the working capital fund.
- WHA47.21 (1994) Assessment of the Czech Republic and Slovakia. Cites: WHA24.12, WHA26.21, WHA46.15.
- WHA47.22 (1994) Assessment of Eritrea. Cites: WHA8.5, WHA24.12, WHA26.21.
- WHA47.23 (1994) Assessment of Niue. Cites: WHA22.6.
- WHA47.24 (1994) Assessment of Nauru. Cites: WHA22.6.
- WHA47.25 (1994) Real estate fund.
- WHA47.26 (1994) Cooperation agreement with the African Development Bank and the African Development Fund.
- WHA47.27 (1994) International Decade of the World's Indigenous People. Cites: WHA45.24. Cited by: WHA48.24, WHA49.26, WHA50.31, WHA51.24, WHA53.10, WHA54.16.
- WHA47.28 (1994) Collaboration within the United Nations system and with other intergovernmental organizations: health assistance to specific countries. Cites: WHA35.1, WHA41.33, WHA44.37, WHA44.38, WHA44.39, WHA44.40, WHA44.43, WHA46.29. Cited by: WHA48.2, WHA48.31.
- WHA47.29 (1994) Rwanda. Cited by: WHA48.2.
- WHA47.30 (1994) Health conditions of the Arab populations in the occupied Arab territories, including Palestine.
- WHA47.31 (1994) Salaries for ungraded posts and the Director-General.
- WHA47.32 (1994) Onchocerciasis control through ivermectin distribution. Cites: WHA37.32.
- WHA48.1 (1995) Transfer of Mongolia to the Western Pacific Region.
- WHA48.2 (1995) Emergency and humanitarian action. Cites: WHA42.16, WHA44.41, WHA46.6, WHA46.39, WHA47.28, WHA47.29. Cited by: WHA49.21, WHA52.12, WHA65.20.

Wernli, Falcone et al. BMJ Global Health, version 21.03.2023

- WHA48.3 (1995) Intensified cooperation with countries in greatest need. Cites: WHA42.3, WHA43.17, WHA46.30.
- WHA48.4 (1995) Interim financial report on the accounts of WHO for 1994 and comments thereon of the Administration, Budget and Finance Committee: interim financial report for the year 1994.
- WHA48.5 (1995) Status of collection of assessed contributions and status of advances to the Working Capital Fund. Cites: WHA41.12.
- WHA48.6 (1995) Members in arrears in the payment of their contributions to an extent which would justify invoking Article 7 of the Constitution. Cites: WHA41.7, WHA47.18. Cited by: WHA49.4, WHA51.3.
- WHA48.7 (1995) Revision and updating of the International Health Regulations. Cited by: WHA54.14, WHA56.28, WHA58.3, WHA75.13.
- WHA48.8 (1995) Reorientating medical education and medical practice for health for all. Cited by: WHA49.1, WHA54.12, WHA64.7.
- WHA48.9 (1995) Prevention of hearing impairment. Cites: WHA38.19, WHA42.28. Cited by: WHA70.13.
- WHA48.10 (1995) Reproductive health: WHO's role in the global strategy. Cites: WHA32.42, WHA38.22, WHA40.27, WHA41.9, WHA42.42, WHA43.10, WHA47.9. Cited by: WHA55.19.
- WHA48.11 (1995) An international strategy for tobacco control. Cites: WHA33.35, WHA39.14, WHA43.16, WHA45.20. Cited by: WHA49.16, WHA49.17.
- WHA48.12 (1995) Control of diarrhoeal diseases and acute respiratory infections: integrated management of the sick child. Cites: WHA40.34, WHA44.7.
- WHA48.13 (1995) Communicable diseases prevention and control: new, emerging and re-emerging infectious diseases. Cites: WHA39.27, WHA44.8, WHA45.35, WHA46.6, WHA46.31, WHA46.32, WHA46.36. Cited by: WHA51.29, WHA54.14, WHA56.19, WHA56.28, WHA56.29, WHA58.5.
- WHA48.14 (1995) WHO response to global change: review of the Constitution of the World Health Organization. Cited by: WHA50.23.
- WHA48.15 (1995) WHO response to global change. Cites: WHA47.6. Cited by: WHA49.23.
- WHA48.16 (1995) WHO response to global change: renewing the health-for-all strategy. Cites: WHA45.24. Cited by: WHA50.23, WHA50.28, WHA51.7.
- WHA48.17 (1995) WHO response to global change: technical discussions.
- WHA48.18 (1995) Appointment of external auditor.
- WHA48.19 (1995) Assessment of new Members and Associate Members: assessment of Palau. Cites: WHA22.6.
- WHA48.20 (1995) Scale of assessment for the financial period 1996-1997.
- WHA48.21 (1995) Review of the working capital fund.
- WHA48.22 (1995) Real estate fund.
- WHA48.23 (1995) Salaries for ungraded posts and the Director-General.
- WHA48.24 (1995) International Decade of the World's Indigenous People. Cites: WHA47.27. Cited by: WHA49.26, WHA50.31, WHA51.24, WHA53.10, WHA54.16.
- WHA48.25 (1995) Consolidating budgetary reform. Cites: WHA46.35, WHA47.8.
- WHA48.26 (1995) Reorientation of allocations. Cites: WHA29.48. Cited by: WHA51.31.
- WHA48.27 (1995) Paris AIDS Summit.
- WHA48.28 (1995) Recruitment of international staff in WHO: geographical representation. Cites: WHA46.23. Cited by: WHA49.9, WHA50.15, WHA50.16.
- WHA48.29 (1995) Health conditions of, and assistance to, the Arab population in the occupied Arab territories, including Palestine.
- WHA48.30 (1995) Establishment of the joint and cosponsored United Nations programme on HIV/AIDS (UNAIDS). Cited by: WHA49.27.
- WHA48.31 (1995) Collaboration within the United Nations system and with other intergovernmental organizations: health assistance to specific countries. Cites: WHA35.1, WHA44.37, WHA44.38, WHA44.39, WHA44.40, WHA44.41, WHA44.43, WHA47.28. Cited by: WHA49.28.

Wernli, Falcone et al. BMJ Global Health, version 21.03.2023

- WHA48.32 (1995) Appropriation resolution for the financial period 1996-1997. Cites: WHA41.12.
- WHA49.1 (1996) Strengthening nursing and midwifery. Cites: WHA42.27, WHA45.5, WHA47.9, WHA48.8. Cited by: WHA54.12, WHA59.27, WHA64.7, WHA74.15.
- WHA49.2 (1996) Financial report on the accounts of WHO for the financial period 1994-1995, report of the External Auditor, and comments thereon of the Administration, Budget and Finance Committee (Article 18(f); Financial Regulations 11.3 and 12.9).
- WHA49.3 (1996) Status of collection of assessed contributions. Cites: WHA41.12.
- WHA49.4 (1996) Members in arrears in the payment of their contributions to an extent which would justify invoking Article 7 of the Constitution. Cites: WHA41.7, WHA48.6. Cited by: WHA50.8, WHA51.3.
- WHA49.5 (1996) Arrears of contributions of South Africa. Cites: WHA47.1.
- WHA49.6 (1996) Reassignment of member states to regions. Cited by: WHA66.21.
- WHA49.7 (1996) Report of the ad hoc group.
- WHA49.8 (1996) Real estate fund.
- WHA49.9 (1996) Personnel matters: employment and participation of women in the work of WHO. Cites: WHA38.12, WHA48.28. Cited by: WHA50.16.
- WHA49.10 (1996) Smallpox eradication - destruction of variola virus stocks. Cites: WHA33.3, WHA33.4. Cited by: WHA52.10, WHA60.1.
- WHA49.11 (1996) New, emerging, and re-emerging infectious diseases: special programme on malaria. Cites: WHA38.24, WHA42.30, WHA46.32. Cited by: WHA50.34.
- WHA49.12 (1996) WHO global strategy for occupational health for all. Cites: WHA33.31. Cited by: WHA60.26.
- WHA49.13 (1996) Prevention and control of iodine deficiency disorders. Cites: WHA39.31, WHA43.2. Cited by: WHA52.24, WHA58.24.
- WHA49.14 (1996) Revised drug strategy. Cites: WHA39.27, WHA41.16, WHA43.20, WHA45.27, WHA47.12, WHA47.13, WHA47.16, WHA47.17. Cited by: WHA50.3, WHA52.19, WHA54.11, WHA60.16, WHA60.20, WHA61.21.
- WHA49.15 (1996) Infant and young child nutrition. Cites: WHA33.32, WHA34.22, WHA39.28, WHA45.34, WHA47.5. Cited by: WHA54.2, WHA55.25, WHA58.32, WHA59.21, WHA61.20, WHA63.23, WHA69.9, WHA71.9.
- WHA49.16 (1996) Tobacco-or-health programme. Cites: WHA48.11.
- WHA49.17 (1996) International framework convention for tobacco control. Cites: WHA29.55, WHA31.56, WHA33.35, WHA39.14, WHA43.16, WHA45.20, WHA48.11. Cited by: WHA52.18, WHA56.1, WHA59.17.
- WHA49.18 (1996) Collaboration within the United Nations system and with other intergovernmental organizations: supply of controlled drugs for emergency care.
- WHA49.19 (1996) Collaboration within the United Nations system and with other intergovernmental organizations: WHO policy on collaboration with partners for health development.
- WHA49.20 (1996) Collaboration within the United Nations system and with other intergovernmental organizations: orientation of WHO policy in support of African recovery and development.
- WHA49.21 (1996) Collaboration within the United Nations system and with other intergovernmental organizations: strengthening of the coordination of emergency humanitarian assistance. Cites: WHA48.2.
- WHA49.22 (1996) Collaboration within the United Nations system and with other intergovernmental organizations: International Programme to mitigate the Health Effects of the Chernobyl Accident (IPHECA). Cites: WHA44.36.
- WHA49.23 (1996) WHO reform and response to global change: progress report on reform (Personnel policy). Cites: WHA48.15.
- WHA49.24 (1996) Health conditions of, and assistance to, the Arab population in the occupied Arab territories, including Palestine.
- WHA49.25 (1996) Prevention of violence: public health priority. Cited by: WHA56.24, WHA67.15, WHA74.17.

Wernli, Falcone et al. BMJ Global Health, version 21.03.2023

- WHA49.26 (1996) Collaboration within the United Nations system and with other intergovernmental organizations: International Decade of the World's Indigenous People. Cites: WHA47.27, WHA48.24. Cited by: WHA50.31, WHA51.24, WHA53.10, WHA54.16.
- WHA49.27 (1996) Collaboration within the United Nations system and with other intergovernmental organizations: joint United Nations Programme on HIV/AIDS (UNAIDS). Cites: WHA40.26, WHA41.24, WHA42.33, WHA42.34, WHA43.10, WHA45.35, WHA48.30.
- WHA49.28 (1996) Collaboration within the United Nations system and with other intergovernmental organizations: health assistance to specific countries. Cites: WHA35.1, WHA44.37, WHA44.38, WHA44.39, WHA44.40, WHA44.43, WHA48.31.
- WHA49.29 (1996) Modification of regulations for expert advisory panels and committees. Cited by: WHA53.8.
- WHA50.1 (1997) Reimbursement of travelling expenses for attendance at the Health Assembly. Cites: WHA30.11. Cited by: WHA52.9.
- WHA50.2 (1997) WHO collaborating centres. Cites: WHA33.20.
- WHA50.3 (1997) Guidelines on the WHO Certification Scheme on the Quality of Pharmaceutical Products moving in International Commerce. Cites: WHA45.29, WHA49.14.
- WHA50.4 (1997) Cross-border advertising, promotion and sale of medical products through the Internet. Cited by: WHA51.9.
- WHA50.5 (1997) Interim financial report for the year 1996.
- WHA50.6 (1997) Transfer of funds from the Executive Board Special Fund to the Special Account for Disasters and Natural Catastrophes in the Voluntary Fund for Health Promotion.
- WHA50.7 (1997) Status of collection of assessed contributions. Cites: WHA41.12.
- WHA50.8 (1997) Members in arrears in the payment of their contributions to an extent which would justify invoking Article 7 of the Constitution. Cites: WHA41.7, WHA49.4. Cited by: WHA51.2, WHA51.3.
- WHA50.9 (1997) Assessment of Andorra for 1997. Cites: WHA8.5, WHA24.12, WHA26.21.
- WHA50.10 (1997) Real estate fund.
- WHA50.11 (1997) Relocation of the Regional Office for the Eastern Mediterranean from Alexandria to Cairo.
- WHA50.12 (1997) Establishment of the International Vaccine Institute.
- WHA50.13 (1997) Promotion of chemical safety, with special attention to persistent organic pollutants. Cites: WHA30.47, WHA31.28, WHA45.32, WHA46.20. Cited by: WHA63.25.
- WHA50.14 (1997) Protection of the marine environment.
- WHA50.15 (1997) Recruitment of international staff in WHO: geographical representation. Cites: WHA48.28. Cited by: WHA55.24.
- WHA50.16 (1997) Employment and participation of women in the work of WHO. Cites: WHA48.28, WHA49.9. Cited by: WHA56.17.
- WHA50.17 (1997) Salaries for ungraded posts and the Director-General.
- WHA50.18 (1997) Method of work of the Health Assembly and proposed amendments to its Rules of Procedure. Cites: WHA20.2, WHA32.36, WHA36.16. Cited by: WHA52.21.
- WHA50.19 (1997) Prevention of violence. Cited by: WHA56.24.
- WHA50.20 (1997) Quality of biological products moving in international commerce.
- WHA50.21 (1997) World Tuberculosis Day. Cites: WHA44.8, WHA46.36.
- WHA50.22 (1997) Arrears of payment, Bosnia and Herzegovina. Cited by: WHA51.2.
- WHA50.23 (1997) Report of the task force on health in development. Cites: WHA45.24, WHA48.14, WHA48.16.
- WHA50.24 (1997) Financing of the WHO worldwide management information system through the use of casual income.
- WHA50.25 (1997) Proposed appropriation resolution for the financial period 1998-1999. Cites: WHA41.12.
- WHA50.26 (1997) Proposed programme budget for the 1998-1999 biennium: reallocation to priority health programmes of amounts resulting from measures to increase efficiency.

Wernli, Falcone et al. BMJ Global Health, version 21.03.2023

- WHA50.27 (1997) Strengthening health systems in developing countries. Cites: WHA31.41, WHA31.51, WHA32.27, WHA35.24, WHA36.34, WHA37.15, WHA37.16, WHA38.23, WHA39.23, WHA40.17, WHA40.30, WHA42.37, WHA43.9, WHA46.17. Cited by: WHA51.16, WHA52.23, WHA54.13.
- WHA50.28 (1997) WHO reform: linking the renewed health-for-all strategy with the Tenth General Programme of Work, programme budgeting and evaluation. Cites: WHA48.16.
- WHA50.29 (1997) Elimination of lymphatic filariasis as a public health problem.
- WHA50.30 (1997) Arrears of payment, Cuba.
- WHA50.31 (1997) International Decade of the World's Indigenous People. Cites: WHA47.27, WHA48.24, WHA49.26. Cited by: WHA51.24, WHA53.10, WHA54.16.
- WHA50.32 (1997) Respect for equality among the official languages. Cites: WHA31.13. Cited by: WHA51.30, WHA61.12, WHA71.15.
- WHA50.33 (1997) Scale of assessments for the financial period 1998-1999.
- WHA50.34 (1997) Malaria prevention and control. Cites: WHA46.32, WHA49.11.
- WHA50.35 (1997) Eradication of dracunculiasis. Cites: WHA39.21, WHA42.29, WHA44.5. Cited by: WHA64.16.
- WHA50.36 (1997) African trypanosomiasis. Cited by: WHA56.7, WHA57.2.
- WHA50.37 (1997) Cloning in human reproduction. Cited by: WHA51.10.
- WHA50.38 (1997) Health conditions of, and assistance to, the Arab population in the occupied Arab territories, including Palestine.
- WHA51.1 (1998) Status of collection of assessed contributions. Cites: WHA41.12.
- WHA51.2 (1998) Members in arrears in the payment of their contributions to an extent which would justify invoking article 7 of the Constitution. Cites: WHA41.7, WHA50.8, WHA50.22. Cited by: WHA52.4.
- WHA51.3 (1998) Members in arrears in the payment of their contributions to an extent which would justify invoking article 7 of the Constitution: temporary restoration of voting privileges. Cites: WHA44.12, WHA45.8, WHA46.10, WHA47.18, WHA48.6, WHA49.4, WHA50.8.
- WHA51.4 (1998) Appointment of the Director-General.
- WHA51.5 (1998) Contract of the Director-General.
- WHA51.6 (1998) Expression of appreciation to Dr Hiroshi Nakajima.
- WHA51.7 (1998) Health-for-all policy for the twenty-first century. Cites: WHA48.16.
- WHA51.8 (1998) Concerted public health action on anti-personnel mines.
- WHA51.9 (1998) Cross-border advertising, promotion and sale of medical products using the internet. Cites: WHA41.17, WHA45.30, WHA47.16, WHA50.4. Cited by: WHA58.28, WHA60.16.
- WHA51.10 (1998) Ethical, scientific and social implications of cloning in human health. Cites: WHA50.37.
- WHA51.11 (1998) Global elimination of blinding trachoma. Cites: WHA22.29, WHA25.55, WHA28.54, WHA45.10. Cited by: WHA56.26, WHA73.4.
- WHA51.12 (1998) Health promotion. Cites: WHA42.44. Cited by: WHA57.16, WHA60.24, WHA67.12.
- WHA51.13 (1998) Tuberculosis. Cites: WHA44.8, WHA46.36. Cited by: WHA53.1, WHA58.14, WHA60.19, WHA62.15.
- WHA51.14 (1998) Elimination of transmission of Chagas disease. Cited by: WHA63.20.
- WHA51.15 (1998) Elimination of leprosy as a public health problem. Cites: WHA44.9.
- WHA51.16 (1998) Promotion of horizontal technical cooperation in health sector reform in developing countries. Cites: WHA31.41, WHA31.54, WHA32.27, WHA35.24, WHA36.34, WHA37.15, WHA37.16, WHA38.23, WHA39.23, WHA40.17, WHA40.30, WHA50.27. Cited by: WHA52.23, WHA54.13.
- WHA51.17 (1998) Emerging and other communicable diseases: antimicrobial resistance. Cited by: WHA54.14, WHA58.27, WHA67.25, WHA68.7.
- WHA51.18 (1998) Noncommunicable disease: prevention and control. Cited by: WHA53.17, WHA57.17, WHA58.22, WHA60.17, WHA71.6.

Wernli, Falcone et al. BMJ Global Health, version 21.03.2023

- WHA51.19 (1998) Financial report on the accounts of WHO for the financial period 1996-1997, report of the external auditor, and comments thereon of the Administration, Budget and Finance Committee (article 18(f); financial regulations 11.3 and 12.9).
- WHA51.20 (1998) Amendments to the financial regulations.
- WHA51.21 (1998) Scale of assessments for the financial period 1998-1999.
- WHA51.22 (1998) Collaboration within the United Nations system and with other intergovernmental organizations: health of children and adolescents. Cites: WHA42.41, WHA45.22.
- WHA51.23 (1998) Amendments to articles 24 and 25 of the Constitution.
- WHA51.24 (1998) International Decade of the World's Indigenous People. Cites: WHA47.27, WHA48.24, WHA49.26, WHA50.31. Cited by: WHA53.10, WHA54.16.
- WHA51.25 (1998) Salaries of staff in ungraded posts and of the Director-General.
- WHA51.26 (1998) Review of the Constitution and regional arrangements of the World Health Organization: status of members of the Executive Board: clarification of the interpretation of article 24 of the WHO Constitution.
- WHA51.27 (1998) Health conditions of, and assistance to, the Arab population in the occupied Arab territories, including Palestine.
- WHA51.28 (1998) Environmental matters: strategy on sanitation for high-risk communities. Cites: WHA39.20, WHA42.25, WHA44.27, WHA44.28, WHA45.31, WHA46.20. Cited by: WHA64.24, WHA72.7.
- WHA51.29 (1998) The protection of human health from threats related to climate change and stratospheric ozone depletion. Cites: WHA46.20, WHA48.13. Cited by: WHA61.19.
- WHA51.30 (1998) Method of work of the Health Assembly. Cites: WHA50.32. Cited by: WHA59.18, WHA61.12, WHA71.15.
- WHA51.31 (1998) Review of the Constitution and regional arrangements of the World Health Organization: regular budget allocations to regions. Cites: WHA48.26.
- WHA52.1 (1999) Status of collection of assessed contributions. Cites: WHA41.12.
- WHA52.2 (1999) Arrears in payment of contributions: Latvia.
- WHA52.3 (1999) Arrears in payment of contributions: Liberia. Cited by: WHA53.2.
- WHA52.4 (1999) Members in arrears in the payment of their contributions to an extent which would justify invoking article 7 of the Constitution. Cites: WHA41.7, WHA51.2. Cited by: WHA53.2.
- WHA52.5 (1999) Health conditions of, and assistance to, the Arab population in the occupied Arab territories, including Palestine.
- WHA52.6 (1999) Agreement between the World Health Organization and the Universal Postal Union.
- WHA52.7 (1999) Active ageing. Cited by: WHA58.16, WHA65.3, WHA69.3.
- WHA52.8 (1999) Appointment of the external auditor.
- WHA52.9 (1999) Reimbursement of travel expenses for attendance at regional committees. Cites: WHA34.4, WHA50.1.
- WHA52.10 (1999) Smallpox eradication: destruction of variola virus stocks. Cites: WHA49.10. Cited by: WHA55.15, WHA60.1.
- WHA52.11 (1999) Roll Back Malaria.
- WHA52.12 (1999) Support to Central American countries affected by Hurricane Mitch. Cites: WHA42.16, WHA48.2.
- WHA52.13 (1999) Salaries of staff in ungraded posts and of the Director-General.
- WHA52.14 (1999) Unaudited interim financial report on the accounts of WHO for 1998; report of the external auditor; report of the internal auditor.
- WHA52.15 (1999) Real estate fund.
- WHA52.16 (1999) Amendments to the financial regulations and rules.
- WHA52.17 (1999) Scale of assessments for the financial period 2000-2001.
- WHA52.18 (1999) Towards a WHO framework convention on tobacco control. Cites: WHA27.37, WHA49.17. Cited by: WHA53.16, WHA56.1, WHA59.17.



Wernli, Falcone et al. BMJ Global Health, version 21.03.2023

- WHA52.19 (1999) Revised drug strategy. Cites: WHA39.27, WHA41.16, WHA43.20, WHA45.27, WHA47.12, WHA47.13, WHA47.16, WHA47.17, WHA49.14. Cited by: WHA53.14, WHA54.11, WHA56.27, WHA59.24, WHA59.26, WHA60.16, WHA60.20, WHA61.21, WHA67.20, WHA67.23.
- WHA52.20 (1999) Appropriation resolution for the financial period 2000-2001. Cited by: WHA54.20, WHA56.32.
- WHA52.21 (1999) Reform of the Health Assembly. Cites: WHA50.18.
- WHA52.22 (1999) Poliomyelitis eradication.
- WHA52.23 (1999) Strengthening health systems in developing countries. Cites: WHA31.41, WHA31.54, WHA32.27, WHA35.24, WHA36.34, WHA37.15, WHA37.16, WHA38.23, WHA39.23, WHA40.17, WHA40.30, WHA50.27, WHA51.16. Cited by: WHA54.13.
- WHA52.24 (1999) Prevention and control of iodine deficiency disorders. Cites: WHA39.31, WHA43.2, WHA49.13. Cited by: WHA57.17, WHA58.24.
- WHA53.1 (2000) Stop Tuberculosis Initiative. Cites: WHA44.8, WHA46.36, WHA51.13. Cited by: WHA58.14.
- WHA53.2 (2000) Members in arrears in the payment of their contributions to an extent that would justify invoking article 7 of the Constitution. Cites: WHA41.7, WHA52.3, WHA52.4. Cited by: WHA54.5.
- WHA53.3 (2000) Financial report on the accounts of WHO for 1998-1999, report of the external auditor, and comments thereon made on behalf of the Executive Board; report of the internal auditor.
- WHA53.4 (2000) Real estate fund.
- WHA53.5 (2000) Casual income. Cites: WHA41.12.
- WHA53.6 (2000) Amendments to the financial regulations.
- WHA53.7 (2000) Salaries of staff in ungraded posts and of the Director-General.
- WHA53.8 (2000) Regulations for expert advisory panels and committees. Cites: WHA35.10, WHA49.29.
- WHA53.9 (2000) Participation of WHO in the 1986 Vienna Convention on the Law of Treaties between States and International Organizations or between International Organizations.
- WHA53.10 (2000) International Decade of the World's Indigenous People. Cites: WHA47.27, WHA48.24, WHA49.26, WHA50.31, WHA51.24. Cited by: WHA54.16.
- WHA53.11 (2000) Health conditions of, and assistance to, the Arab population in the occupied Arab territories, including Palestine.
- WHA53.12 (2000) Global Alliance for Vaccines and Immunization. Cited by: WHA58.15.
- WHA53.13 (2000) Collaboration within the United Nations system and with other intergovernmental organizations: aligning the participation of Palestine in the World Health Organization with its participation in the United Nations.
- WHA53.14 (2000) HIV/AIDS: confronting the epidemic. Cites: WHA52.19. Cited by: WHA56.30, WHA59.19, WHA59.24, WHA59.26, WHA61.21, WHA63.19, WHA64.14.
- WHA53.15 (2000) Food safety. Cited by: WHA56.23, WHA63.3, WHA73.5.
- WHA53.16 (2000) Framework convention on tobacco control. Cites: WHA52.18.
- WHA53.17 (2000) Prevention and control of noncommunicable diseases. Cites: WHA51.18. Cited by: WHA55.23, WHA57.17, WHA58.22, WHA60.17, WHA60.23, WHA61.14, WHA63.14, WHA64.11, WHA71.6.
- WHA54.1 (2001) General programme of work.
- WHA54.2 (2001) Infant and young child nutrition. Cites: WHA33.32, WHA34.22, WHA35.26, WHA37.30, WHA39.28, WHA41.11, WHA43.3, WHA45.34, WHA46.7, WHA47.5, WHA49.15. Cited by: WHA55.25, WHA57.17, WHA58.32, WHA59.21, WHA61.20, WHA63.23, WHA69.9, WHA71.9.
- WHA54.3 (2001) Salaries of staff in ungraded posts and of the Director-General.
- WHA54.4 (2001) Unaudited interim financial report on the accounts of WHO for 2000.
- WHA54.5 (2001) Members in arrears in the payment of their contributions to an extent which would justify invoking article 7 of the Constitution. Cites: WHA41.7, WHA53.2. Cited by: WHA55.4.

Wernli, Falcone et al. BMJ Global Health, version 21.03.2023

- WHA54.6 (2001) Special arrangements for settlement of arrears. Cites: WHA8.13, WHA41.7. Cited by: WHA70.1, WHA72.10, WHA72.14, WHA75.1, WHA75.2.
- WHA54.7 (2001) Real estate fund.
- WHA54.8 (2001) Casual income. Cites: WHA41.12.
- WHA54.9 (2001) Assessment of the Federal Republic of Yugoslavia. Cites: WHA8.5, WHA24.12.
- WHA54.10 (2001) Scaling up the response to HIV/AIDS. Cited by: WHA55.12, WHA59.24, WHA61.21.
- WHA54.11 (2001) WHO medicines strategy. Cites: WHA39.27, WHA41.16, WHA43.20, WHA45.27, WHA47.12, WHA47.16, WHA47.17, WHA49.14, WHA52.19. Cited by: WHA55.14, WHA56.27, WHA56.31, WHA60.16, WHA60.20, WHA62.13, WHA67.18, WHA67.20, WHA67.22, WHA68.6.
- WHA54.12 (2001) Strengthening nursing and midwifery. Cites: WHA42.27, WHA45.5, WHA47.9, WHA48.8, WHA49.1. Cited by: WHA59.27, WHA64.7, WHA74.15.
- WHA54.13 (2001) Strengthening health systems in developing countries. Cites: WHA31.41, WHA31.54, WHA32.27, WHA35.24, WHA36.34, WHA37.15, WHA37.16, WHA38.23, WHA39.23, WHA40.17, WHA40.30, WHA50.27, WHA51.16, WHA52.23. Cited by: WHA62.12.
- WHA54.14 (2001) Global health security: epidemic alert and response. Cites: WHA48.7, WHA48.13, WHA51.17. Cited by: WHA55.16, WHA56.28, WHA56.29, WHA58.3, WHA58.27, WHA67.25, WHA68.7.
- WHA54.15 (2001) Health conditions of, and assistance to, the Arab population in the occupied Arab territories, including Palestine.
- WHA54.16 (2001) International Decade of the World's Indigenous People. Cites: WHA47.27, WHA48.24, WHA49.26, WHA50.31, WHA51.24, WHA53.10.
- WHA54.17 (2001) Assessments for the financial period 2002-2003. Cited by: WHA54.20.
- WHA54.18 (2001) Transparency in tobacco control process. Cited by: WHA60.23.
- WHA54.19 (2001) Schistosomiasis and soil-transmitted helminth infections. Cites: WHA3.26, WHA28.53, WHA29.58. Cited by: WHA65.21.
- WHA54.20 (2001) Appropriation resolution for the financial period 2002-2003. Cites: WHA52.20, WHA54.17.
- WHA54.21 (2001) International classification of functioning, disability and health. Cited by: WHA58.23.
- WHA54.22 (2001) Reform of the Executive Board. Cited by: WHA57.8.
- WHA55.1 (2002) Centenary of the Pan American Health Organization.
- WHA55.2 (2002) Health conditions of, and assistance to, the Arab population in the occupied Arab territories, including Palestine.
- WHA55.3 (2002) Financial report on the accounts of WHO for 2000-2001; report of the external auditor, and comments thereon made on behalf of the Executive Board; report of the internal auditor.
- WHA55.4 (2002) Members in arrears to an extent which would justify invoking article 7 of the Constitution. Cites: WHA41.7, WHA54.5. Cited by: WHA56.10.
- WHA55.5 (2002) Arrears in payment of contributions: Azerbaijan.
- WHA55.6 (2002) Arrears in payment of contributions: the Dominican Republic.
- WHA55.7 (2002) Miscellaneous income. Cites: WHA41.12.
- WHA55.8 (2002) Real estate fund. Cited by: WHA56.13.
- WHA55.9 (2002) Revolving sales fund. Cites: WHA22.8.
- WHA55.10 (2002) Mental health: responding to the call for action. Cites: WHA28.84, WHA29.21, WHA30.38, WHA32.40, WHA33.27, WHA39.25. Cited by: WHA58.26, WHA65.4.
- WHA55.11 (2002) Health and sustainable development. Cited by: WHA61.21.
- WHA55.12 (2002) Contribution of WHO to the follow-up of the United Nations General Assembly special session on HIV/AIDS. Cites: WHA54.10. Cited by: WHA57.14.
- WHA55.13 (2002) Protection of medical missions during armed conflict. Cites: WHA46.39. Cited by: WHA65.20.
- WHA55.14 (2002) Ensuring accessibility of essential medicines. Cites: WHA54.11. Cited by: WHA56.27, WHA57.14, WHA61.21, WHA67.21.

Wernli, Falcone et al. BMJ Global Health, version 21.03.2023

- WHA55.15 (2002) Smallpox eradication: destruction of variola virus stocks. Cites: WHA52.10. Cited by: WHA60.1.
- WHA55.16 (2002) Global public health response to natural occurrence, accidental release or deliberate use of biological and chemical agents or radionuclear material that affect health. Cites: WHA45.32, WHA54.14. Cited by: WHA56.28, WHA58.3, WHA60.1, WHA63.3.
- WHA55.17 (2002) Dengue fever and dengue haemorrhagic fever prevention and control. Cites: WHA46.31.
- WHA55.18 (2002) Quality of care: patient safety. Cited by: WHA68.15, WHA72.6.
- WHA55.19 (2002) WHO's contribution to achievement of the development goals of the United Nations Millennium Declaration. Cites: WHA48.10. Cited by: WHA57.12, WHA58.30, WHA58.31.
- WHA55.20 (2002) Salaries of staff in ungraded posts and of the Director-General.
- WHA55.21 (2002) Amendments to the staff regulations.
- WHA55.22 (2002) Reimbursement of travel expenses for members of the Executive Board. Cites: WHA30.10.
- WHA55.23 (2002) Diet, physical activity and health. Cites: WHA53.17. Cited by: WHA57.17, WHA71.6.
- WHA55.24 (2002) The need for increased representation of developing countries in the Secretariat and in expert advisory panels and committees. Cites: WHA4.51, WHA35.10, WHA50.15. Cited by: WHA56.35.
- WHA55.25 (2002) Infant and young child nutrition. Cites: WHA33.32, WHA34.22, WHA35.26, WHA37.30, WHA39.28, WHA41.11, WHA43.3, WHA44.33, WHA45.34, WHA46.7, WHA46.27, WHA47.5, WHA49.15, WHA54.2. Cited by: WHA57.17, WHA58.32, WHA59.21, WHA61.20, WHA63.23, WHA69.9, WHA71.9.
- WHA56.1 (2003) WHO Framework Convention on Tobacco Control. Cites: WHA49.17, WHA52.18. Cited by: WHA58.22, WHA59.17, WHA60.17, WHA60.23, WHA61.14, WHA64.28.
- WHA56.2 (2003) Appointment of the Director-General.
- WHA56.3 (2003) Contract of the Director-General.
- WHA56.4 (2003) Expression of appreciation to Dr Gro Harlem Brundtland.
- WHA56.5 (2003) Health conditions of, and assistance to, the Arab population in the occupied Arab territories, including Palestine.
- WHA56.6 (2003) International Conference on Primary Health Care, Alma-Ata: twenty-fifth anniversary. Cited by: WHA62.12.
- WHA56.7 (2003) Pan African tsetse and trypanosomiasis eradication campaign. Cites: WHA50.36. Cited by: WHA57.2.
- WHA56.8 (2003) Appointment of the external auditor.
- WHA56.9 (2003) Unaudited interim financial report on the accounts of WHO for 2002.
- WHA56.10 (2003) Members in arrears in the payment of their contributions to an extent which would justify invoking article 7 of the Constitution. Cites: WHA41.7, WHA55.4.
- WHA56.11 (2003) Arrears in payment of contributions: Kazakhstan.
- WHA56.12 (2003) Assessments for 2002 and 2003.
- WHA56.13 (2003) Real estate fund. Cites: WHA55.8.
- WHA56.14 (2003) Real estate fund: Regional Office for Africa.
- WHA56.15 (2003) Assignment of the Democratic Republic of Timor-Leste to the South-East Asia Region.
- WHA56.16 (2003) Reassignment of Cyprus from the Eastern Mediterranean Region to the European Region.
- WHA56.17 (2003) Human resources: gender balance. Cites: WHA50.16.
- WHA56.18 (2003) Salaries of staff in ungraded posts and of the Director-General.
- WHA56.19 (2003) Prevention and control of influenza pandemics and annual epidemics. Cites: WHA22.47, WHA48.13. Cited by: WHA58.5, WHA63.1.
- WHA56.20 (2003) Reducing global measles mortality. Cited by: WHA61.15.

Wernli, Falcone et al. BMJ Global Health, version 21.03.2023

- WHA56.21 (2003) Strategy for child and adolescent health and development. Cited by: WHA58.30, WHA58.31, WHA64.28.
- WHA56.22 (2003) Strategic approach to international chemicals management: participation of global health partners. Cites: WHA42.26, WHA45.32. Cited by: WHA59.15.
- WHA56.23 (2003) Joint FAO/WHO evaluation of the work of the Codex Alimentarius Commission. Cites: WHA40.20, WHA53.15. Cited by: WHA57.17, WHA58.32, WHA59.26.
- WHA56.24 (2003) Implementing the recommendations of the World Report on Violence and Health. Cites: WHA49.25, WHA50.19. Cited by: WHA60.22, WHA64.28, WHA67.15, WHA68.15, WHA72.16, WHA74.17.
- WHA56.25 (2003) The role of contractual arrangements in improving health systems' performance.
- WHA56.26 (2003) Elimination of avoidable blindness. Cites: WHA22.29, WHA25.55, WHA28.54, WHA45.10, WHA51.11. Cited by: WHA59.25, WHA62.1, WHA66.4, WHA73.4.
- WHA56.27 (2003) Intellectual property rights, innovation and public health. Cites: WHA52.19, WHA54.11, WHA55.14. Cited by: WHA57.14, WHA59.24, WHA59.26, WHA61.21.
- WHA56.28 (2003) Revision of the International Health Regulations. Cites: WHA27.37, WHA48.7, WHA48.13, WHA54.14, WHA55.16. Cited by: WHA58.3, WHA58.5.
- WHA56.29 (2003) Severe acute respiratory syndrome (SARS). Cites: WHA48.13, WHA54.14. Cited by: WHA58.3.
- WHA56.30 (2003) Global health-sector strategy for HIV/AIDS. Cites: WHA53.14. Cited by: WHA57.14, WHA59.19, WHA61.21, WHA63.19, WHA64.14.
- WHA56.31 (2003) Traditional medicine. Cites: WHA22.54, WHA29.72, WHA30.49, WHA31.33, WHA40.33, WHA41.19, WHA42.43, WHA54.11. Cited by: WHA62.13, WHA67.18.
- WHA56.32 (2003) Appropriation resolution for the financial period 2004-2005. Cites: WHA52.20, WHA56.34. Cited by: WHA58.4, WHA60.12.
- WHA56.33 (2003) Scale of assessments for the financial period 2004-2005. Cited by: WHA56.34, WHA63.5.
- WHA56.34 (2003) Adjustment mechanism. Cites: WHA56.33. Cited by: WHA56.32, WHA57.15, WHA58.4.
- WHA56.35 (2003) Representation of developing countries in the Secretariat. Cites: WHA55.24.
- WHA57.1 (2004) Surveillance and control of Mycobacterium ulcerans disease (Buruli ulcer).
- WHA57.2 (2004) Control of human African trypanosomiasis. Cites: WHA50.36, WHA56.7.
- WHA57.3 (2004) Health conditions of, and assistance to, the Arab population in the occupied Arab territories, including Palestine.
- WHA57.4 (2004) Financial report on the accounts of WHO for 2002-2003; report of the External Auditor and comments thereon made on behalf of the Executive Board.
- WHA57.5 (2004) Members in arrears in the payment of their contributions to an extent that would justify invoking article 7 of the Constitution. Cites: WHA41.7.
- WHA57.6 (2004) Arrears in payment of contributions: Ukraine. Cites: WHA45.23.
- WHA57.7 (2004) Agreement with the Office International des Epizooties.
- WHA57.8 (2004) Rules of procedure of the World Health Assembly: amendment to Rule 72. Cites: WHA33.17, WHA54.22.
- WHA57.9 (2004) Eradication of dracunculiasis. Cited by: WHA64.16.
- WHA57.10 (2004) Road safety and health. Cites: WHA27.59. Cited by: WHA58.26, WHA60.22, WHA64.27, WHA68.15, WHA68.20, WHA69.7, WHA72.16.
- WHA57.11 (2004) Family health in the context of the tenth anniversary of the International Year of the Family. Cites: WHA46.27.
- WHA57.12 (2004) Reproductive health: draft strategy to accelerate progress towards the attainment of international development goals and targets. Cites: WHA55.19. Cited by: WHA58.22, WHA58.30, WHA58.31, WHA59.19, WHA64.28.
- WHA57.13 (2004) Genomics and world health. Cited by: WHA59.20, WHA63.17.

Wernli, Falcone et al. BMJ Global Health, version 21.03.2023

- WHA57.14 (2004) Scaling up treatment and care within a coordinated and comprehensive response to HIV/AIDS. Cites: WHA55.12, WHA55.14, WHA56.27, WHA56.30. Cited by: WHA58.25, WHA58.30, WHA59.11, WHA59.24, WHA59.26, WHA60.17, WHA61.21.
- WHA57.15 (2004) Scale of assessments for 2005. Cites: WHA56.34.
- WHA57.16 (2004) Health promotion and healthy lifestyles. Cites: WHA42.44, WHA51.12. Cited by: WHA58.22, WHA58.26, WHA60.17, WHA60.23, WHA60.24, WHA61.4, WHA67.12.
- WHA57.17 (2004) Global strategy on diet, physical activity and health. Cites: WHA46.7, WHA51.18, WHA52.24, WHA53.17, WHA54.2, WHA55.23, WHA55.25, WHA56.23. Cited by: WHA58.22, WHA58.24, WHA58.26, WHA58.32, WHA60.17, WHA60.23, WHA61.14, WHA63.14, WHA64.28, WHA66.10, WHA71.6, WHA73.10.
- WHA57.18 (2004) Human organ and tissue transplantation. Cites: WHA40.13, WHA42.5, WHA44.25. Cited by: WHA63.22.
- WHA57.19 (2004) International migration of health personnel: a challenge for health systems in developing countries. Cites: WHA22.51, WHA25.42. Cited by: WHA58.17, WHA58.30, WHA59.23, WHA59.26, WHA59.27, WHA61.17, WHA62.12, WHA64.6.
- WHA58.1 (2005) Health action in relation to crises and disasters, with particular emphasis on the earthquakes and tsunamis of 26 December 2004. Cited by: WHA59.22, WHA64.10, WHA65.20.
- WHA58.2 (2005) Malaria control. Cited by: WHA64.17, WHA68.2, WHA74.9.
- WHA58.3 (2005) Revision of the International Health Regulations. Cites: WHA48.7, WHA54.14, WHA55.16, WHA56.28, WHA56.29. Cited by: WHA59.2, WHA61.2, WHA65.23, WHA69.1, WHA73.8, WHA74.7.
- WHA58.4 (2005) Appropriation resolution for the financial period 2006-2007. Cites: WHA56.32, WHA56.34. Cited by: WHA60.8.
- WHA58.5 (2005) Strengthening pandemic influenza preparedness and response. Cites: WHA22.47, WHA48.13, WHA56.19, WHA56.28. Cited by: WHA59.2, WHA60.28.
- WHA58.6 (2005) Health conditions in the occupied Palestinian territory, including East Jerusalem, and in the occupied Syrian Golan.
- WHA58.7 (2005) Members in arrears in the payment of their contributions to an extent which would justify invoking article 7 of the Constitution. Cites: WHA41.7.
- WHA58.8 (2005) Arrears in payment of contributions: Georgia.
- WHA58.9 (2005) Arrears in payment of contributions: Iraq.
- WHA58.10 (2005) Arrears in payment of contributions: Republic of Moldova.
- WHA58.11 (2005) Arrears in payment of contributions: Tajikistan.
- WHA58.12 (2005) Salaries of staff in ungraded posts and of the Director-General.
- WHA58.13 (2005) Blood safety: proposal to establish World Blood Donor Day. Cites: WHA28.72. Cited by: WHA63.12, WHA63.18, WHA67.6.
- WHA58.14 (2005) Sustainable financing for tuberculosis prevention and control. Cites: WHA51.13, WHA53.1. Cited by: WHA60.19, WHA62.15.
- WHA58.15 (2005) Global immunization strategy. Cites: WHA53.12. Cited by: WHA63.24, WHA65.17, WHA65.18, WHA68.6.
- WHA58.16 (2005) Strengthening active and healthy ageing. Cites: WHA52.7. Cited by: WHA60.17, WHA65.3, WHA69.3.
- WHA58.17 (2005) International migration of health personnel: a challenge for health systems in developing countries. Cites: WHA57.19. Cited by: WHA61.17, WHA62.12.
- WHA58.18 (2005) Unaudited interim financial report on the accounts of WHO for 2004.
- WHA58.19 (2005) Assessments for 2006-2007.
- WHA58.20 (2005) Amendments to the financial regulations and financial rules.
- WHA58.21 (2005) Real estate fund.
- WHA58.22 (2005) Cancer prevention and control. Cites: WHA51.18, WHA53.17, WHA56.1, WHA57.12, WHA57.16, WHA57.17. Cited by: WHA60.17, WHA60.23, WHA67.19, WHA70.12.

Wernli, Falcone et al. BMJ Global Health, version 21.03.2023

- WHA58.23 (2005) Disability, including prevention, management and rehabilitation. Cites: WHA54.21. Cited by: WHA64.27, WHA66.9, WHA68.15, WHA70.13, WHA74.8.
- WHA58.24 (2005) Sustaining the elimination of iodine deficiency disorders. Cites: WHA49.13, WHA52.24, WHA57.17. Cited by: WHA60.21.
- WHA58.25 (2005) United Nations reform process and WHO's role in harmonization of operational development activities at country level. Cites: WHA57.14. Cited by: WHA58.30.
- WHA58.26 (2005) Public-health problems caused by harmful use of alcohol. Cites: WHA32.40, WHA36.12, WHA42.20, WHA55.10, WHA57.10, WHA57.16, WHA57.17. Cited by: WHA60.17, WHA60.23, WHA61.4, WHA61.14, WHA63.13.
- WHA58.27 (2005) Improving the containment of antimicrobial resistance. Cites: WHA39.27, WHA47.13, WHA51.17, WHA54.14. Cited by: WHA60.16, WHA60.20, WHA67.22, WHA67.25, WHA68.7, WHA75.13.
- WHA58.28 (2005) eHealth. Cites: WHA51.9. Cited by: WHA60.27, WHA66.24, WHA71.7.
- WHA58.29 (2005) Enhancement of laboratory biosafety.
- WHA58.30 (2005) Accelerating achievement of the internationally agreed health-related development goals, including those contained in the Millennium Declaration. Cites: WHA55.19, WHA56.21, WHA57.12, WHA57.14, WHA57.19, WHA58.25. Cited by: WHA60.25, WHA60.27.
- WHA58.31 (2005) Working towards universal coverage of maternal, newborn and child health interventions. Cites: WHA55.19, WHA56.21, WHA57.12. Cited by: WHA63.17, WHA64.13, WHA67.10.
- WHA58.32 (2005) Infant and young child nutrition. Cites: WHA34.22, WHA39.28, WHA41.11, WHA46.7, WHA47.5, WHA49.15, WHA54.2, WHA55.25, WHA56.23, WHA57.17. Cited by: WHA59.21, WHA61.20, WHA63.23, WHA69.9, WHA71.9.
- WHA58.33 (2005) Sustainable health financing, universal coverage and social health insurance. Cited by: WHA62.12, WHA62.15, WHA64.9, WHA67.23.
- WHA58.34 (2005) Ministerial Summit on Health Research. Cited by: WHA60.15, WHA60.27, WHA61.21, WHA63.21, WHA75.8.
- SSA1.1 (2006) Appointment of the Director-General.
- WHA59.1 (2006) Eradication of poliomyelitis. Cited by: WHA60.14, WHA68.3.
- SSA1.2 (2006) Contract of the Director-General.
- WHA59.2 (2006) Application of the International Health Regulations (2005). Cites: WHA58.3, WHA58.5. Cited by: WHA60.28, WHA61.2, WHA63.1.
- SSA1.3 (2006) Commemoration of the contribution of the late Dr Jong-wook Lee.
- WHA59.3 (2006) Health conditions in the occupied Palestinian territory, including east Jerusalem, and in the occupied Syrian Golan.
- WHA59.4 (2006) Eleventh general programme of work, 2006-2015. Cited by: WHA60.11.
- WHA59.5 (2006) Members in arrears in the payment of their contributions to an extent that would justify invoking article 7 of the Constitution. Cites: WHA41.7.
- WHA59.6 (2006) Arrears in payment of contributions: Afghanistan. Cited by: WHA65.11, WHA66.13.
- WHA59.7 (2006) Arrears in payment of contributions: Armenia.
- WHA59.8 (2006) Arrears in payment of contributions: Central African Republic.
- WHA59.9 (2006) Arrears in payment of contributions: Dominican Republic.
- WHA59.10 (2006) Arrears in payment of contributions: Turkmenistan.
- WHA59.11 (2006) Nutrition and HIV/AIDS. Cites: WHA57.14.
- WHA59.12 (2006) Implementation by WHO of the recommendations of the Global Task Force on Improving AIDS Coordination among Multinational Institutions and International Donors. Cited by: WHA63.19, WHA64.14.
- WHA59.13 (2006) Financial report on the accounts of WHO for 2004-1005.
- WHA59.14 (2006) Salaries of staff in ungraded posts and the Director-General.
- WHA59.15 (2006) Strategic approach to international chemical management. Cites: WHA56.22. Cited by: WHA63.25, WHA63.26, WHA67.11, WHA67.12, WHA69.4.
- WHA59.16 (2006) Codex Alimentarius Commission: amendments to statutes.



Wernli, Falcone et al. BMJ Global Health, version 21.03.2023

- WHA59.17 (2006) Outcome of the first session of the Conference of the Parties to the WHO Framework Convention on Tobacco Control. Cites: WHA49.17, WHA52.18, WHA56.1. Cited by: WHA60.17.
- WHA59.18 (2006) Rules of procedure of the World Health Assembly: rule 14: dispatch of documents. Cites: WHA51.30.
- WHA59.19 (2006) Prevention and control of sexually transmitted infections: global strategy. Cites: WHA46.37, WHA53.14, WHA56.30, WHA57.12. Cited by: WHA63.19, WHA64.14, WHA64.28, WHA69.22.
- WHA59.20 (2006) Sickle-cell anaemia. Cites: WHA57.13.
- WHA59.21 (2006) Infant and young child nutrition 2006. Cites: WHA34.22, WHA35.26, WHA37.30, WHA39.28, WHA41.11, WHA43.3, WHA44.33, WHA47.5, WHA49.15, WHA54.2, WHA55.25, WHA58.32. Cited by: WHA61.20, WHA63.23, WHA69.9, WHA71.9.
- WHA59.22 (2006) Emergency preparedness and response. Cites: WHA58.1. Cited by: WHA64.10, WHA65.20.
- WHA59.23 (2006) Rapid upscaling of workforce production. Cites: WHA57.19. Cited by: WHA64.6, WHA66.23.
- WHA59.24 (2006) Public health, innovation, essential health research and intellectual property rights: towards a global strategy and plan of action. Cites: WHA27.37, WHA52.19, WHA53.14, WHA54.10, WHA56.27, WHA57.14. Cited by: WHA60.30, WHA61.21, WHA65.22, WHA66.22, WHA67.20.
- WHA59.25 (2006) Prevention of avoidable blindness and visual impairment. Cites: WHA56.26. Cited by: WHA62.1, WHA66.4, WHA73.4.
- WHA59.26 (2006) International trade and health. Cites: WHA52.19, WHA53.14, WHA56.23, WHA56.27, WHA57.14, WHA57.19. Cited by: WHA61.21.
- WHA59.27 (2006) Strengthening nursing and midwifery. Cites: WHA42.27, WHA45.5, WHA49.1, WHA54.12, WHA57.19. Cited by: WHA64.7, WHA74.15.
- WHA60.1 (2007) Smallpox eradication: destruction of variola virus stocks. Cites: WHA49.10, WHA52.10, WHA55.15, WHA55.16.
- WHA60.2 (2007) Health conditions in the occupied Palestinian territory, including east Jerusalem, and in the occupied Syrian Golan.
- WHA60.3 (2007) Unaudited interim financial report on the accounts of WHO for 2006 and comments thereon made by the Programme, Budget and Administration Committee of the Executive Board.
- WHA60.4 (2007) Status of collection of assessed contributions, including member states in arrears in the payment of their contributions to an extent that would justify invoking article 7 of the Constitution. Cites: WHA41.7.
- WHA60.5 (2007) Scale of assessments 2008-2009.
- WHA60.6 (2007) Assessment of new member.
- WHA60.7 (2007) Appointment of the external auditor.
- WHA60.8 (2007) Financial period 2006-2007: implementation of resolution WHA58.4. Cites: WHA58.4.
- WHA60.9 (2007) Amendments to the financial regulations and financial rules: introduction of public sector accounting standards. Cited by: WHA62.6, WHA64.22.
- WHA60.10 (2007) Amendments to the staff regulations and staff rules.
- WHA60.11 (2007) Medium-term strategic plan 2008-2013. Cites: WHA59.4. Cited by: WHA61.12, WHA62.11.
- WHA60.12 (2007) Appropriation resolution for the financial period 2008-2009. Cites: WHA56.32. Cited by: WHA61.6.
- WHA60.13 (2007) Control of leishmaniasis.
- WHA60.14 (2007) Poliomyelitis: mechanism for management of potential risks to eradication. Cites: WHA59.1. Cited by: WHA61.1.
- WHA60.15 (2007) WHO's role and responsibilities in health research. Cites: WHA58.34. Cited by: WHA63.21.

Wernli, Falcone et al. BMJ Global Health, version 21.03.2023

- WHA60.16 (2007) Progress in the rational use of medicines. Cites: WHA39.27, WHA41.16, WHA41.17, WHA43.20, WHA45.27, WHA45.30, WHA47.12, WHA47.13, WHA47.16, WHA49.14, WHA51.9, WHA52.19, WHA54.11, WHA58.27. Cited by: WHA67.22, WHA67.23, WHA67.25, WHA68.7.
- WHA60.17 (2007) Oral health: action plan for promotion and integrated disease prevention. Cites: WHA22.30, WHA28.64, WHA31.50, WHA36.14, WHA42.39, WHA51.18, WHA53.17, WHA56.1, WHA57.14, WHA57.16, WHA57.17, WHA58.16, WHA58.22, WHA58.26, WHA59.17. Cited by: WHA67.11, WHA74.5.
- WHA60.18 (2007) Malaria, including proposal for establishment of Malaria Day. Cited by: WHA61.21, WHA64.17, WHA68.2, WHA74.9.
- WHA60.19 (2007) Tuberculosis control: progress and long-term planning. Cites: WHA51.13, WHA58.14. Cited by: WHA62.15, WHA67.1.
- WHA60.20 (2007) Better medicines for children. Cites: WHA39.27, WHA41.16, WHA41.17, WHA43.20, WHA45.27, WHA47.12, WHA47.13, WHA49.14, WHA52.19, WHA54.11, WHA58.27. Cited by: WHA67.22, WHA69.20, WHA69.25, WHA74.6.
- WHA60.21 (2007) Sustaining the elimination of iodine deficiency disorders. Cites: WHA58.24.
- WHA60.22 (2007) Health systems: emergency-care systems. Cites: WHA56.24, WHA57.10. Cited by: WHA62.12, WHA64.27, WHA64.28, WHA68.15, WHA69.7, WHA72.16.
- WHA60.23 (2007) Prevention and control of noncommunicable diseases: implementation of the global strategy. Cites: WHA53.17, WHA54.18, WHA56.1, WHA57.16, WHA57.17, WHA58.22, WHA58.26. Cited by: WHA61.14, WHA63.14.
- WHA60.24 (2007) Health promotion in a globalized world. Cites: WHA42.44, WHA51.12, WHA57.16. Cited by: WHA62.12, WHA62.14, WHA67.12.
- WHA60.25 (2007) Strategy for integrating gender analysis and actions into the work of WHO. Cites: WHA58.30.
- WHA60.26 (2007) Workers' health: draft global plan of action. Cites: WHA49.12.
- WHA60.27 (2007) Strengthening of health information systems. Cites: WHA58.28, WHA58.30, WHA58.34. Cited by: WHA62.12, WHA69.24.
- WHA60.28 (2007) Pandemic influenza preparedness: sharing of influenza viruses and access to vaccines and other benefits. Cites: WHA58.5, WHA59.2. Cited by: WHA62.10, WHA63.1.
- WHA60.29 (2007) Health technologies. Cited by: WHA67.22, WHA67.23.
- WHA60.30 (2007) Public health, innovation, and intellectual property. Cites: WHA59.24. Cited by: WHA61.21.
- WHA61.1 (2008) Poliomyelitis: mechanism for management of potential risks to eradication. Cites: WHA60.14. Cited by: WHA65.5.
- WHA61.2 (2008) Implementation of the International Health Regulations (2005). Cites: WHA58.3, WHA59.2. Cited by: WHA65.23.
- WHA61.3 (2008) Health conditions in the occupied Palestinian territory, including east Jerusalem, and in the occupied Syrian Golan.
- WHA61.4 (2008) Strategies to reduce the harmful use of alcohol. Cites: WHA32.40, WHA36.12, WHA42.20, WHA57.16, WHA58.26. Cited by: WHA63.13.
- WHA61.5 (2008) Financial report and audited financial statements for the financial period 1 January - 31 December 2007.
- WHA61.6 (2008) Miscellaneous income 2006-2007 and financing gap for strategic objectives 12 and 13. Cites: WHA60.12.
- WHA61.7 (2008) Members in arrears in the payment of their contributions to an extent that would justify invoking article 7 of the Constitution. Cites: WHA41.7.
- WHA61.8 (2008) Special arrangements for settlement of arrears: Kyrgyzstan. Cited by: WHA64.19, WHA66.13, WHA68.11.
- WHA61.9 (2008) Report of the external auditor to the Health Assembly.
- WHA61.10 (2008) Amendments to the staff regulations and staff rules.
- WHA61.11 (2008) Method of work of the Health Assembly.

Wernli, Falcone et al. BMJ Global Health, version 21.03.2023

- WHA61.12 (2008) Multilingualism: implementation of action plan. Cites: WHA50.32, WHA51.30, WHA60.11.
- WHA61.13 (2008) International Agency for Research on Cancer: amendments to statute.
- WHA61.14 (2008) Prevention and control of noncommunicable diseases: implementation of the global strategy. Cites: WHA53.17, WHA56.1, WHA57.17, WHA58.26, WHA60.23. Cited by: WHA62.1, WHA63.14, WHA64.28.
- WHA61.15 (2008) Global immunization strategy. Cites: WHA56.20. Cited by: WHA65.17, WHA65.18, WHA68.6.
- WHA61.16 (2008) Female genital mutilation. Cites: WHA47.10. Cited by: WHA67.15, WHA74.17.
- WHA61.17 (2008) Health of migrants. Cites: WHA57.19, WHA58.17. Cited by: WHA62.12, WHA67.1, WHA70.15.
- WHA61.18 (2008) Monitoring of the achievement of the health-related Millennium Development Goals. Cited by: WHA62.12, WHA62.14, WHA63.15, WHA63.24, WHA64.12.
- WHA61.19 (2008) Climate change and health. Cites: WHA51.29. Cited by: WHA62.14, WHA63.25, WHA64.10, WHA67.12, WHA68.8.
- WHA61.20 (2008) Infant and young child nutrition: biennial progress report. Cites: WHA34.22, WHA35.26, WHA37.30, WHA39.28, WHA41.11, WHA43.3, WHA45.34, WHA47.5, WHA49.15, WHA54.2, WHA55.25, WHA58.32, WHA59.21. Cited by: WHA63.23, WHA69.9, WHA71.9.
- WHA61.21 (2008) Global strategy and plan of action on public health, innovation and intellectual property. Cites: WHA49.14, WHA52.19, WHA53.14, WHA54.10, WHA55.11, WHA55.14, WHA56.27, WHA56.30, WHA57.14, WHA58.34, WHA59.24, WHA59.26, WHA60.18, WHA60.30. Cited by: WHA62.13, WHA62.16, WHA63.21, WHA63.28, WHA65.22, WHA67.6, WHA67.18, WHA67.22, WHA68.6, WHA68.18, WHA69.11, WHA69.25, WHA74.6, WHA75.14.
- WHA62.1 (2009) Prevention of avoidable blindness and visual impairment. Cites: WHA56.26, WHA59.25, WHA61.14. Cited by: WHA66.4, WHA73.4.
- WHA62.2 (2009) Health conditions in the occupied Palestinian territory, including east Jerusalem and in the occupied Syrian Golan.
- WHA62.3 (2009) Unaudited interim financial report on the accounts of WHO for 2008.
- WHA62.4 (2009) Status of collection of assessed contributions, including member states in arrears in the payment of their contributions to an extent that would justify invoking article 7 of the Constitution. Cites: WHA41.7.
- WHA62.5 (2009) Scale of assessments 2010-2011.
- WHA62.6 (2009) Amendments to the financial regulations and financial rules. Cites: WHA60.9.
- WHA62.7 (2009) Amendments to staff regulations.
- WHA62.8 (2009) Salaries of staff in ungraded posts and of the Director-General.
- WHA62.9 (2009) Appropriation resolution for the financial period 2010-2011.
- WHA62.10 (2009) Pandemic influenza preparedness: sharing of influenza viruses and access to vaccines and other benefits. Cites: WHA60.28. Cited by: WHA63.1.
- WHA62.11 (2009) Medium-term strategic plan 2008-2013, including programme budget 2010-2011. Cites: WHA60.11.
- WHA62.12 (2009) Primary health care, including health system strengthening. Cites: WHA54.13, WHA56.6, WHA57.19, WHA58.17, WHA58.33, WHA60.22, WHA60.24, WHA60.27, WHA61.17, WHA61.18. Cited by: WHA63.23, WHA64.7, WHA64.8, WHA64.9, WHA69.1, WHA69.19, WHA69.24, WHA73.10.
- WHA62.13 (2009) Traditional medicine. Cites: WHA22.54, WHA29.72, WHA30.49, WHA31.33, WHA40.33, WHA41.19, WHA42.43, WHA54.11, WHA56.31, WHA61.21. Cited by: WHA67.18, WHA69.19.
- WHA62.14 (2009) Reducing health inequities through action on the social determinants of health. Cites: WHA30.43, WHA60.24, WHA61.18, WHA61.19. Cited by: WHA65.8, WHA67.14, WHA74.16.
- WHA62.15 (2009) Prevention and control of multidrug-resistant tuberculosis and extensively drug-resistant tuberculosis. Cites: WHA51.13, WHA58.14, WHA58.33, WHA60.19. Cited by: WHA67.1.

Wernli, Falcone et al. BMJ Global Health, version 21.03.2023

- WHA62.16 (2009) Global strategy and plan of action on public health, innovation and intellectual property. Cites: WHA61.21. Cited by: WHA65.22, WHA68.18, WHA69.11, WHA74.6, WHA75.14.
- WHA63.1 (2010) Pandemic influenza preparedness: sharing of influenza viruses and access to vaccines and other benefits. Cites: WHA56.19, WHA59.2, WHA60.28, WHA62.10.
- WHA63.2 (2010) Health conditions in the occupied Palestinian territory, including east Jerusalem, and in the occupied Syrian Golan.
- WHA63.3 (2010) Advancing food safety initiatives. Cites: WHA53.15, WHA55.16. Cited by: WHA73.5.
- WHA63.4 (2010) Financial report and audited financial statements for the period 1 January 2008-31 December 2009.
- WHA63.5 (2010) Scale of assessments 2010-2011. Cites: WHA56.33.
- WHA63.6 (2010) Safety and security of staff and premises.
- WHA63.7 (2010) The Capital Master Plan.
- WHA63.8 (2010) Report of the external auditor.
- WHA63.9 (2010) Salaries of staff in ungraded posts.
- WHA63.10 (2010) Partnerships.
- WHA63.11 (2010) Agreements with intergovernmental organizations.
- WHA63.12 (2010) Availability, safety and quality of blood products. Cites: WHA28.72, WHA58.13. Cited by: WHA67.20, WHA74.6.
- WHA63.13 (2010) Global strategy to reduce the harmful use of alcohol. Cites: WHA58.26, WHA61.4. Cited by: WHA64.28, WHA66.10.
- WHA63.14 (2010) Marketing of food and non-alcoholic beverages to children. Cites: WHA53.17, WHA57.17, WHA60.23, WHA61.14. Cited by: WHA64.28, WHA66.10.
- WHA63.15 (2010) Monitoring of the achievement of the health-related Millennium Development Goals. Cites: WHA61.18. Cited by: WHA64.12, WHA65.7, WHA66.7, WHA67.10.
- WHA63.16 (2010) WHO global code of practice on the international recruitment of health personnel. Cited by: WHA64.6, WHA64.7, WHA66.23, WHA67.14, WHA67.24, WHA69.19, WHA69.24, WHA70.6, WHA74.14, WHA74.15, WHA75.17.
- WHA63.17 (2010) Birth defects. Cites: WHA57.13, WHA58.31.
- WHA63.18 (2010) Viral hepatitis. Cites: WHA28.72, WHA45.17, WHA58.13. Cited by: WHA67.6, WHA69.22.
- WHA63.19 (2010) WHO HIV/AIDS strategy for 2011-2015. Cites: WHA53.14, WHA56.30, WHA59.12, WHA59.19. Cited by: WHA64.14.
- WHA63.20 (2010) Chagas disease: control and elimination. Cites: WHA51.14.
- WHA63.21 (2010) WHO's role and responsibilities in health research. Cites: WHA58.34, WHA60.15, WHA61.21. Cited by: WHA64.7, WHA66.22, WHA67.23, WHA75.8.
- WHA63.22 (2010) Human organ and tissue transplantation. Cites: WHA40.13, WHA42.5, WHA44.25, WHA57.18.
- WHA63.23 (2010) Infant and young child nutrition. Cites: WHA33.32, WHA34.22, WHA35.26, WHA37.30, WHA39.28, WHA41.11, WHA43.3, WHA45.34, WHA46.7, WHA47.5, WHA49.15, WHA54.2, WHA55.25, WHA58.32, WHA59.21, WHA61.20, WHA62.12. Cited by: WHA64.13, WHA64.24, WHA65.6, WHA69.9, WHA71.9, WHA72.7.
- WHA63.24 (2010) Accelerated progress towards achievement of Millennium Goal 4 to reduce child mortality: prevention and treatment of pneumonia. Cites: WHA58.15, WHA61.18. Cited by: WHA64.12.
- WHA63.25 (2010) Improvement of health through safe and environmentally sound waste management. Cites: WHA30.47, WHA31.28, WHA45.32, WHA50.13, WHA59.15, WHA61.19. Cited by: WHA67.11, WHA67.12, WHA69.4.
- WHA63.26 (2010) Improvement of health through sound management of obsolete pesticides and other obsolete chemicals. Cites: WHA59.15. Cited by: WHA67.12, WHA69.4.
- WHA63.27 (2010) Strengthening the capacity of governments to constructively engage the private sector in providing essential health-care services.

Wernli, Falcone et al. BMJ Global Health, version 21.03.2023

- WHA63.28 (2010) Establishment of a consultative working group on research and development: financing and coordination. Cites: WHA61.21. Cited by: WHA65.22, WHA66.22.
- WHA64.1 (2011) Implementation of the International Health Regulations (2005). Cited by: WHA65.23.
- WHA64.2 (2011) WHO reform. Cited by: WHA69.10.
- WHA64.3 (2011) Appropriation resolution for the financial period 2012-2013.
- WHA64.4 (2011) Health conditions in the occupied Palestinian territory, including east Jerusalem, and in the occupied Syrian Golan.
- WHA64.5 (2011) Pandemic influenza preparedness: sharing of influenza viruses and access to vaccines and other benefits.
- WHA64.6 (2011) Health workforce strengthening. Cites: WHA57.19, WHA59.23, WHA63.16. Cited by: WHA68.15, WHA69.19, WHA70.6.
- WHA64.7 (2011) Strengthening nursing and midwifery. Cites: WHA42.27, WHA45.5, WHA47.9, WHA48.8, WHA49.1, WHA54.12, WHA59.27, WHA62.12, WHA63.16, WHA63.21. Cited by: WHA69.19, WHA69.24, WHA70.6, WHA74.15.
- WHA64.8 (2011) Strengthening national policy dialogue to build more robust health policies, strategies and plans. Cites: WHA62.12. Cited by: WHA69.19.
- WHA64.9 (2011) Sustainable health financing structures and universal coverage. Cites: WHA58.33, WHA62.12. Cited by: WHA66.23, WHA67.10, WHA67.22, WHA67.23, WHA69.1, WHA69.3, WHA69.19, WHA69.24, WHA69.25.
- WHA64.10 (2011) Strengthening national health emergency and disaster management capacities and resilience of health systems. Cites: WHA58.1, WHA59.22, WHA61.19. Cited by: WHA65.20, WHA69.19, WHA72.16, WHA74.15.
- WHA64.11 (2011) Preparations for the high-level meeting of the United Nations General Assembly on the prevention and control of noncommunicable diseases, following on the Moscow Conference. Cites: WHA53.17. Cited by: WHA65.3, WHA66.10.
- WHA64.12 (2011) WHO's role in the follow-up to the United Nations high-level plenary meeting of the General Assembly on the Millennium Development Goals (New York, September 2010). Cites: WHA61.18, WHA63.15, WHA63.24. Cited by: WHA65.7.
- WHA64.13 (2011) Working towards the reduction of perinatal and neonatal mortality. Cites: WHA58.31, WHA63.23. Cited by: WHA67.10.
- WHA64.14 (2011) Global health sector strategy on HIV/AIDS, 2011-2015. Cites: WHA53.14, WHA56.30, WHA59.12, WHA59.19, WHA63.19. Cited by: WHA69.22.
- WHA64.15 (2011) Cholera: mechanism for control and prevention. Cites: WHA44.6. Cited by: WHA67.12, WHA71.4.
- WHA64.16 (2011) Eradication of dracunculiasis. Cites: WHA39.21, WHA42.29, WHA44.5, WHA50.35, WHA57.9.
- WHA64.17 (2011) Malaria. Cites: WHA58.2, WHA60.18. Cited by: WHA68.2, WHA74.9.
- WHA64.18 (2011) Unaudited interim financial report on the accounts of WHO for the year 2010.
- WHA64.19 (2011) Status of collection of assessed contributions, including member states in arrears in the payment of their contributions to an extent that would justify invoking article 7 of the Constitution. Cites: WHA41.7, WHA61.8. Cited by: WHA65.11.
- WHA64.20 (2011) Special arrangements for settlement of arrears. Cited by: WHA67.5.
- WHA64.21 (2011) Scale of assessments for 2012-2013.
- WHA64.22 (2011) Amendments to the financial regulations. Cites: WHA60.9.
- WHA64.23 (2011) Appointment of the external auditor.
- WHA64.24 (2011) Drinking-water, sanitation and health. Cites: WHA35.17, WHA39.20, WHA42.25, WHA44.28, WHA45.31, WHA51.28, WHA63.23. Cited by: WHA67.12, WHA72.7.
- WHA64.25 (2011) Salaries of staff in ungraded posts and of the Director-General.
- WHA64.26 (2011) International Agency for Research on Cancer: amendments to statute.
- WHA64.27 (2011) Child injury prevention. Cites: WHA57.10, WHA58.23, WHA60.22.

Wernli, Falcone et al. BMJ Global Health, version 21.03.2023

- WHA64.28 (2011) Youth and health risks. Cites: WHA38.22, WHA42.41, WHA56.1, WHA56.21, WHA56.24, WHA57.12, WHA57.17, WHA59.19, WHA60.22, WHA61.14, WHA63.13, WHA63.14.
- WHA65.1 (2012) Appointment of the Director-General.
- WHA65.2 (2012) Contract of the Director-General.
- WHA65.3 (2012) Strengthening noncommunicable disease policies to promote active ageing. Cites: WHA52.7, WHA58.16, WHA64.11. Cited by: WHA69.3.
- WHA65.4 (2012) The global burden of mental disorders and the need for a comprehensive, coordinated response from health and social sectors at the country level. Cites: WHA55.10. Cited by: WHA66.10, WHA67.8.
- WHA65.5 (2012) Poliomyelitis: intensification of the global eradication initiative. Cites: WHA61.1. Cited by: WHA68.3, WHA71.16.
- WHA65.6 (2012) Maternal, infant and young child nutrition. Cites: WHA63.23. Cited by: WHA69.8, WHA69.9, WHA71.9.
- WHA65.7 (2012) Implementation of the recommendations of the Commission on Information and Accountability for Women's and Children's Health. Cites: WHA63.15, WHA64.12. Cited by: WHA66.7, WHA67.10.
- WHA65.8 (2012) Outcome of the World Conference on Social Determinants of Health. Cites: WHA62.14. Cited by: WHA66.10, WHA66.11, WHA67.12, WHA74.16.
- WHA65.9 (2012) Health conditions in the occupied Palestinian territory, including east Jerusalem, and in the occupied Syrian Golan.
- WHA65.10 (2012) Financial report and audited financial statements for the period 1 January 2010-31 December 2011.
- WHA65.11 (2012) Status of collection of assessed contributions, including Member States in arrears in the payment of their contributions to an extent that would justify invoking Article 7 of the Constitution. Cites: WHA41.7, WHA59.6, WHA64.19.
- WHA65.12 (2012) Special arrangements for settlement of arrears.
- WHA65.13 (2012) Report of the external auditor.
- WHA65.14 (2012) Salaries of staff in ungraded posts and of the Director-General.
- WHA65.15 (2012) Election of the Director-General of the World Health Organization: report of the working group.
- WHA65.16 (2012) Agreements with intergovernmental organizations.
- WHA65.17 (2012) Global vaccine action plan. Cites: WHA58.15, WHA61.15. Cited by: WHA68.6, WHA69.25, WHA70.14, WHA74.6.
- WHA65.18 (2012) World immunization week. Cites: WHA58.15, WHA61.15.
- WHA65.19 (2012) Substandard/spurious/falsely-labelled/falsified/counterfeit medical products. Cited by: WHA67.20, WHA69.25, WHA74.6.
- WHA65.20 (2012) WHO's response, and role as the health cluster lead, in meeting the growing demands of health in humanitarian emergencies. Cites: WHA34.26, WHA46.6, WHA46.39, WHA48.2, WHA55.13, WHA58.1, WHA59.22, WHA64.10. Cited by: WHA69.19, WHA70.6, WHA73.8, WHA74.7, WHA75.11.
- WHA65.21 (2012) Elimination of schistosomiasis. Cites: WHA3.26, WHA28.53, WHA29.58, WHA54.19.
- WHA65.22 (2012) Follow-up of the report of the Consultative Expert Working Group on Research and Development: financing and coordination. Cites: WHA59.24, WHA61.21, WHA62.16, WHA63.28. Cited by: WHA66.22.
- WHA65.23 (2012) Implementation of the International Health Regulations (2005). Cites: WHA58.3, WHA61.2, WHA64.1.
- WHA66.1 (2013) Twelfth General Programme of Work, 2014–2019.
- WHA66.2 (2013) Programme budget 2014–2015.
- WHA66.3 (2013) Amendments to the Financial Regulations and Financial Rules.
- WHA66.4 (2013) Towards universal eye health: a global action plan 2014–2019. Cites: WHA56.26, WHA59.25, WHA62.1. Cited by: WHA71.8, WHA73.4.



Wernli, Falcone et al. BMJ Global Health, version 21.03.2023

- WHA66.5 (2013) Health conditions in the occupied Palestinian territory, including east Jerusalem, and in the occupied Syrian Golan.
- WHA66.6 (2013) Financial report and audited financial statements for the period 1 January 2012–31 December 2012.
- WHA66.7 (2013) Implementation of the recommendations of the United Nations Commission on Life-Saving Commodities for Women and Children. Cites: WHA63.15, WHA65.7.
- WHA66.8 (2013) Comprehensive mental health action plan 2013–2020. Cited by: WHA67.8, WHA68.20, WHA72.16, WHA73.10.
- WHA66.9 (2013) Disability. Cites: WHA58.23. Cited by: WHA67.8, WHA74.8.
- WHA66.10 (2013) Follow-up to the Political Declaration of the High-level Meeting of the General Assembly on the Prevention and Control of Non-communicable Diseases. Cites: WHA57.17, WHA63.13, WHA63.14, WHA64.11, WHA65.4, WHA65.8. Cited by: WHA67.6, WHA67.22, WHA68.15, WHA69.6, WHA70.11, WHA70.12, WHA71.6, WHA71.14, WHA73.2, WHA74.4.
- WHA66.11 (2013) Health in the post-2015 UN development agenda. Cites: WHA65.8. Cited by: WHA67.14, WHA69.11.
- WHA66.12 (2013) Neglected tropical diseases. Cited by: WHA68.20, WHA73.4.
- WHA66.13 (2013) Status of collection of assessed contributions, including Member States in arrears in the payment of their contributions to an extent that would justify invoking Article 7 of the Constitution. Cites: WHA41.7, WHA59.6, WHA61.8.
- WHA66.14 (2013) Special arrangements for settlement of arrears: Tajikistan.
- WHA66.15 (2013) Scale of assessments for 2014–2015.
- WHA66.16 (2013) Foreign exchange risk management.
- WHA66.17 (2013) Report of the External Auditor.
- WHA66.18 (2013) Follow-up of the report of the Working Group on the Election of the Director-General of the World Health Organization.
- WHA66.19 (2013) Real estate.
- WHA66.20 (2013) Agreement between the World Health Organization and the South Centre.
- WHA66.21 (2013) Reassignment of South Sudan from the Eastern Mediterranean Region to the African Region. Cites: WHA49.6.
- WHA66.22 (2013) Follow up of the report of the Consultative Expert Working Group on Research and Development: Financing and Coordination. Cites: WHA59.24, WHA63.21, WHA63.28, WHA65.22. Cited by: WHA67.25, WHA68.7, WHA69.23, WHA74.6, WHA75.8.
- WHA66.23 (2013) Transforming health workforce education in support of universal health coverage. Cites: WHA59.23, WHA63.16, WHA64.9. Cited by: WHA67.24, WHA69.19, WHA69.24, WHA70.6.
- WHA66.24 (2013) eHealth standardization and interoperability. Cites: WHA58.28. Cited by: WHA71.7.
- WHA67.1 (2014) Global strategy and targets for tuberculosis prevention, care and control after 2015. Cites: WHA60.19, WHA61.17, WHA62.15. Cited by: WHA71.3, WHA73.3.
- WHA67.2 (2014) Improved decision-making by the governing bodies.
- WHA67.3 (2014) Financial report and audited financial statements for the year ended 31 December 2013.
- WHA67.4 (2014) Supplementary funding for real estate and longer-term staff liabilities.
- WHA67.5 (2014) Status of collection of assessed contributions, including Member States in arrears in the payment of their contributions to an extent that would justify invoking Article 7 of the Constitution. Cites: WHA41.7, WHA64.20.
- WHA67.6 (2014) Hepatitis. Cites: WHA28.72, WHA45.17, WHA58.13, WHA61.21, WHA63.18, WHA66.10. Cited by: WHA69.22.
- WHA67.7 (2014) Disability. Cited by: WHA71.8, WHA74.8.
- WHA67.8 (2014) Autism. Cites: WHA65.4, WHA66.8, WHA66.9.
- WHA67.9 (2014) Psoriasis.
- WHA67.10 (2014) Newborn health action plan. Cites: WHA58.31, WHA63.15, WHA64.9, WHA64.13, WHA65.7. Cited by: WHA68.20, WHA73.10.

Wernli, Falcone et al. BMJ Global Health, version 21.03.2023

- WHA67.11 (2014) Public health impacts of exposure to mercury and mercury compounds: the role of WHO and ministries of public health in the implementation of the Minamata Convention. Cites: WHA59.15, WHA60.17, WHA63.25. Cited by: WHA69.4.
- WHA67.12 (2014) Contributing to social and economic development: sustainable action across sectors to improve health and health equity. Cites: WHA42.44, WHA51.12, WHA57.16, WHA59.15, WHA60.24, WHA61.19, WHA63.25, WHA63.26, WHA64.15, WHA64.24, WHA65.8.
- WHA67.13 (2014) Implementation of the International Health Regulations (2005). Cited by: WHA68.4.
- WHA67.14 (2014) Health in the post-2015 development agenda. Cites: WHA62.14, WHA63.16, WHA66.11. Cited by: WHA69.11.
- WHA67.15 (2014) Strengthening the role of the health system in addressing violence, in particular against women and girls, and against children. Cites: WHA49.25, WHA56.24, WHA61.16. Cited by: WHA68.20, WHA74.17.
- WHA67.16 (2014) Report of the External Auditor.
- WHA67.17 (2014) Salaries of staff in ungraded posts and of the Director-General.
- WHA67.18 (2014) Traditional medicine. Cites: WHA22.54, WHA29.72, WHA30.49, WHA31.33, WHA40.33, WHA41.19, WHA42.43, WHA44.34, WHA54.11, WHA56.31, WHA61.21, WHA62.13. Cited by: WHA69.24.
- WHA67.19 (2014) Strengthening of palliative care as a component of comprehensive care throughout the life course. Cites: WHA58.22. Cited by: WHA68.15, WHA69.3, WHA69.19, WHA70.6, WHA70.12.
- WHA67.20 (2014) Regulatory system strengthening for medical products. Cites: WHA45.17, WHA47.17, WHA52.19, WHA54.11, WHA59.24, WHA63.12, WHA65.19. Cited by: WHA68.6, WHA69.20, WHA69.24, WHA69.25, WHA74.6, WHA75.8.
- WHA67.21 (2014) Access to biotherapeutic products including similar biotherapeutic products and ensuring their quality, safety and efficacy. Cites: WHA55.14. Cited by: WHA69.24, WHA69.25, WHA74.6.
- WHA67.22 (2014) Access to essential medicines. Cites: WHA28.66, WHA54.11, WHA58.27, WHA60.16, WHA60.20, WHA60.29, WHA61.21, WHA64.9, WHA66.10. Cited by: WHA68.20, WHA69.20, WHA69.24, WHA69.25, WHA73.10, WHA74.6.
- WHA67.23 (2014) Health intervention and technology assessment in support of universal health coverage. Cites: WHA52.19, WHA58.33, WHA60.16, WHA60.29, WHA63.21, WHA64.9. Cited by: WHA69.24, WHA70.14, WHA75.8.
- WHA67.24 (2014) Follow-up of the Recife Political Declaration on Human Resources for Health: renewed commitments towards universal health coverage. Cites: WHA63.16, WHA66.23. Cited by: WHA69.19, WHA70.6.
- WHA67.25 (2014) Antimicrobial resistance. Cites: WHA39.27, WHA47.13, WHA51.17, WHA54.14, WHA58.27, WHA60.16, WHA66.22. Cited by: WHA68.7, WHA68.15, WHA69.25, WHA70.7.
- WHA68.1 (2015) Programme budget 2016–2017.
- WHA68.2 (2015) Global technical strategy and targets for malaria 2016–2030. Cites: WHA58.2, WHA60.18, WHA64.17. Cited by: WHA74.9.
- WHA68.3 (2015) Poliomyelitis. Cites: WHA59.1, WHA65.5. Cited by: WHA71.16.
- WHA68.4 (2015) Yellow fever risk mapping and recommended vaccination for travellers. Cites: WHA67.13.
- WHA68.5 (2015) The recommendations of the Review Committee on Second Extensions for Establishing National Public Health Capacities and on IHR Implementation.
- WHA68.6 (2015) Global vaccine action plan. Cites: WHA54.11, WHA58.15, WHA61.15, WHA61.21, WHA65.17, WHA67.20. Cited by: WHA70.14.
- WHA68.7 (2015) Global action plan on antimicrobial resistance. Cites: WHA39.27, WHA47.13, WHA51.17, WHA54.14, WHA58.27, WHA60.16, WHA66.22, WHA67.25. Cited by: WHA69.25, WHA70.7, WHA71.3, WHA71.14, WHA72.5, WHA72.7, WHA74.6.
- WHA68.8 (2015) Health and the environment: addressing the health impact of air pollution. Cites: WHA61.19. Cited by: WHA69.4.
- WHA68.9 (2015) Framework of engagement with non-State actors. Cited by: WHA69.10.

Wernli, Falcone et al. BMJ Global Health, version 21.03.2023

- WHA68.10 (2015) Financial report and audited financial statements for the year ended 31 December 2014.
- WHA68.11 (2015) Status of collection of assessed contributions, including Member States in arrears in the payment of their contributions to an extent that would justify invoking Article 7 of the Constitution. Cites: WHA41.7, WHA61.8.
- WHA68.12 (2015) Scale of assessments for 2016–2017.
- WHA68.13 (2015) Report of the External Auditor.
- WHA68.14 (2015) Appointment of the External Auditor.
- WHA68.15 (2015) Strengthening emergency and essential surgical care and anaesthesia as a component of universal health coverage. Cites: WHA55.18, WHA56.24, WHA57.10, WHA58.23, WHA60.22, WHA64.6, WHA66.10, WHA67.19, WHA67.25. Cited by: WHA69.19, WHA70.6, WHA72.16.
- WHA68.16 (2015) Salaries of staff in ungraded posts and of the Director-General.
- WHA68.17 (2015) Amendments to the Staff Regulations.
- WHA68.18 (2015) Global strategy and plan of action on public health, innovation and intellectual property. Cites: WHA61.21, WHA62.16. Cited by: WHA75.14.
- WHA68.19 (2015) Outcome of the Second International Conference on Nutrition. Cited by: WHA69.8, WHA71.9.
- WHA68.20 (2015) Global burden of epilepsy and the need for coordinated action at the country level to address its health, social and public knowledge implications. Cites: WHA57.10, WHA66.8, WHA66.12, WHA67.10, WHA67.15, WHA67.22. Cited by: WHA73.10.
- WHA69.1 (2016) Strengthening essential public health functions in support of the achievement of universal health coverage. Cites: WHA58.3, WHA62.12, WHA64.9. Cited by: WHA72.16, WHA74.14, WHA75.13.
- WHA69.2 (2016) Committing to implementation of the Global Strategy for Women's, Children's and Adolescents' Health. Cited by: WHA71.14, WHA73.2.
- WHA69.3 (2016) The Global strategy and action plan on ageing and health 2016–2020: towards a world in which everyone can live a long and healthy life. Cites: WHA52.7, WHA58.16, WHA64.9, WHA65.3, WHA67.19. Cited by: WHA71.8, WHA74.5.
- WHA69.4 (2016) The role of the health sector in the Strategic Approach to International Chemicals Management towards the 2020 goal and beyond. Cites: WHA59.15, WHA63.25, WHA63.26, WHA67.11, WHA68.8.
- WHA69.5 (2016) WHO global plan of action to strengthen the role of the health system within a national multisectoral response to address interpersonal violence, in particular against women and girls, and against children. Cited by: WHA74.17.
- WHA69.6 (2016) Prevention and control of noncommunicable diseases: responses to specific assignments in preparation for the third High-level Meeting of the United Nations General Assembly on the Prevention and Control of Non-communicable Diseases in 2018. Cites: WHA66.10. Cited by: WHA70.11.
- WHA69.7 (2016) Addressing the challenges of the United Nations Decade of Action for Road Safety (2011–2020): outcome of the second Global High-level Conference on Road Safety – Time for Results. Cites: WHA57.10, WHA60.22.
- WHA69.8 (2016) United Nations Decade of Action on Nutrition (2016–2025). Cites: WHA65.6, WHA68.19. Cited by: WHA71.9.
- WHA69.9 (2016) Ending inappropriate promotion of foods for infants and young children. Cites: WHA33.32, WHA34.22, WHA35.26, WHA37.30, WHA39.28, WHA41.11, WHA43.3, WHA45.34, WHA46.7, WHA47.5, WHA49.15, WHA54.2, WHA55.25, WHA58.32, WHA59.21, WHA61.20, WHA63.23, WHA65.6. Cited by: WHA71.9.
- WHA69.10 (2016) Framework of engagement with non-State actors. Cites: WHA40.25, WHA64.2, WHA68.9.
- WHA69.11 (2016) Health in the 2030 Agenda for Sustainable Development. Cites: WHA61.21, WHA62.16, WHA66.11, WHA67.14. Cited by: WHA72.2, WHA72.4, WHA73.4, WHA74.15.

Wernli, Falcone et al. BMJ Global Health, version 21.03.2023

- WHA69.12 (2016) WHO programmatic and financial report for 2014–2015 including audited financial statements for 2015.
- WHA69.13 (2016) Status of collection of assessed contributions, including Member States in arrears in the payment of their contributions to an extent that would justify invoking Article 7 of the Constitution. Cites: WHA41.7.
- WHA69.14 (2016) Scale of assessments for 2017.
- WHA69.15 (2016) Report of the External Auditor.
- WHA69.16 (2016) Salaries of staff in ungraded posts and of the Director-General.
- WHA69.17 (2016) Amendments to the Staff Regulations: dispute resolution.
- WHA69.18 (2016) Process for the election of the Director-General of the World Health Organization.
- WHA69.19 (2016) Global strategy on human resources for health: workforce 2030. Cites: WHA62.12, WHA62.13, WHA63.16, WHA64.6, WHA64.7, WHA64.8, WHA64.9, WHA64.10, WHA65.20, WHA66.23, WHA67.19, WHA67.24, WHA68.15. Cited by: WHA70.6, WHA72.3, WHA74.14, WHA74.15.
- WHA69.20 (2016) Promoting innovation and access to quality, safe, efficacious and affordable medicines for children. Cites: WHA60.20, WHA67.20, WHA67.22.
- WHA69.21 (2016) Addressing the burden of mycetoma.
- WHA69.22 (2016) Global health sector strategies on HIV, viral hepatitis and sexually transmitted infections, for the period 2016–2021. Cites: WHA59.19, WHA63.18, WHA64.14, WHA67.6. Cited by: WHA73.2.
- WHA69.23 (2016) Follow-up of the report of the Consultative Expert Working Group on Research and Development: Financing and Coordination. Cites: WHA66.22. Cited by: WHA75.8.
- WHA69.24 (2016) Strengthening integrated, people-centred health services. Cites: WHA60.27, WHA62.12, WHA63.16, WHA64.7, WHA64.9, WHA66.23, WHA67.18, WHA67.20, WHA67.21, WHA67.22, WHA67.23.
- WHA69.25 (2016) Addressing the global shortage of medicines and vaccines. Cites: WHA60.20, WHA61.21, WHA64.9, WHA65.17, WHA65.19, WHA67.20, WHA67.21, WHA67.22, WHA67.25, WHA68.7. Cited by: WHA71.14.
- WHA70.1 (2017) Arrears in payment of contributions: Somalia. Cites: WHA54.6.
- WHA70.2 (2017) Appointment of the Director-General.
- WHA70.3 (2017) Contract of the Director-General.
- WHA70.4 (2017) Expression of appreciation to Dr Margaret Chan.
- WHA70.5 (2017) Programme budget 2018–2019.
- WHA70.6 (2017) Human resources for health and implementation of the outcomes of the United Nations' High-Level Commission on Health Employment and Economic Growth. Cites: WHA63.16, WHA64.6, WHA64.7, WHA65.20, WHA66.23, WHA67.19, WHA67.24, WHA68.15, WHA69.19. Cited by: WHA72.3, WHA74.14, WHA75.17.
- WHA70.7 (2017) Improving the prevention, diagnosis and clinical management of sepsis. Cites: WHA45.17, WHA67.25, WHA68.7. Cited by: WHA72.7, WHA73.9, WHA75.13.
- WHA70.8 (2017) Status of collection of assessed contributions, including Member States in arrears in the payment of their contributions to an extent that would justify invoking Article 7 of the Constitution. Cites: WHA41.7.
- WHA70.9 (2017) Scale of assessments for 2018–2019.
- WHA70.10 (2017) Salaries of staff in ungraded posts and of the Director-General.
- WHA70.11 (2017) Preparation for the third High-level Meeting of the General Assembly on the Prevention and Control of Non-communicable Diseases, to be held in 2018. Cites: WHA66.10, WHA69.6.
- WHA70.12 (2017) Cancer prevention and control in the context of an integrated approach. Cites: WHA58.22, WHA66.10, WHA67.19. Cited by: WHA72.8, WHA73.2.
- WHA70.13 (2017) Prevention of deafness and hearing loss. Cites: WHA48.9, WHA58.23. Cited by: WHA71.8, WHA73.9.

Wernli, Falcone et al. BMJ Global Health, version 21.03.2023

- WHA70.14 (2017) Strengthening immunization to achieve the goals of the global vaccine action plan. Cites: WHA65.17, WHA67.23, WHA68.6. Cited by: WHA73.9.
- WHA70.15 (2017) Promoting the health of refugees and migrants. Cites: WHA61.17.
- WHA70.16 (2017) Global vector control response: an integrated approach for the control of vector-borne diseases.
- WHA71.1 (2018) Thirteenth General Programme of Work, 2019–2023. Cited by: WHA72.4, WHA72.16, WHA73.9.
- WHA71.2 (2018) Preparation for the third High-level Meeting of the General Assembly on the Prevention and Control of Non-communicable Diseases, to be held in 2018.
- WHA71.3 (2018) Preparation for a high-level meeting of the General Assembly on ending tuberculosis. Cites: WHA67.1, WHA68.7. Cited by: WHA73.3.
- WHA71.4 (2018) Cholera prevention and control. Cites: WHA64.15. Cited by: WHA72.7.
- WHA71.5 (2018) Addressing the burden of snakebite envenoming.
- WHA71.6 (2018) WHO global action plan on physical activity 2018–2030. Cites: WHA51.18, WHA53.17, WHA55.23, WHA57.17, WHA66.10.
- WHA71.7 (2018) Digital health. Cites: WHA58.28, WHA66.24.
- WHA71.8 (2018) Improving access to assistive technology. Cites: WHA66.4, WHA67.7, WHA69.3, WHA70.13. Cited by: WHA74.6, WHA74.8.
- WHA71.9 (2018) Infant and young child feeding. Cites: WHA33.32, WHA34.22, WHA35.26, WHA37.30, WHA39.28, WHA41.11, WHA43.3, WHA45.34, WHA46.7, WHA47.5, WHA49.15, WHA54.2, WHA55.25, WHA58.32, WHA59.21, WHA61.20, WHA63.23, WHA65.6, WHA68.19, WHA69.8, WHA69.9.
- WHA71.10 (2018) Status of collection of assessed contributions, including Member States in arrears in the payment of their contributions to an extent that would justify invoking Article 7 of the Constitution. Cites: WHA41.7.
- WHA71.11 (2018) Deputy Directors-General.
- WHA71.12 (2018) Salaries of staff in ungraded positions and of the Director-General.
- WHA71.13 (2018) Reform of the global internship programme.
- WHA71.14 (2018) Rheumatic fever and rheumatic heart disease. Cites: WHA66.10, WHA68.7, WHA69.2, WHA69.25.
- WHA71.15 (2018) Multilingualism: respect for equality among the official languages. Cites: WHA50.32, WHA51.30.
- WHA71.16 (2018) Poliomyelitis – containment of polioviruses. Cites: WHA65.5, WHA68.3.
- WHA72.1 (2019) Programme budget 2020–2021.
- WHA72.2 (2019) Primary health care. Cites: WHA69.11. Cited by: WHA73.10, WHA74.5.
- WHA72.3 (2019) Community health workers delivering primary health care: opportunities and challenges. Cites: WHA69.19, WHA70.6. Cited by: WHA74.8.
- WHA72.4 (2019) Preparation for the high-level meeting of the United Nations General Assembly on universal health coverage. Cites: WHA69.11, WHA71.1.
- WHA72.5 (2019) Antimicrobial resistance. Cites: WHA68.7.
- WHA72.6 (2019) Global action on patient safety. Cites: WHA55.18. Cited by: WHA75.13.
- WHA72.7 (2019) Water, sanitation and hygiene in health care facilities. Cites: WHA35.17, WHA39.20, WHA42.25, WHA44.28, WHA45.31, WHA51.28, WHA63.23, WHA64.24, WHA68.7, WHA70.7, WHA71.4. Cited by: WHA75.13.
- WHA72.8 (2019) Improving the transparency of markets for medicines, vaccines, and other health products. Cites: WHA70.12. Cited by: WHA74.6, WHA75.14.
- WHA72.9 (2019) Status of collection of assessed contributions, including Member States in arrears in the payment of their contributions to an extent that would justify invoking Article 7 of the Constitution. Cites: WHA41.7.
- WHA72.10 (2019) Special arrangements for settlement of arrears: Central African Republic. Cites: WHA54.6.
- WHA72.11 (2019) Appointment of the External Auditor.

Wernli, Falcone et al. BMJ Global Health, version 21.03.2023

- WHA72.12 (2019) Scale of assessments for 2020–2021.
- WHA72.13 (2019) Salaries of staff in ungraded positions and of the Director-General.
- WHA72.14 (2019) Special arrangements for settlement of arrears: Bolivarian Republic of Venezuela. Cites: WHA54.6.
- WHA72.15 (2019) Eleventh revision of the International Classification of Diseases. Cites: WHA20.18, WHA43.24.
- WHA72.16 (2019) Emergency care systems for universal health coverage: ensuring timely care for the acutely ill and injured. Cites: WHA56.24, WHA57.10, WHA60.22, WHA64.10, WHA66.8, WHA68.15, WHA69.1, WHA71.1.
- WHA73.1 (2020) COVID-19 response. Cited by: WHA74.6, WHA74.7, WHA74.14, WHA74.15, WHA75.7, WHA75.13.
- WHA73.2 (2020) Global strategy to accelerate the elimination of cervical cancer as a public health problem and its associated goals and targets for the period 2020–2030. Cites: WHA66.10, WHA69.2, WHA69.22, WHA70.12.
- WHA73.3 (2020) Global strategy for tuberculosis research and innovation. Cites: WHA67.1, WHA71.3.
- WHA73.4 (2020) Integrated people-centred eye care, including preventable vision impairment and blindness. Cites: WHA51.11, WHA56.26, WHA59.25, WHA62.1, WHA66.4, WHA66.12, WHA69.11.
- WHA73.5 (2020) Strengthening efforts on food safety. Cites: WHA53.15, WHA63.3.
- WHA73.6 (2020) Evaluation of the election of the Director-General of the World Health Organization: amendments to contract.
- WHA73.7 (2020) Salaries of staff in ungraded posts and of the Director-General.
- WHA73.8 (2020) Strengthening preparedness for health emergencies: implementation of the International Health Regulations (2005). Cites: WHA58.3, WHA65.20. Cited by: WHA74.7, WHA75.7, WHA75.13.
- WHA73.9 (2020) Global road map on defeating meningitis by 2030. Cites: WHA70.7, WHA70.13, WHA70.14, WHA71.1.
- WHA73.10 (2020) Global actions on epilepsy and other neurological disorders. Cites: WHA57.17, WHA62.12, WHA66.8, WHA67.10, WHA67.22, WHA68.20, WHA72.2.
- WHA74.1 (2021) Status of collection of assessed contributions, including Member States in arrears in the payment of their contributions to an extent that would justify invoking Article 7 of the Constitution.
- WHA74.2 (2021) Admission of the Faroe Islands as an Associate Member.
- WHA74.3 (2021) Programme budget 2022–2023. Cited by: WHA75.5, WHA75.6.
- WHA74.4 (2021) Reducing the burden of noncommunicable diseases through strengthening prevention and control of diabetes. Cites: WHA66.10.
- WHA74.5 (2021) Oral health. Cites: WHA60.17, WHA69.3, WHA72.2.
- WHA74.6 (2021) Strengthening local production of medicines and other health technologies to improve access. Cites: WHA60.20, WHA61.21, WHA62.16, WHA63.12, WHA65.17, WHA65.19, WHA66.22, WHA67.20, WHA67.21, WHA67.22, WHA68.7, WHA71.8, WHA72.8, WHA73.1. Cited by: WHA75.8.
- WHA74.7 (2021) Strengthening WHO preparedness for and response to health emergencies. Cites: WHA58.3, WHA65.20, WHA73.1, WHA73.8. Cited by: WHA75.5, WHA75.7, WHA75.8, WHA75.13.
- WHA74.8 (2021) The highest attainable standard of health for persons with disabilities. Cites: WHA58.23, WHA66.9, WHA67.7, WHA71.8, WHA72.3.
- WHA74.9 (2021) Recommitting to accelerate progress towards malaria elimination. Cites: WHA8.30, WHA58.2, WHA60.18, WHA64.17, WHA68.2.
- WHA74.10 (2021) Salaries of staff in ungraded positions and of the Director-General.
- WHA74.11 (2021) Agreement between the World Health Organization and the International Organisation of La Francophonie.
- WHA74.12 (2021) Participation of the Holy See in the World Health Organization.
- WHA74.13 (2021) Scale of assessments 2022–2023.



Wernli, Falcone et al. BMJ Global Health, version 21.03.2023

- WHA74.14 (2021) Protecting, safeguarding and investing in the health and care workforce. Cites: WHA63.16, WHA69.1, WHA69.19, WHA70.6, WHA73.1. Cited by: WHA75.17.
- WHA74.15 (2021) Strengthening nursing and midwifery: investments in education, jobs, leadership and service delivery. Cites: WHA42.27, WHA45.5, WHA49.1, WHA54.12, WHA59.27, WHA63.16, WHA64.7, WHA64.10, WHA69.11, WHA69.19, WHA73.1.
- WHA74.16 (2021) Social determinants of health. Cites: WHA62.14, WHA65.8.
- WHA74.17 (2021) Ending violence against children through health systems strengthening and multisectoral approaches. Cites: WHA49.25, WHA56.24, WHA61.16, WHA67.15, WHA69.5.
- WHA75.1 (2022) Special arrangements for settlement of arrears: Islamic Republic of Iran. Cites: WHA54.6.
- WHA75.2 (2022) Special arrangements for settlement of arrears: Sudan. Cites: WHA54.6.
- WHA75.3 (2022) Appointment of the Director-General.
- WHA75.4 (2022) Contract of the Director-General.
- WHA75.5 (2022) Revision of the Programme budget 2022–2023. Cites: WHA74.3, WHA74.7.
- WHA75.6 (2022) Extending the Thirteenth General Programme of Work, 2019–2023 to 2025. Cites: WHA74.3.
- WHA75.7 (2022) Strengthening health emergency preparedness and response in cities and urban settings. Cites: WHA73.1, WHA73.8, WHA74.7.
- WHA75.8 (2022) Strengthening clinical trials to provide high-quality evidence on health interventions and to improve research quality and coordination. Cites: WHA58.34, WHA63.21, WHA66.22, WHA67.20, WHA67.23, WHA69.23, WHA74.6, WHA74.7.
- WHA75.9 (2022) Scale of assessments 2022–2023.
- WHA75.10 (2022) Status of collection of assessed contributions, including Member States in arrears in the payment of their contributions to an extent that would justify invoking Article 7 of the Constitution. Cites: WHA41.7.
- WHA75.11 (2022) Health emergency in Ukraine and refugee-receiving and -hosting countries, stemming from the Russian Federation's aggression. Cites: WHA65.20.
- WHA75.12 (2022) Amendments to the International Health Regulations (2005).
- WHA75.13 (2022) Global strategy on infection prevention and control. Cites: WHA48.7, WHA58.27, WHA69.1, WHA70.7, WHA72.6, WHA72.7, WHA73.1, WHA73.8, WHA74.7.
- WHA75.14 (2022) Global strategy and plan of action on public health, innovation and intellectual property. Cites: WHA61.21, WHA62.16, WHA68.18, WHA72.8.
- WHA75.15 (2022) Salaries of staff in ungraded positions and of the Director-General.
- WHA75.16 (2022) Agreement between the World Health Organization and the International Development Law Organization.
- WHA75.17 (2022) Human resources for health. Cites: WHA63.16, WHA70.6, WHA74.14.
- WHA75.18 (2022) Outcome of the SIDS Summit for Health: For a Healthy and Resilient Future in Small Island Developing States.
- WHA75.19 (2022) Well-being and health promotion.
- WHA75.20 (2022) The global health sector strategies on, respectively, HIV, viral hepatitis and sexually transmitted infections.

Wernli, Falcone et al. BMJ Global Health, version 21.03.2023

**Supplementary material 4 – Plot showing the cited year as a function of the year of adoption.**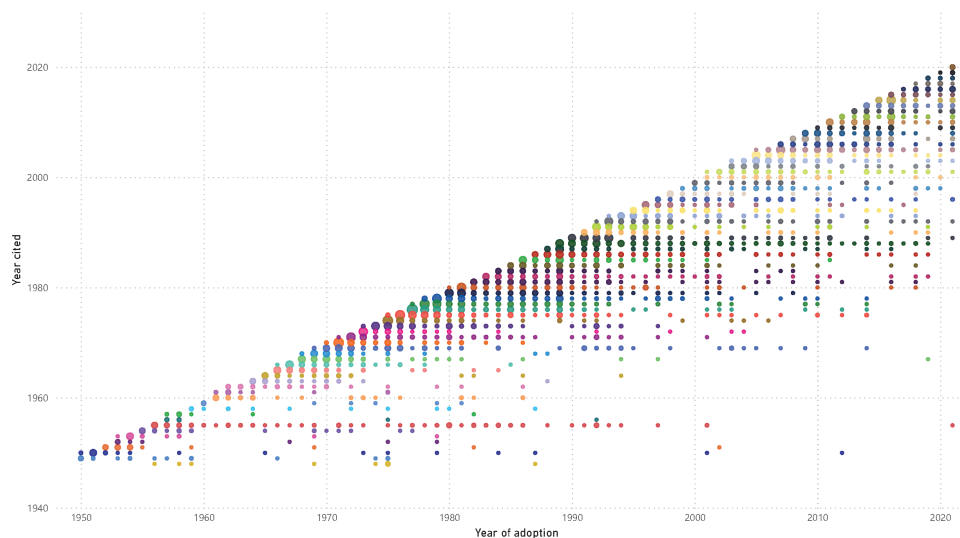

The size of the marker is proportional to the number of cited resolutions for a given year.

**Supplementary material 5 – Visualization of the network of WHA resolutions at different timepoint**

Nodes are at fixed positions over the years. The visualization uses the ‘Prefused Force Directed Layout’ in Cytoscape which is based on the force directed paradigm (Fruchterman TM, Reingold EM. Graph drawing by force-directed placement. Software: Practice and experience 1991;21(11):1129-64.)

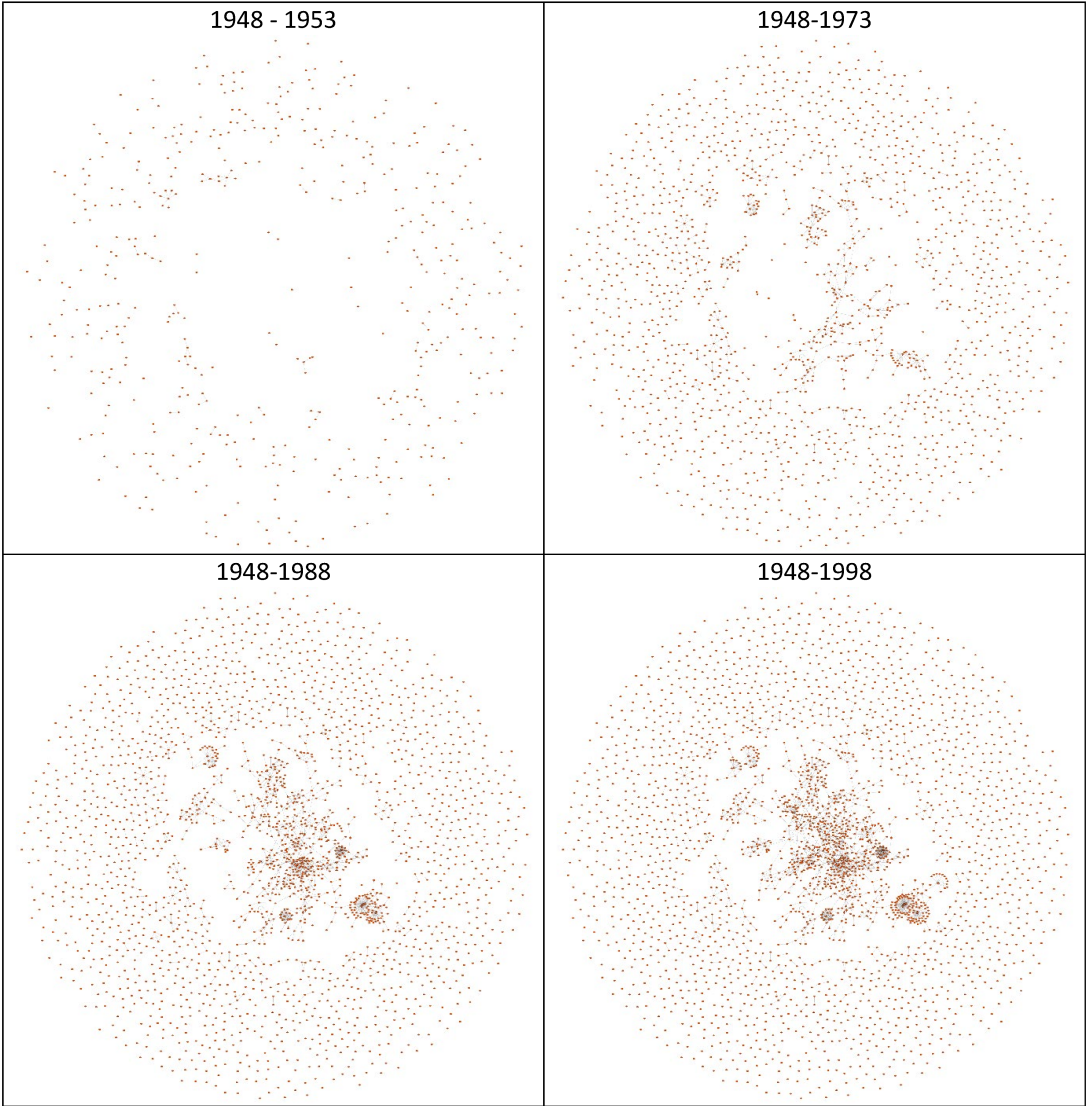

Wernli, Falcone et al. BMJ Global Health, version 21.03.2023

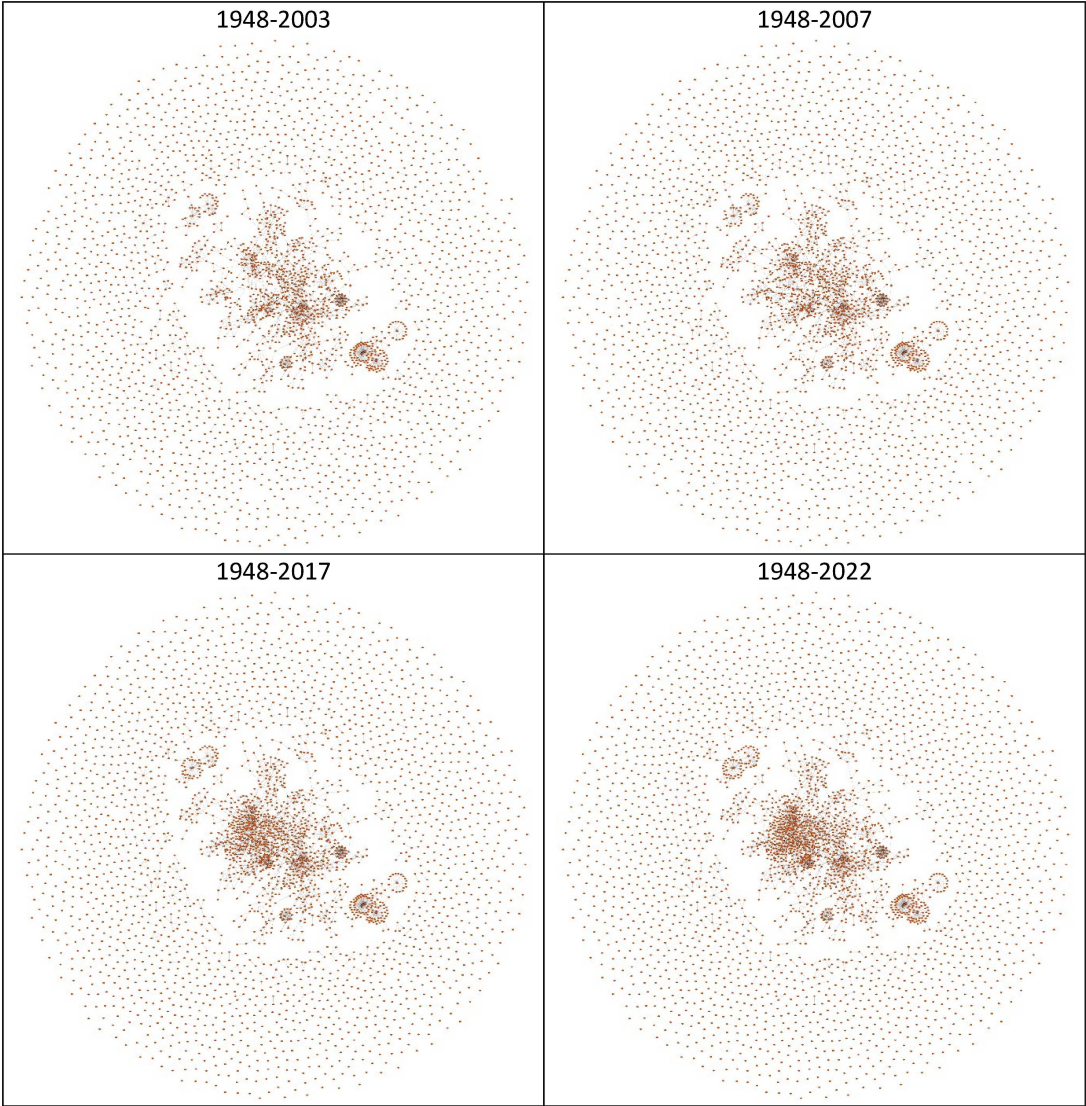

Wernli, Falcone et al. BMJ Global Health, version 21.03.2023

Supplementary material 6 – Evolution of the global clustering coefficient from 1948 to 2022

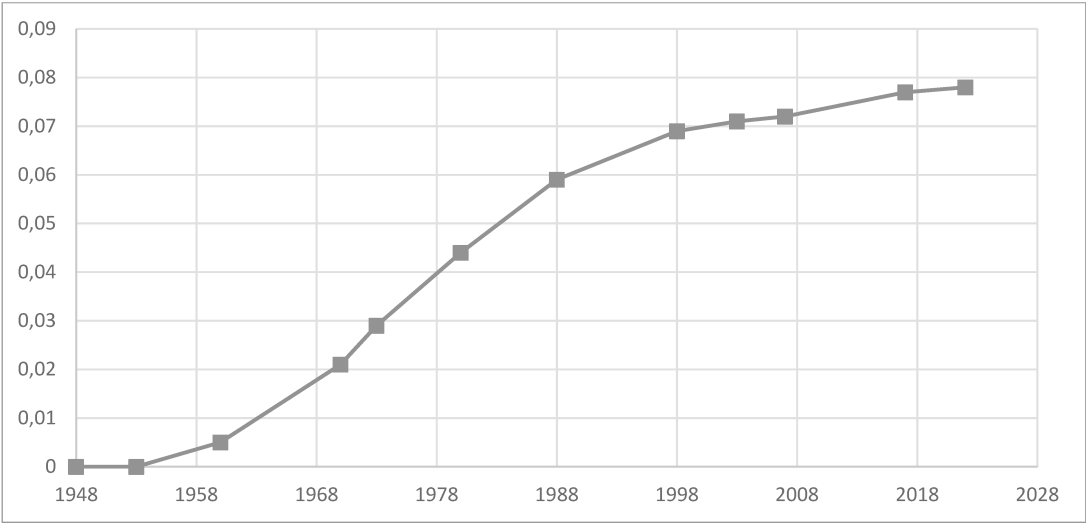

Supplementary material 7 – Distribution of clusters which are not part of the giant component

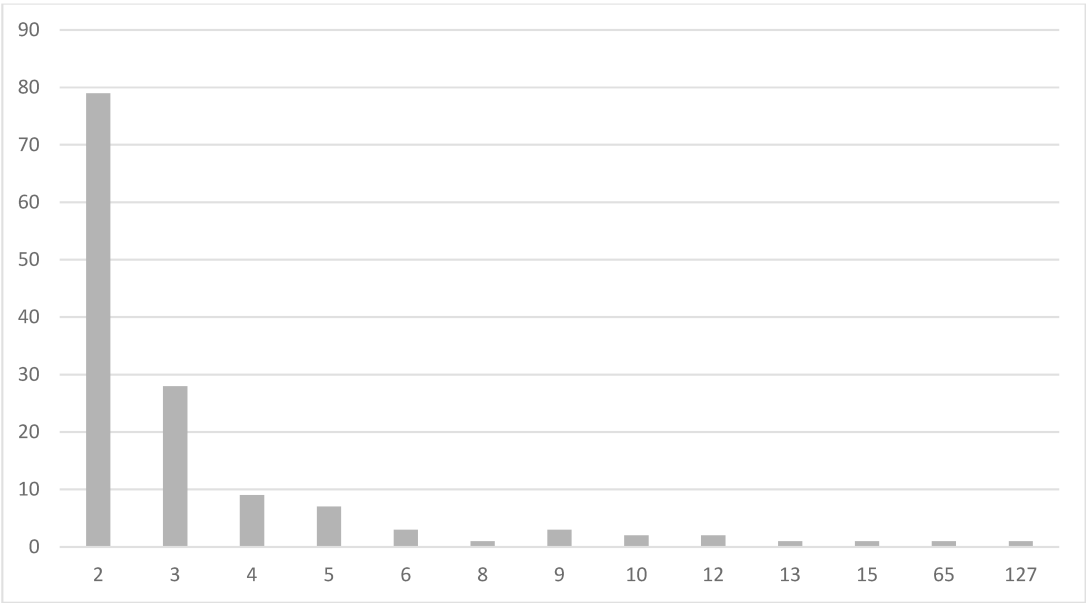

Wernli, Falcone et al. BMJ Global Health, version 21.03.2023

## Supplementary material 8 – Community detection: examples of chain and chain-like components

We define a chain as at least three resolutions where one resolution connects only two nodes which are not directly or indirectly connected. A pure chain has Number of edges  $N_e = N_n - 1$ . Where  $N_n$  is the number of nodes. In addition, chain-like components include patterns that reassemble a chain but might have redundancies (cf. supplementary material 9 for an example) and or connection to other nodes. We used the PathExplorer plugin in Cytoscape (version 1.1, available from <https://apps.cytoscape.org/apps/pathexplorer>) and selected nodes that appears to be at the start or the end of a chain (or chain-like behaviour to select the path and create a subnetwork). To qualify as a chain or a chain-like component, we considered only edges going in the same direction (except from the starting point of the network).

| Topic and period                                                                                                | Nb of nodes;<br>nb of edges | Resolutions which are parts of the chain*                                                                                                                                                                                                                                                                      | Part of<br>the GC |
|-----------------------------------------------------------------------------------------------------------------|-----------------------------|----------------------------------------------------------------------------------------------------------------------------------------------------------------------------------------------------------------------------------------------------------------------------------------------------------------|-------------------|
| Leprosy (1974-1998)                                                                                             | 9; 9<br>Chain-like          | <u>WHA27.58</u> , WHA28.56, WHA29.70, WHA30.36, WHA32.16, WHA32.39, WHA40.35, WHA44.9, WHA51.15                                                                                                                                                                                                                | Yes               |
| Cardiovascular diseases (1965 – 1989)                                                                           | 8; 9<br>Chain-like          | <u>WHA18.43</u> , WHA19.34, WHA19.38, WHA25.44, WHA29.49, WHA36.32, WHA38.30, WHA42.35                                                                                                                                                                                                                         | Yes               |
| Agreement with the United Nations Relief and Works Agency for Palestine refugees in the Near East (1951 – 1969) | 10; 9<br>Chain              | <u>WHA4.15</u> , WHA5.72, WHA6.25, WHA7.11, WHA8.46, WHA13.62, WHA16.41, WHA18.24, WHA19.25, WHA22.25                                                                                                                                                                                                          | No                |
| Recruitment of international staff in WHO (1979 – 2003)                                                         | 13; 13<br>Chain-like        | WHA1.43, WHA4.51, WHA4.14, WHA13.49, WHA17.20, WHA18.33, WHA19.30, WHA20.48, WHA20.22, WHA20.53, WHA21.49, WHA21.32, WHA21.33, WHA23.61, WHA28.40, WHA29.43, WHA32.37, WHA33.30, WHA34.15, WHA35.10, WHA36.19, WHA38.12, WHA40.10, WHA42.12, WHA44.23, WHA46.23, WHA48.28, WHA50.15, WHA55.24, <u>WHA56.35</u> | Yes               |
| Headquarter accommodation (1959 – 1970)                                                                         | 6; 5<br>Chain               | <u>WHA12.12</u> , WHA13.46, WHA16.22, WHA18.28, WHA20.11, WHA23.18                                                                                                                                                                                                                                             | No                |
| Report on the World Health Situation (1955 – 1983)                                                              | 13; 12<br>Chain-like        | <u>WHA8.40</u> , WHA9.27, WHA11.38, WHA15.43, WHA17.35, WHA19.52, WHA21.46, WHA23.24, WHA25.56, WHA27.60, WHA29.22, WHA36.35, WHA39.7                                                                                                                                                                          | Yes               |
| Reimbursement of travel expenses (1948 – 1999)                                                                  | 6; 7<br>Chain-like          | <u>WHA1.139</u> , WHA1.91, WHA28.38, WHA30.11, WHA50.1, WHA52.9                                                                                                                                                                                                                                                | No                |
| Health problems of seafarers and health services available to them (1960 – 1967)                                | 4; 3<br>Chain               | WHA13.51, WHA15.21, WHA19.48, WHA20.44                                                                                                                                                                                                                                                                         | No                |
| Smallpox (1954 – 2007)                                                                                          | 9, 11<br>Chain-like         | <u>WHA7.5</u> , WHA 8.38, WHA11.54, WHA28.52, WHA33.4, WHA49.10, WHA52.10, WHA55.15, WHA60.1                                                                                                                                                                                                                   | Yes               |

Abbreviations: GC: giant component, WHA: World Health Organization. \* This refers to the nodes and selected edges for chain-like behaviour. In some case, chain like behaviour can have forks with two linked resolutions. Underlined are the resolutions used a starting point for the analysis. In italics are manually selected endpoint when the subnetwork is no longer showing a chain-line pattern.



Wernli, Falcone et al. BMJ Global Health, version 21.03.2023

**Supplementary material 9 – Example of a chain-like component on the topic of cardiovascular diseases 1965 – 1989 starting from resolution WHA18.43**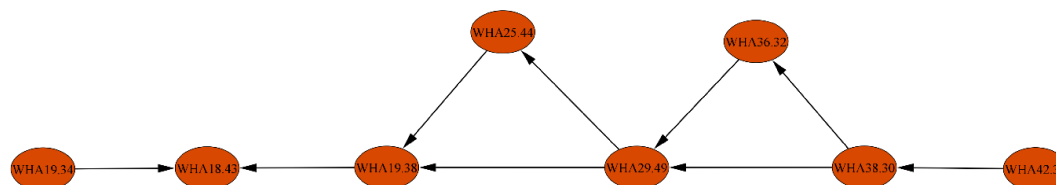**Supplementary material 10 – Community detection: radial-shaped components**

A perfect radial component would have only incoming edges and no connectivity between the direct neighbours of the central node. The first step in the identification of relevant radial-shaped components was to calculate the differences between incoming and outgoing edges for each node of the network. A high value for this difference helps identify nodes which are situated at the centre of a potential radial structure (DIFF). However, additional information is needed about the connectivity between the first neighbours. A second step was to create sub-networks that include the directly connected neighbours for the nodes with a high value during the first step. To evaluate whether the first neighbours are highly connected between themselves, we looked at the ratio of the number of nodes with no incoming connection as a proportion of the total number of nodes (RATIO) in each sub-network. Only those with a score equals or above 50% were considered. A total score (TS) combining the two dimensions was calculated as their ratio. Those with the highest score exhibit a highly radial behaviour.

| Topic                                                                                                            | Period         | DIFF<br>RATIO<br>TS                     | Resolutions which are parts of a radial structure                                                                                                                                                                                                                                                                                                                                                                                                                                | Part of the<br>giant<br>component |
|------------------------------------------------------------------------------------------------------------------|----------------|-----------------------------------------|----------------------------------------------------------------------------------------------------------------------------------------------------------------------------------------------------------------------------------------------------------------------------------------------------------------------------------------------------------------------------------------------------------------------------------------------------------------------------------|-----------------------------------|
| Scales of assessment<br>(Resolution WHA8.5)                                                                      | 1954 –<br>2001 | 43-2 = 41<br>38/46 = 82.6%<br>TS = 33.9 | WHA7.15, WHA7.16, WHA8.5, WHA9.14,<br>WHA9.17, WHA10.10, WHA10.9, WHA12.7,<br>WHA15.13, WHA16.10, WHA22.6, WHA24.12,<br>WHA24.13, WHA25.10, WHA26.21, WHA29.15,<br>WHA30.5, WHA30.6, WHA31.15, WHA32.6,<br>WHA32.7, WHA33.10, WHA33.11, WHA33.14,<br>WHA33.9, WHA34.6, WHA35.6, WHA35.7,<br>WHA35.8, WHA36.7, WHA36.8, WHA37.8,<br>WHA37.9, WHA38.5, WHA38.6, WHA39.9,<br>WHA43.22, WHA44.18, WHA45.11, WHA45.13,<br>WHA45.14, WHA45.15, WHA46.12, WHA47.22,<br>WHA50.9, WHA54.9 | No                                |
| Review of method of<br>establishment of<br>scale of assessment<br>(WHA24.12)                                     | 1955 –<br>2001 | 38-1 = 37<br>35/40 = 87.5%<br>TS = 32.4 | WHA8.5, WHA24.12, WHA25.10, WHA25.8,<br>WHA26.21, WHA26.19, WHA26.18, WHA27.11,<br>WHA29.15, WHA30.6, WHA30.5, WHA31.15,<br>WHA32.7, WHA32.6, WHA33.14, WHA33.9,<br>WHA33.11, WHA33.10, WHA34.6, WHA35.8,<br>WHA35.7, WHA35.6, WHA36.8, WHA36.7,<br>WHA37.9, WHA37.8, WHA38.6, WHA38.5,<br>WHA39.9, WHA43.22, WHA44.18, WHA45.11,<br>WHA45.15, WHA45.14, WHA45.13, WHA46.12,<br>WHA47.22, WHA47.21, WHA50.9, WHA54.9                                                             | No                                |
| Assessments of new<br>members;<br>assessment of<br>Mauritius and of<br>Southern Yemen<br>(Resolution<br>WHA22.6) | 1955 –<br>1995 | 37-2 = 35<br>36/40 = 90%<br>TS = 31.5   | WHA8.5, WHA17.10, WHA22.6, WHA24.34,<br>WHA24.13, WHA25.53, WHA25.51, WHA25.52,<br>WHA25.8, WHA25.9, WHA26.53, WHA26.20,<br>WHA26.19, WHA27.39, WHA27.7, WHA27.38,<br>WHA28.11, WHA28.12, WHA28.14, WHA28.13,<br>WHA28.15, WHA29.9, WHA29.10, WHA29.7,<br>WHA29.8, WHA29.6, WHA29.11, WHA31.14,<br>WHA33.13, WHA37.11, WHA37.10, WHA44.19,                                                                                                                                       | No                                |

Wernli, Falcone et al. BMJ Global Health, version 21.03.2023

|                                                                                                                                                                     |             |                                           |                                                                                                                                                                                                                                                                                                                                                                                            |    |
|---------------------------------------------------------------------------------------------------------------------------------------------------------------------|-------------|-------------------------------------------|--------------------------------------------------------------------------------------------------------------------------------------------------------------------------------------------------------------------------------------------------------------------------------------------------------------------------------------------------------------------------------------------|----|
|                                                                                                                                                                     |             |                                           | WHA44.21, WHA44.20, WHA45.12, WHA46.13, WHA46.14, WHA47.23, WHA47.24, WHA48.19                                                                                                                                                                                                                                                                                                             |    |
| Review of method of establishment of the scale of assessment (WHA26.21)                                                                                             | 1955 – 1997 | 36-3 = 33<br>34/40 = 85%<br>TS = 28.1     | WHA8.5, WHA13.16, WHA24.12, WHA26.21, WHA27.11, WHA27.7, WHA28.17, WHA28.11, WHA29.16, WHA29.15, WHA30.5, WHA30.6, WHA31.15, WHA32.7, WHA32.6, WHA33.14, WHA33.9, WHA33.11, WHA33.10, WHA34.6, WHA35.8, WHA35.7, WHA35.6, WHA36.8, WHA36.7, WHA37.9, WHA37.8, WHA38.6, WHA38.5, WHA39.9, WHA43.22, WHA44.18, WHA45.15, WHA45.14, WHA45.13, WHA45.11, WHA46.12, WHA47.22, WHA47.21, WHA50.9 | No |
| Incentive scheme to promote timely payment of assessed contributions by members (WHA41.12)                                                                          | 1988 – 2002 | 18 - 0 = 18<br>18/19 = 94.7%<br>TS = 17.1 | WHA48.5, WHA50.7, WHA44.11, WHA42.7, WHA47.19, WHA50.25, WHA48.32, WHA54.8, WHA45.7, WHA49.3, WHA41.12, WHA44.35, WHA43.5, WHA46.34, WHA53.5, WHA55.7, WHA51.1, WHA46.9, WHA52.1                                                                                                                                                                                                           | No |
| Members in arrears in the payment of their contributions to an extent which would justify invoking Article 7 of the Constitution: statement of principles (WHA41.7) | 1955 – 2022 | 30 - 3 = 27<br>17/34 = 50%<br>TS = 13.5   | WHA8.13, WHA16.20, WHA37.7, WHA41.7, WHA44.12, WHA45.8, WHA46.10, WHA47.18, WHA48.6, WHA49.4, WHA50.8, WHA51.2, WHA52.4, WHA53.2, WHA54.6, WHA54.5, WHA55.4, WHA56.10, WHA57.5, WHA58.7, WHA59.5, WHA60.4, WHA61.7, WHA62.4, WHA64.19, WHA65.11, WHA66.13, WHA67.5, WHA68.11, WHA69.13, WHA70.8, WHA71.10, WHA72.9, WHA75.10                                                               | No |
| Status of collection of annual contributions and of advances to the working capital fund (WHA8.13)                                                                  | 1955-2001   | 20-0 = 20<br>14/21 = 66.7%<br>TS = 13.3   | WHA8.13, WHA9.18, WHA10.30, WHA11.11, WHA12.11, WHA13.47, WHA14.3, WHA15.9, WHA16.20, WHA18.21, WHA19.29, WHA20.31, WHA21.6, WHA22.14, WHA24.9, WHA28.18, WHA33.7, WHA37.6, WHA39.16, WHA41.7, WHA54.6                                                                                                                                                                                     | No |

Wernli, Falcone et al. BMJ Global Health, version 21.03.2023

**Supplementary material 11 – Example of a radial component regarding the scale of assessment: sub-network of WHA8.5 showing its direct neighbours (both indegree and outdegree are selected)**

WHA8.5, WHA22.6, WHA24.12, and WHA26.21 are all parts of two related radial clusters (only the resolutions directly related to WHA8.5 are shown in this figure. Taking WHA8.5 and its first neighbour (undirected) as the departure point, there is a cluster of 46 resolutions including WHA22.6, WHA24.12 and WHA26.21. This subnetwork is connected by 111 edges with only three connections among nodes different from the central nodes (WHA8.5, WHA24.12, and WHA26.21).

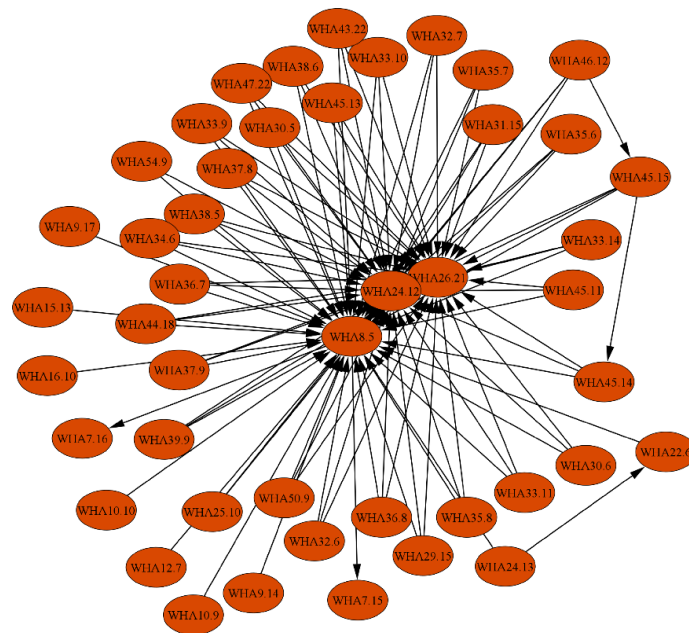

## Supplementary material 12 – Densely connected components

We run the Leiden algorithm for community detection as available by the clusterMaker 2 plugin in Cytoscape version 3.9.1.<sup>1</sup> The Leiden algorithm is a hierarchical clustering algorithm that maximizes modularity score for each community. With a resolution parameter set to 3, the resulting network had 1656 nodes and 2910 edges with 184 clusters. We ranked the clusters found by the Leiden algorithm according to the ration between the number edges and nodes. We manually extracted the main topic of the community (in some cases, the communities automatically created by the algorithm combine several topics, these communities are marked with an \* in the table below).

| Topic                                                         | Period      | Ratio between edges and nodes | Resolutions which are parts of the community                                                                                                                             | Part of the giant component |
|---------------------------------------------------------------|-------------|-------------------------------|--------------------------------------------------------------------------------------------------------------------------------------------------------------------------|-----------------------------|
| Health assistance to refugees and displaced persons in Cyprus | 1995 – 1971 | 8.0<br>136/17                 | WHA28.47, WHA29.44, WHA30.26, WHA31.25, WHA32.18, WHA33.22, WHA34.20, WHA35.18, WHA36.22, WHA37.24, WHA38.25, WHA39.11, WHA40.22, WHA41.22, WHA42.23, WHA43.13, WHA44.38 | Yes                         |

<sup>1</sup> Traag VA, Waltman L, van Eck NJ. From Louvain to Leiden: guaranteeing well-connected communities. *Scientific reports* 2019;9(1):5233. doi: 10.1038/s41598-019-41695-z

Wernli, Falcone et al. BMJ Global Health, version 21.03.2023

|                                                                     |             |                |                                                                                                                                                                                                                                                                                                                                                                                      |     |
|---------------------------------------------------------------------|-------------|----------------|--------------------------------------------------------------------------------------------------------------------------------------------------------------------------------------------------------------------------------------------------------------------------------------------------------------------------------------------------------------------------------------|-----|
| Infant and young child health nutrition                             | 1974 – 2018 | 6.31<br>164/26 | WHA27.43, WHA28.42, WHA31.47, WHA33.32, WHA34.22, WHA34.23, WHA35.26, WHA37.30, WHA39.28, WHA41.11, WHA43.3, WHA45.34, WHA46.7, WHA47.5, WHA49.15, WHA54.2, WHA55.25, WHA58.32, WHA59.21, WHA61.20, WHA63.23, WHA65.6, WHA68.19, WHA69.8, WHA69.9, WHA71.9                                                                                                                           | Yes |
| Health assistance to refugees and displaced persons in Lebanon      | 1976 – 1981 | 5.69<br>91/16  | WHA29.40, WHA30.27, WHA31.26, WHA32.10, WHA32.19, WHA33.23, WHA34.21, WHA35.19, WHA36.23, WHA36.33, WHA37.25, WHA38.26, WHA39.12, WHA40.21, WHA41.21, WHA42.22                                                                                                                                                                                                                       | Yes |
| Traditional medicine                                                | 1969 – 2014 | 3.5<br>42/12   | WHA22.54, WHA27.31, WHA29.72, WHA30.49, WHA31.33, WHA40.33, WHA41.19, WHA42.43, WHA44.34, WHA56.31, WHA62.13, WHA67.18                                                                                                                                                                                                                                                               | Yes |
| Technical cooperation, Strengthening health systems, health for all | 1961 – 2001 | 3.29<br>102/31 | WHA14.37, WHA25.23, WHA28.76, WHA28.75, WHA29.48, WHA30.23, WHA30.34, WHA30.30, WHA31.31, WHA31.54, WHA31.51, WHA31.41, WHA32.27, WHA34.24, WHA35.24, WHA36.34, WHA37.16, WHA37.15, WHA37.14, WHA38.23, WHA38.11, WHA39.23, WHA40.30, WHA40.17, WHA42.37, WHA48.26, WHA50.27, WHA51.16, WHA51.31, WHA52.23, WHA54.13                                                                 | Yes |
| Pharmaceutical products, essential drugs                            | 1968 – 2019 | 3.29<br>125/38 | WHA21.41, WHA28.66, WHA31.32, WHA32.41, WHA35.27, WHA37.32, WHA37.33, WHA39.27, WHA41.16, WHA41.17, WHA41.18, WHA43.20, WHA45.27, WHA45.28, WHA45.29, WHA45.30, WHA46.19, WHA47.12, WHA47.13, WHA47.16, WHA47.17, WHA47.32, WHA49.14, WHA50.3, WHA50.4, WHA51.17, WHA51.9, WHA52.19, WHA54.11, WHA58.27, WHA60.16, WHA60.20, WHA67.22, WHA67.25, WHA68.7, WHA69.20, WHA70.7, WHA72.5 | Yes |
| HIV-AIDS                                                            | 1987 – 1996 | 2.89<br>26/9   | WHA40.26, WHA41.24, WHA42.34, WHA42.33, WHA43.10, WHA45.35, WHA46.37, WHA48.30, WHA49.27                                                                                                                                                                                                                                                                                             | Yes |
| Midwifery                                                           | 1977 - 2021 | 2.72<br>30/11  | WHA30.48, WHA36.11, WHA42.27, WHA45.5, WHA47.9, WHA48.8, WHA49.1, WHA54.12, WHA59.27, WHA64.7, WHA74.15                                                                                                                                                                                                                                                                              | Yes |
| Tobacco and Smoking                                                 | 1970 – 1996 | 2.69<br>43/16  | WHA23.32, WHA24.48, WHA29.55, WHA31.56, WHA33.35, WHA39.14, WHA40.38, WHA41.25, WHA42.19, WHA43.16, WHA44.26, WHA45.20, WHA46.8, WHA48.11, WHA49.17, WHA49.16                                                                                                                                                                                                                        | Yes |
| Collaboration with newly independent states                         | 1975 – 1996 | 2.4<br>84/35   | WHA28.78, WHA29.23, WHA30.24, WHA31.1, WHA31.52, WHA32.20, WHA32.21, WHA32.22, WHA33.33, WHA33.34, WHA34.31, WHA34.34, WHA35.1, WHA35.20, WHA36.24, WHA37.28, WHA38.28, WHA39.24, WHA40.23, WHA41.23, WHA41.33, WHA42.17, WHA42.18, WHA43.12, WHA43.14, WHA43.15, WHA44.37, WHA44.39, WHA44.40, WHA44.43, WHA45.21, WHA46.29, WHA47.28, WHA48.31, WHA49.28                           | Yes |
| Strategy for health for all*                                        | 1974 – 2004 | 2.29<br>62/27  | WHA27.29, WHA29.32, WHA30.43, WHA32.30, WHA33.24, WHA33.17, WHA34.37, WHA34.36, WHA35.23, WHA36.31, WHA37.17, WHA37.31, WHA38.21, WHA38.20, WHA38.31, WHA39.22, WHA39.15, WHA39.7, WHA41.27, WHA41.26, WHA41.34, WHA42.2, WHA43.9, WHA45.4, WHA46.17, WHA54.22, WHA57.8                                                                                                              | Yes |
| Sensory impairment, disabilities, deficiencies                      | 1966 – 2020 | 2.29<br>55/24  | WHA19.37, WHA22.29, WHA25.55, WHA28.54, WHA29.68, WHA37.18, WHA38.18, WHA38.19, WHA39.31, WHA42.28, WHA43.2, WHA45.10, WHA45.33, WHA48.9, WHA49.13, WHA51.11, WHA52.24, WHA56.26, WHA58.24, WHA59.25, WHA60.21, WHA62.1, WHA66.4, WHA73.4                                                                                                                                            | Yes |
| Health aspects of population dynamics                               | 1965 – 1978 | 2.29<br>16/7   | WHA18.49, WHA19.43, WHA20.41, WHA21.43, WHA22.32, WHA28.44, WHA31.37                                                                                                                                                                                                                                                                                                                 | Yes |
| Public Health, Intellectual                                         | 1975 - 2022 | 2.27<br>109/48 | WHA28.72, WHA53.12, WHA53.14, WHA54.10, WHA55.11, WHA55.12, WHA55.14, WHA56.20,                                                                                                                                                                                                                                                                                                      | Yes |

Wernli, Falcone et al. BMJ Global Health, version 21.03.2023

|                                                       |             |               |                                                                                                                                                                                                                                                                                                                                                                                                                                    |     |
|-------------------------------------------------------|-------------|---------------|------------------------------------------------------------------------------------------------------------------------------------------------------------------------------------------------------------------------------------------------------------------------------------------------------------------------------------------------------------------------------------------------------------------------------------|-----|
| property, innovation and HIV-AIDS*                    |             |               | WHA56.27, WHA56.30, WHA57.14, WHA58.13, WHA58.15, WHA58.34, WHA59.11, WHA59.12, WHA59.19, WHA59.24, WHA59.26, WHA60.15, WHA60.30, WHA61.15, WHA61.21, WHA62.16, WHA63.12, WHA63.18, WHA63.19, WHA63.21, WHA63.28, WHA64.14, WHA65.17, WHA65.18, WHA65.19, WHA65.22, WHA66.22, WHA67.20, WHA67.21, WHA67.6, WHA68.18, WHA68.6, WHA69.22, WHA69.23, WHA69.25, WHA70.14, WHA72.8, WHA74.6, WHA75.14, WHA75.8                          |     |
| Non-communicable diseases, oral health*               | 1969 - 2021 | 2.22<br>67/30 | WHA22.30, WHA28.64, WHA31.50, WHA36.14, WHA42.39, WHA51.18, WHA52.18, WHA53.16, WHA53.17, WHA54.18, WHA55.23, WHA56.1, WHA57.17, WHA58.22, WHA59.17, WHA60.17, WHA60.23, WHA61.14, WHA63.14, WHA64.11, WHA64.28, WHA66.10, WHA69.2, WHA69.6, WHA70.11, WHA70.12, WHA71.14, WHA71.6, WHA73.2, WHA74.4                                                                                                                               | Yes |
| Indigenous health                                     | 1992 - 2001 | 2.15<br>28/13 | WHA45.24, WHA47.27, WHA48.14, WHA48.16, WHA48.24, WHA49.26, WHA50.23, WHA50.28, WHA50.31, WHA51.24, WHA51.7, WHA53.10, WHA54.16                                                                                                                                                                                                                                                                                                    | Yes |
| Health systems, health workforce, primary healthcare* | 1966 – 2022 | 2.12<br>91/43 | WHA19.36, WHA27.59, WHA49.25, WHA50.19, WHA56.24, WHA56.6, WHA57.10, WHA57.19, WHA58.17, WHA58.28, WHA58.33, WHA59.23, WHA60.22, WHA60.27, WHA60.29, WHA61.16, WHA61.17, WHA62.12, WHA63.16, WHA64.27, WHA64.6, WHA64.8, WHA64.9, WHA66.23, WHA66.24, WHA67.15, WHA67.19, WHA67.23, WHA67.24, WHA68.15, WHA69.1, WHA69.19, WHA69.24, WHA69.5, WHA69.7, WHA70.15, WHA70.6, WHA71.7, WHA72.16, WHA72.3, WHA74.14, WHA74.17, WHA75.17 | Yes |
| Water and sanitation, health and the environment*     | 1965 – 2019 | 2.10<br>86/41 | WHA24.26, WHA27.27, WHA31.28, WHA31.42, WHA35.17, WHA39.20, WHA40.18, WHA41.15, WHA42.25, WHA42.26, WHA42.44, WHA44.27, WHA44.28, WHA44.6, WHA45.31, WHA45.32, WHA46.20, WHA50.13, WHA51.12, WHA51.28, WHA51.29, WHA56.22, WHA57.16, WHA59.15, WHA60.24, WHA61.19, WHA62.14, WHA63.25, WHA63.26, WHA64.15, WHA64.24, WHA65.8, WHA66.11, WHA67.11, WHA67.12, WHA67.14, WHA68.8, WHA69.4, WHA71.4, WHA72.7, WHA74.16                 | Yes |
| Quality control of drugs                              | 1962 – 1994 | 2.05<br>45/22 | WHA15.41, WHA16.36, WHA17.39, WHA17.41, WHA18.36, WHA18.42, WHA19.35, WHA19.47, WHA20.34, WHA20.51, WHA21.37, WHA22.41, WHA22.50, WHA23.13, WHA23.45, WHA23.48, WHA24.56, WHA25.61, WHA26.30, WHA26.31, WHA28.65, WHA47.11                                                                                                                                                                                                         | yes |
| Drug dependence and alcohol abuse                     | 1965 – 2012 | 1.97<br>56/28 | WHA18.47, WHA20.42, WHA20.43, WHA21.42, WHA23.42, WHA24.57, WHA25.62, WHA26.52, WHA27.28, WHA28.80, WHA28.81, WHA28.84, WHA29.21, WHA30.38, WHA30.45, WHA32.13, WHA32.40, WHA33.27, WHA36.12, WHA37.23, WHA39.25, WHA39.26, WHA42.20, WHA42.41, WHA43.11, WHA46.27, WHA51.22, WHA55.10, WHA57.11, WHA58.26, WHA61.4, WHA63.13                                                                                                      | Yes |

Wernli, Falcone et al. BMJ Global Health, version 21.03.2023

**Supplementary material 13 – Example of a densely connected component: Health assistance to refugee and displaced persons in Cyprus 1975 – 1991**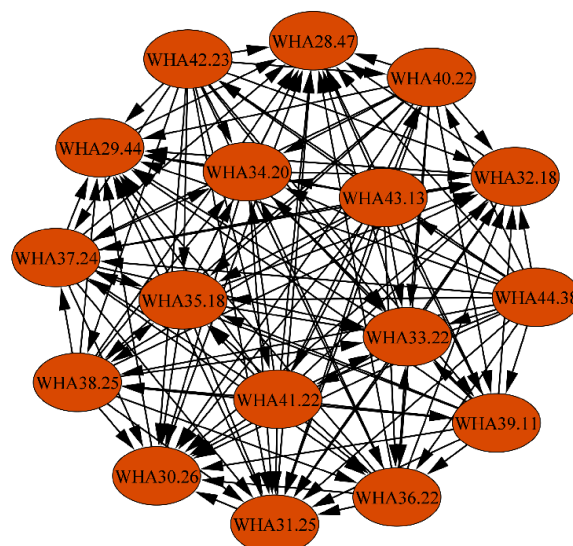**Supplementary material 14 – Authorities and hubs**

| Authorities                                                                                                                                                                | Value |
|----------------------------------------------------------------------------------------------------------------------------------------------------------------------------|-------|
| WHA34.22 International Code of Marketing of Breastmilk Substitutes                                                                                                         | 0,343 |
| WHA39.28 Infant and Young Child Feeding                                                                                                                                    | 0,318 |
| WHA35.26 International Code of Marketing of Breast-milk Substitutes                                                                                                        | 0,297 |
| WHA41.11 Infant and young child nutrition                                                                                                                                  | 0,296 |
| WHA37.30 Infant and young child nutrition                                                                                                                                  | 0,288 |
| WHA33.32 Infant and Young Child Feeding                                                                                                                                    | 0,274 |
| WHA43.3 Protecting, promoting and supporting breast-feeding                                                                                                                | 0,261 |
| WHA47.5 Infant and young child nutrition                                                                                                                                   | 0,251 |
| WHA49.15 Infant and young child nutrition                                                                                                                                  | 0,238 |
| WHA45.34 Infant and young child nutrition (progress and evaluation report; and status of implementation of the International Code of Marketing of Breast-milk Substitutes) | 0,229 |
| Hubs                                                                                                                                                                       | Value |
| WHA71.9 Infant and young child feeding                                                                                                                                     | 0,387 |
| WHA69.9 Ending inappropriate promotion of foods for infants and young children                                                                                             | 0,376 |
| WHA63.23 Infant and young child nutrition                                                                                                                                  | 0,366 |
| WHA55.25 Infant and young child nutrition                                                                                                                                  | 0,314 |
| WHA61.20 Infant and young child nutrition: biennial progress report                                                                                                        | 0,306 |
| WHA54.2 Infant and young child nutrition                                                                                                                                   | 0,285 |
| WHA59.21 Infant and young child nutrition 2006                                                                                                                             | 0,277 |
| WHA47.5 Infant and young child nutrition                                                                                                                                   | 0,239 |
| WHA58.32 Infant and young child nutrition                                                                                                                                  | 0,200 |
| WHA45.34 Infant and young child nutrition (progress and evaluation report; and status of implementation of the International Code of Marketing of Breast-milk Substitutes) | 0,197 |



Wernli, Falcone et al. BMJ Global Health, version 21.03.2023

**Supplementary material 15 – WHA Resolutions with the highest betweenness centrality in the giant component 1948-2022**

| Title of the resolution                                                                                                                                      | Date | Betweenness Centrality |
|--------------------------------------------------------------------------------------------------------------------------------------------------------------|------|------------------------|
| WHA62.12 Primary health care, including health system strengthening                                                                                          | 2009 | 4.005544282791589      |
| WHA48.13 Communicable diseases prevention and control: new, emerging and re-emerging infectious diseases                                                     | 1995 | 3.2740394584296704     |
| WHA54.13 Strengthening health systems in developing countries                                                                                                | 2001 | 2.407740012665606      |
| WHA66.10 Follow-up to the Political Declaration of the High-level Meeting of the General Assembly on the Prevention and Control of Non-communicable Diseases | 2013 | 2.3204711470064745     |
| WHA51.29 The protection of human health from threats related to climate change and stratospheric ozone depletion                                             | 1998 | 2.25530658618247       |
| WHA61.19 Climate change and health                                                                                                                           | 2008 | 2.210376136487348      |
| WHA57.17 Global strategy on diet, physical activity and health                                                                                               | 2004 | 1.9439698336734668     |
| WHA13.62 Extension of the agreement with the United Nations Relief and Works Agency for Palestine refugees in the Near East                                  | 1960 | 1.875                  |
| WHA42.42 Women's health                                                                                                                                      | 1989 | 1.8487427520317032     |
| WHA37.33 Rational use of drugs                                                                                                                               | 1984 | 1.8020999774806112     |
| WHA62.14 Reducing health inequities through action on the social determinants of health                                                                      | 2009 | 1.7645244755165277     |
| WHA64.9 Sustainable health financing structures and universal coverage                                                                                       | 2011 | 1.7370103842898958     |
| WHA8.46 Extension of the agreement with the United Nations Relief and Works Agency for Palestine Refugees in the Near East                                   | 1955 | 1.7222222222222222     |
| WHA55.25 Infant and young child nutrition                                                                                                                    | 2002 | 1.711593490139583      |
| WHA28.75 Assistance to developing countries - I                                                                                                              | 1975 | 1.6885747470554393     |
| WHA24.56 Quality, safety and efficacy of drugs                                                                                                               | 1971 | 1.6012598161493112     |
| WHA30.43 Technical cooperation                                                                                                                               | 1977 | 1.4941689713175814     |
| WHA55.19 WHO's contribution to achievement of the development goals of the United Nations Millennium Declaration                                             | 2002 | 1.4587214539224194     |
| WHA48.10 Reproductive health: WHO's role in the global strategy                                                                                              | 1995 | 1.440287764898029      |
| WHA45.35 Global strategy for the prevention and control of AIDS                                                                                              | 1992 | 1.4183384771034526     |

Wernli, Falcone et al. BMJ Global Health, version 21.03.2023

**Supplementary material 16 – Number of resolutions in and outside the giant component (gc) related to the MeSH classification**

| Nb | MesH Headings                        | GC  | Rest | Total | Diff | % in the GC |
|----|--------------------------------------|-----|------|-------|------|-------------|
| 1  | Budgets                              | 31  | 538  | 569   | -507 | 5%          |
| 2  | Financial Management                 | 46  | 454  | 500   | -408 | 9%          |
| 3  | Organization and Administration      | 133 | 349  | 482   | -216 | 28%         |
| 4  | World Health Organization            | 105 | 171  | 276   | -66  | 38%         |
| 5  | International Cooperation            | 162 | 109  | 271   | 53   | 60%         |
| 6  | Interinstitutional Relations         | 115 | 147  | 262   | -32  | 44%         |
| 7  | United Nations                       | 123 | 104  | 227   | 19   | 54%         |
| 8  | National Health Programs             | 134 | 62   | 196   | 72   | 68%         |
| 9  | Delivery of Health Care              | 128 | 45   | 173   | 83   | 74%         |
| 10 | International Agencies               | 82  | 74   | 156   | 8    | 53%         |
| 11 | Regional Health Planning             | 24  | 90   | 114   | -66  | 21%         |
| 12 | Health Planning Technical Assistance | 51  | 45   | 96    | 6    | 53%         |
| 13 | Governing Board                      | 16  | 78   | 94    | -62  | 17%         |
| 14 | Financial Audit                      | 0   | 92   | 92    | -92  | 0%          |
| 15 | Salaries and Fringe Benefits         | 9   | 81   | 90    | -72  | 10%         |
| 16 | Program Development                  | 42  | 41   | 83    | 1    | 51%         |
| 17 | Pharmaceutical Preparations          | 63  | 16   | 79    | 47   | 80%         |
| 18 | Financial Support                    | 42  | 36   | 78    | 6    | 54%         |
| 19 | Economic Development                 | 36  | 41   | 77    | -5   | 47%         |
| 20 | Personnel Management                 | 23  | 52   | 75    | -29  | 31%         |
| 21 | Capital Financing                    | 0   | 74   | 74    | -74  | 0%          |
| 22 | Organizational Policy                | 23  | 50   | 73    | -27  | 32%         |
| 23 | Health Promotion                     | 47  | 18   | 65    | 29   | 72%         |
| 24 | Disease Outbreaks                    | 25  | 40   | 65    | -15  | 38%         |
| 25 | Developing Countries                 | 29  | 31   | 60    | -2   | 48%         |
| 26 | Research                             | 42  | 16   | 58    | 26   | 72%         |
| 27 | Health Planning                      | 48  | 10   | 58    | 38   | 83%         |
| 28 | Malaria                              | 32  | 23   | 55    | 9    | 58%         |
| 29 | Communicable Disease Control         | 14  | 41   | 55    | -27  | 25%         |
| 30 | Health Status                        | 28  | 26   | 54    | 2    | 52%         |
| 31 | Pensions                             | 0   | 53   | 53    | -53  | 0%          |
| 32 | Emergency Medical Services           | 40  | 12   | 52    | 28   | 77%         |
| 33 | Equipment and Supplies               | 26  | 25   | 51    | 1    | 51%         |
| 34 | Health Policy                        | 34  | 16   | 50    | 18   | 68%         |
| 35 | Sanitation                           | 12  | 34   | 46    | -22  | 26%         |
| 36 | Health Services                      | 27  | 19   | 46    | 8    | 59%         |
| 37 | Refugees                             | 29  | 16   | 45    | 13   | 64%         |
| 38 | Drug and Narcotic Control            | 35  | 10   | 45    | 25   | 78%         |
| 39 | Organizational Case Studies          | 6   | 38   | 44    | -32  | 14%         |
| 40 | Administrative Personnel             | 0   | 43   | 43    | -43  | 0%          |
| 41 | Social Conditions                    | 15  | 25   | 40    | -10  | 38%         |
| 42 | Primary Health Care                  | 37  | 3    | 40    | 34   | 93%         |
| 43 | Health Status Indicators             | 22  | 18   | 40    | 4    | 55%         |
| 44 | Smallpox                             | 18  | 18   | 36    | 0    | 50%         |
| 45 | Constitution and Bylaws              | 9   | 23   | 32    | -14  | 28%         |
| 46 | Awards and Prizes                    | 1   | 31   | 32    | -30  | 3%          |
| 47 | Socioeconomic Factors                | 27  | 4    | 31    | 23   | 87%         |
| 48 | Anniversaries and Special Events     | 13  | 18   | 31    | -5   | 42%         |
| 49 | Drug Industry                        | 27  | 4    | 31    | 23   | 87%         |
| 50 | Nutrition Policy                     | 24  | 5    | 29    | 19   | 83%         |

Abbreviations used in the table: GC: Giant component, Diff: Difference between the number of resolutions in the giant component and the rest.

Wernli, Falcone et al. BMJ Global Health, version 21.03.2023

## Supplementary material 17 – Evolution of MeSH under different administration of WHO as percentage of the total amount of MeSH term attributed for a given year.

Only the first sixty most represented MeSH term from 1948-2019 are represented.

| MeSH                                 | 1948-1953 | 1954-1973 | 1974-1988 | 1989-1998 | 1999-2003 | 2004-2007 | 2008-2017 | 2018-2019 | Trend |
|--------------------------------------|-----------|-----------|-----------|-----------|-----------|-----------|-----------|-----------|-------|
| Budgets                              | 6,3%      | 8,8%      | 6,3%      | 5,8%      | 6,8%      | 6,6%      | 5,1%      | 5,4%      |       |
| Financial Management                 | 6,9%      | 6,9%      | 6,2%      | 6,0%      | 4,8%      | 2,5%      | 3,8%      | 5,4%      |       |
| Organization and Administration      | 7,6%      | 8,3%      | 5,8%      | 4,3%      | 2,0%      | 1,4%      | 2,7%      | 4,1%      |       |
| World Health Organization            | 3,0%      | 3,0%      | 4,5%      | 4,1%      | 1,3%      | 1,1%      | 1,2%      | 2,7%      |       |
| International Cooperation            | 4,2%      | 2,5%      | 3,2%      | 4,0%      | 4,5%      | 3,0%      | 3,0%      | 0,0%      |       |
| Interinstitutional Relations         | 4,5%      | 4,1%      | 3,6%      | 2,4%      | 1,5%      | 1,7%      | 0,3%      | 0,0%      |       |
| United Nations                       | 1,8%      | 3,2%      | 3,6%      | 2,3%      | 2,0%      | 0,6%      | 1,4%      | 1,4%      |       |
| National Health Programs             | 0,5%      | 1,7%      | 2,8%      | 2,8%      | 3,0%      | 4,1%      | 3,0%      | 1,4%      |       |
| Delivery of Health Care              | 0,1%      | 0,6%      | 3,6%      | 3,1%      | 2,0%      | 1,7%      | 1,7%      | 2,7%      |       |
| International Agencies               | 0,4%      | 2,0%      | 3,2%      | 1,9%      | 0,3%      | 0,0%      | 0,3%      | 0,0%      |       |
| Regional Health Planning             | 3,4%      | 2,3%      | 1,0%      | 0,9%      | 0,0%      | 0,0%      | 0,0%      | 0,0%      |       |
| Health Planning Technical Assistance | 1,4%      | 1,1%      | 1,9%      | 1,0%      | 0,0%      | 0,0%      | 0,0%      | 0,0%      |       |
| Governing Board                      | 1,7%      | 2,4%      | 0,9%      | 0,2%      | 0,3%      | 0,3%      | 0,1%      | 0,0%      |       |
| Financial Audit                      | 1,3%      | 1,3%      | 0,8%      | 0,7%      | 1,3%      | 0,8%      | 2,2%      | 1,4%      |       |
| Salaries and Fringe Benefits         | 1,6%      | 1,3%      | 0,6%      | 0,9%      | 1,5%      | 0,8%      | 1,4%      | 2,7%      |       |
| Program Development                  | 1,3%      | 1,2%      | 1,1%      | 1,2%      | 0,3%      | 0,3%      | 0,0%      | 0,0%      |       |
| Pharmaceutical Preparations          | 1,2%      | 0,8%      | 0,8%      | 1,2%      | 1,0%      | 1,1%      | 0,9%      | 1,4%      |       |
| Financial Support                    | 0,0%      | 1,3%      | 1,2%      | 0,8%      | 0,5%      | 0,6%      | 0,4%      | 2,7%      |       |
| Economic Development                 | 0,9%      | 1,6%      | 0,9%      | 0,5%      | 0,5%      | 0,3%      | 0,3%      | 0,0%      |       |
| Personnel Management                 | 1,4%      | 1,0%      | 0,6%      | 1,3%      | 0,8%      | 0,3%      | 0,6%      | 0,0%      |       |
| Capital Financing                    | 0,5%      | 1,6%      | 0,6%      | 0,8%      | 1,5%      | 0,3%      | 0,1%      | 0,0%      |       |
| Organizational Policy                | 2,1%      | 1,3%      | 0,7%      | 0,4%      | 0,0%      | 0,6%      | 0,3%      | 0,0%      |       |
| Health Promotion                     | 0,3%      | 1,1%      | 0,3%      | 0,8%      | 2,0%      | 1,7%      | 0,7%      | 1,4%      |       |
| Disease Outbreaks                    | 2,1%      | 1,2%      | 0,2%      | 0,2%      | 1,3%      | 1,1%      | 0,7%      | 0,0%      |       |
| Developing Countries                 | 1,2%      | 1,0%      | 0,5%      | 0,5%      | 1,0%      | 1,1%      | 0,1%      | 0,0%      |       |
| Research                             | 0,5%      | 1,0%      | 0,3%      | 0,4%      | 1,0%      | 1,4%      | 1,4%      | 0,0%      |       |
| Health Planning                      | 0,0%      | 0,3%      | 1,1%      | 0,6%      | 0,3%      | 0,3%      | 2,0%      | 1,4%      |       |
| Malaria                              | 0,7%      | 1,5%      | 0,2%      | 0,3%      | 0,3%      | 0,6%      | 0,3%      | 0,0%      |       |
| Communicable Disease Control         | 2,2%      | 0,9%      | 0,6%      | 0,2%      | 0,0%      | 0,0%      | 0,3%      | 0,0%      |       |
| Health Status                        | 0,1%      | 0,5%      | 0,6%      | 0,9%      | 1,3%      | 1,1%      | 0,9%      | 0,0%      |       |
| Pensions                             | 0,9%      | 1,7%      | 0,2%      | 0,0%      | 0,0%      | 0,0%      | 0,0%      | 0,0%      |       |
| Emergency Medical Services           | 0,0%      | 0,0%      | 1,0%      | 0,9%      | 0,3%      | 1,4%      | 1,2%      | 1,4%      |       |
| Equipment and Supplies               | 0,8%      | 0,6%      | 1,0%      | 0,6%      | 0,0%      | 0,0%      | 0,0%      | 0,0%      |       |
| Health Policy                        | 0,4%      | 0,5%      | 0,7%      | 0,8%      | 0,0%      | 0,6%      | 0,9%      | 0,0%      |       |
| Health Services                      | 0,0%      | 0,1%      | 0,6%      | 1,4%      | 1,3%      | 0,6%      | 0,6%      | 0,0%      |       |
| Sanitation                           | 1,4%      | 1,0%      | 0,2%      | 0,4%      | 0,0%      | 0,0%      | 0,0%      | 1,4%      |       |
| Drug and Narcotic Control            | 0,3%      | 1,0%      | 0,5%      | 0,5%      | 0,3%      | 0,0%      | 0,0%      | 0,0%      |       |
| Refugees                             | 0,9%      | 0,6%      | 0,8%      | 0,3%      | 0,0%      | 0,0%      | 0,1%      | 0,0%      |       |
| Organizational Case Studies          | 0,5%      | 1,3%      | 0,4%      | 0,0%      | 0,0%      | 0,0%      | 0,0%      | 0,0%      |       |
| Administrative Personnel             | 0,3%      | 0,3%      | 0,4%      | 0,6%      | 1,3%      | 0,6%      | 1,3%      | 2,7%      |       |
| Social Conditions                    | 0,3%      | 0,0%      | 0,5%      | 0,8%      | 1,3%      | 1,1%      | 0,9%      | 0,0%      |       |
| Health Status Indicators             | 1,3%      | 0,3%      | 0,4%      | 0,1%      | 0,8%      | 0,3%      | 1,2%      | 0,0%      |       |
| Primary Health Care                  | 0,0%      | 0,0%      | 1,1%      | 0,5%      | 0,3%      | 0,3%      | 0,3%      | 2,7%      |       |
| Smallpox                             | 0,4%      | 0,9%      | 0,3%      | 0,1%      | 0,5%      | 0,3%      | 0,0%      | 0,0%      |       |
| Constitution and Bylaws              | 0,5%      | 0,7%      | 0,2%      | 0,5%      | 0,0%      | 0,0%      | 0,3%      | 0,0%      |       |
| Awards and Prizes                    | 0,5%      | 0,9%      | 0,3%      | 0,0%      | 0,0%      | 0,0%      | 0,0%      | 0,0%      |       |
| Anniversaries and Special Events     | 0,3%      | 0,5%      | 0,4%      | 0,2%      | 0,5%      | 0,6%      | 0,1%      | 0,0%      |       |
| Drug Industry                        | 0,1%      | 0,5%      | 0,3%      | 0,6%      | 0,3%      | 0,3%      | 0,1%      | 0,0%      |       |
| Socioeconomic Factors                | 0,1%      | 0,3%      | 0,5%      | 0,4%      | 0,3%      | 0,3%      | 0,7%      | 0,0%      |       |
| Nutrition Policy                     | 0,5%      | 0,0%      | 0,4%      | 0,2%      | 0,5%      | 1,1%      | 0,9%      | 0,0%      |       |
| Global Health                        | 0,1%      | 0,4%      | 0,5%      | 0,1%      | 0,3%      | 0,3%      | 0,4%      | 0,0%      |       |
| Health Systems Plans                 | 0,0%      | 0,0%      | 0,4%      | 0,2%      | 0,5%      | 1,1%      | 1,2%      | 2,7%      |       |
| Environmental Health                 | 0,1%      | 0,4%      | 0,4%      | 0,4%      | 0,3%      | 0,0%      | 0,1%      | 0,0%      |       |
| Disease Notification                 | 0,9%      | 0,3%      | 0,1%      | 0,1%      | 0,8%      | 0,8%      | 0,7%      | 0,0%      |       |
| Immunization Programs                | 0,1%      | 0,0%      | 0,1%      | 0,2%      | 1,0%      | 1,1%      | 1,0%      | 2,7%      |       |
| Organizational Objectives            | 0,3%      | 0,0%      | 0,4%      | 0,2%      | 0,5%      | 1,1%      | 0,6%      | 0,0%      |       |
| Emergencies                          | 0,0%      | 0,0%      | 0,8%      | 0,3%      | 0,0%      | 0,3%      | 0,0%      | 0,0%      |       |
| Quarantine                           | 0,9%      | 0,8%      | 0,0%      | 0,0%      | 0,0%      | 0,0%      | 0,0%      | 0,0%      |       |
| HIV Infections                       | 0,0%      | 0,0%      | 0,1%      | 0,6%      | 1,5%      | 1,4%      | 0,3%      | 0,0%      |       |
| Health Services Accessibility        | 0,0%      | 0,2%      | 0,0%      | 0,2%      | 0,5%      | 0,3%      | 1,4%      | 2,7%      |       |

Wernli, Falcone et al. BMJ Global Health, version 21.03.2023

**Supplementary material 18 – Ranking of 24 meta-categories based on MeSH terms (used >4 times from 1948 to 2019) for several WHO administration and limited to WHA resolutions with degree  $\geq 1$ .**

| Metacategories                                | 1948-1953 | 1954-1973 | 1999-2003 | 1989-1998 | 1974-1988 | 2004-2007 | 2008-2017 | 2018-2019 | TOTAL Rank |
|-----------------------------------------------|-----------|-----------|-----------|-----------|-----------|-----------|-----------|-----------|------------|
| WHO Budgets and finance                       | 1         | 1         | 2         | 2         | 3         | 6         | 4         | 3         | 1          |
| International cooperation and the UN system   | 4         | 2         | 3         | 1         | 1         | 4         | 3         | 5         | 2          |
| Health planning, management, and policy       | 3         | 3         | 5         | 5         | 2         | 1         | 2         | 2         | 3          |
| WHO management and administration             | 2         | 4         | 9         | 3         | 4         | 7         | 9         | 6         | 4          |
| Communicable diseases                         | 5         | 5         | 1         | 6         | 5         | 2         | 1         | 1         | 5          |
| Health systems and healthcare delivery        | 7         | 7         | 6         | 4         | 4         | 5         | 8         | 2         | 6          |
| Specific populations                          | 13        | 10        | 4         | 7         | 7         | 3         | 5         | 4         | 7          |
| Education and research                        | 11        | 9         | 11        | 11        | 7         | 11        | 6         | 4         | 8          |
| Medicines and drug policy                     | 9         | 11        | 7         | 10        | 8         | 7         | 12        | 5         | 9          |
| Social determinants of health and development | 8         | 6         | 10        | 12        | 9         | 12        | 11        | 6         | 10         |
| Specific organizations (e.g., WHO, PAHO)      | 11        | 13        | 16        | 8         | 6         | 14        | 17        | 5         | 11         |
| Substance abuse, tobacco, and alcohol         | 10        | 12        | 8         | 13        | 11        | 10        | 7         | 5         | 12         |
| Specific countries and regions                | 8         | 10        | 12        | 12        | 13        | 9         | 12        | 5         | 13         |
| Health metrics and evaluation                 | 13        | 8         | 17        | 14        | 10        | 15        | 13        | 5         | 14         |
| Environmental health, water and sanitation    | 12        | 16        | 12        | 9         | 12        | 13        | 11        | 6         | 15         |
| Population and public health                  | 6         | 12        | 6         | 16        | 15        | 6         | 9         | 6         | 16         |
| Programme development and implementation      | 13        | 15        | 16        | 14        | 14        | 12        | 14        | 4         | 17         |
| Emergencies, disaster and relief              | 13        | 19        | 10        | 15        | 16        | 8         | 10        | 6         | 18         |
| Health workforce and medical specialties      | 13        | 17        | 13        | 18        | 17        | 9         | 15        | 5         | 19         |
| Food and nutrition                            | 13        | 14        | 14        | 19        | 19        | 15        | 15        | 6         | 20         |
| Non-communicable diseases and mental health   | 13        | 18        | 15        | 17        | 18        | 15        | 14        | 6         | 21         |
| Health surveillance and information systems   | 13        | 20        | 12        | 19        | 20        | 9         | 13        | 6         | 21         |
| Technologies                                  | 13        | 21        | 17        | 16        | 20        | 13        | 16        | 6         | 22         |
| Specific diseases and medical procedures      | 13        | 20        | 17        | 18        | 21        | 13        | 16        | 6         | 23         |

**Supplementary material 19 – Word cloud of the title of resolutions 1948 – 2022**

[illegible]

The table was computed by counting the occurrence of a list of selected keywords in the title of all WHA resolutions in the dataset. As, in some cases, several keywords were used to identify a health issue, score were normalized as 1. To make the score independent from the number of resolutions adopted at a specific period, the number of resolutions were calculated for each administration period and then divided by the number of years of the respective administration tenure. This provides information about the relative importance of a topic for a comparable number of years. The results in the table below have not been normalized by the number of resolutions adopted each year which means that the overall score might appear higher when a high number of resolutions were adopted at a specific session of the WHA.

| Health-related topics        | 1948-1953 | 1954-1973 | 1974-1988 | 1989-1998 | 1999-2003 | 2004-2007 | 2008-2017 | 2018-2022 | Trend |
|------------------------------|-----------|-----------|-----------|-----------|-----------|-----------|-----------|-----------|-------|
| Atomic energy                | 0,00      | 1,30      | 0,00      | 0,00      | 0,00      | 0,00      | 0,00      | 0,00      |       |
| Cancer                       | 0,00      | 0,65      | 0,33      | 0,10      | 0,00      | 0,25      | 0,30      | 0,20      |       |
| Child health                 | 0,67      | 0,00      | 0,60      | 1,20      | 0,60      | 1,00      | 1,30      | 0,40      |       |
| Cholera                      | 0,17      | 0,05      | 0,00      | 0,10      | 0,00      | 0,00      | 0,10      | 0,20      |       |
| Diabetes                     | 0,17      | 0,00      | 0,00      | 0,10      | 0,00      | 0,00      | 0,00      | 0,20      |       |
| Health assistance to Cyprus  | 0,00      | 0,05      | 0,93      | 0,30      | 0,20      | 0,00      | 0,00      | 0,00      |       |
| Health assistance to Lebanon | 0,00      | 0,00      | 0,87      | 0,30      | 0,00      | 0,00      | 0,00      | 0,00      |       |
| Health promotion             | 0,00      | 0,90      | 0,07      | 0,40      | 0,00      | 0,50      | 0,00      | 0,20      |       |
| Health systems               | 0,00      | 0,00      | 0,00      | 0,20      | 0,60      | 0,75      | 0,40      | 0,20      |       |
| HIV-AIDS                     | 0,00      | 0,00      | 0,13      | 0,80      | 0,80      | 0,75      | 0,30      | 0,20      |       |
| Insecticides                 | 1,00      | 0,00      | 0,00      | 0,00      | 0,00      | 0,00      | 0,00      | 0,00      |       |
| Leprosy                      | 0,50      | 0,05      | 0,40      | 0,20      | 0,00      | 0,00      | 0,00      | 0,00      |       |
| Malaria                      | 0,50      | 1,85      | 0,40      | 0,40      | 0,20      | 0,50      | 0,20      | 0,20      |       |
| Mental health                | 0,50      | 0,00      | 0,33      | 0,00      | 0,20      | 0,00      | 0,10      | 0,00      |       |
| Migrant and refugees health  | 1,00      | 0,65      | 1,40      | 0,30      | 0,00      | 0,00      | 0,20      | 0,20      |       |
| Poliomyelitis                | 0,17      | 0,05      | 0,07      | 0,10      | 0,20      | 0,50      | 0,30      | 0,20      |       |
| Tobacco                      | 0,00      | 0,10      | 0,40      | 0,80      | 0,80      | 0,25      | 0,00      | 0,00      |       |
| Tuberculosis                 | 1,00      | 0,00      | 0,13      | 0,40      | 0,20      | 0,50      | 0,20      | 0,40      |       |
| Vaccines                     | 0,00      | 0,10      | 0,67      | 0,50      | 0,40      | 0,50      | 1,00      | 0,20      |       |
| Water sanitation and hygiene | 1,50      | 0,70      | 0,67      | 0,30      | 0,00      | 0,00      | 0,10      | 0,20      |       |

Wernli, Falcone et al. BMJ Global Health, version 21.03.2023

Supplementary material 21 – Stacked column of importance of selected health issues with a score above 1 (in the supplementary material 20)

The figure was computed by using the result of the supplementary material 20.

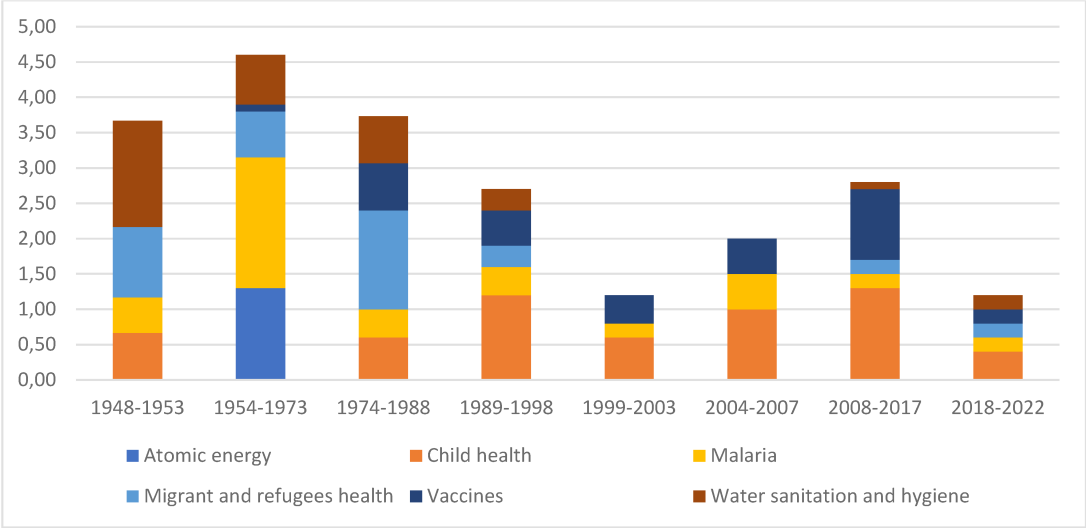

Supplementary material 22 – Potentially relevant variables related to the WHA resolutions dataset

| Type of variable                                                                                      | Aspects to be addressed                                                                                                                                     |
|-------------------------------------------------------------------------------------------------------|-------------------------------------------------------------------------------------------------------------------------------------------------------------|
| Agenda document/report by Secretariat                                                                 | To what extent agenda document gives rise to a decision and resolutions? How is the technical literature used in agenda document/report by the Secretariat? |
| Executive Board resolutions and agenda document                                                       | How the Executive Board shapes the agenda of the World Health Assembly (or vice-versa)                                                                      |
| Annex to the resolutions                                                                              | Expand our understanding of the content that was adopted and provide a new tool for the interpretation of adopted documents                                 |
| Constitution of the World Health Organization                                                         | Understand the role played by the constitution and what are the section of the constitution that are the most referred to.                                  |
| Resolutions from the regional office of WHO                                                           | Understand the issue of regionalization (decentralization) which has received attention in the literature                                                   |
| Resolution and guidance from other international organization such as United Nations General Assembly | Understand how a specialized agency of the United Nations works within the broader United Nations system.                                                   |
| States use of multiple multilateral fora                                                              | How States navigate the United Nations family specialised organizations to promote an agenda or resist normative developments                               |
